# Supplementary material for: Modeling impact and cost-effectiveness of gene drives for malaria elimination in the Democratic Republic of the Congo
Source: bioRxiv or medRxiv preprint supplement (doi:10.1101/2020.06.29.20142760), 2021-02-22
Supplement: Supplementary file [file 2020.06.29.20142760-1.pdf]

**Supplementary: Role of gene drives in malaria elimination strategy: modeling impact and cost-effectiveness in the Democratic Republic of the Congo.**

Supplementary 1, Non-spatial simulation framework: number and frequency of driving-Y gene-drive mosquitoes released

Bas Uele

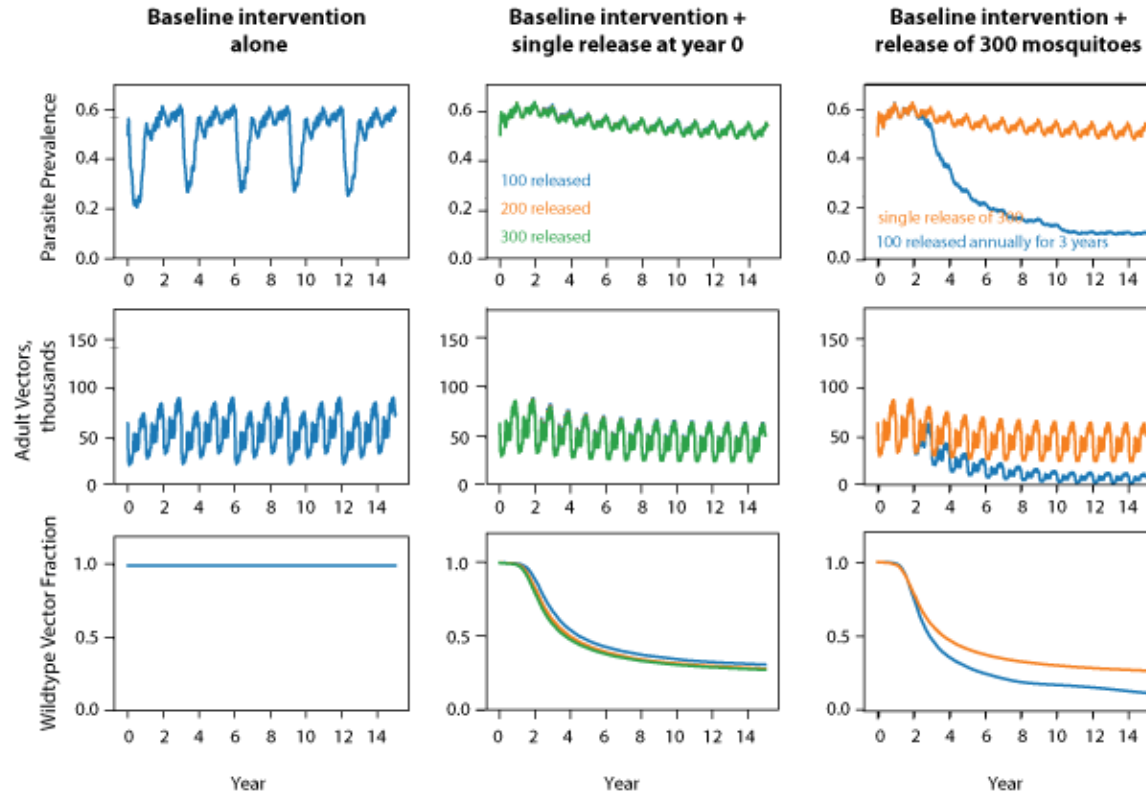

## Equateur

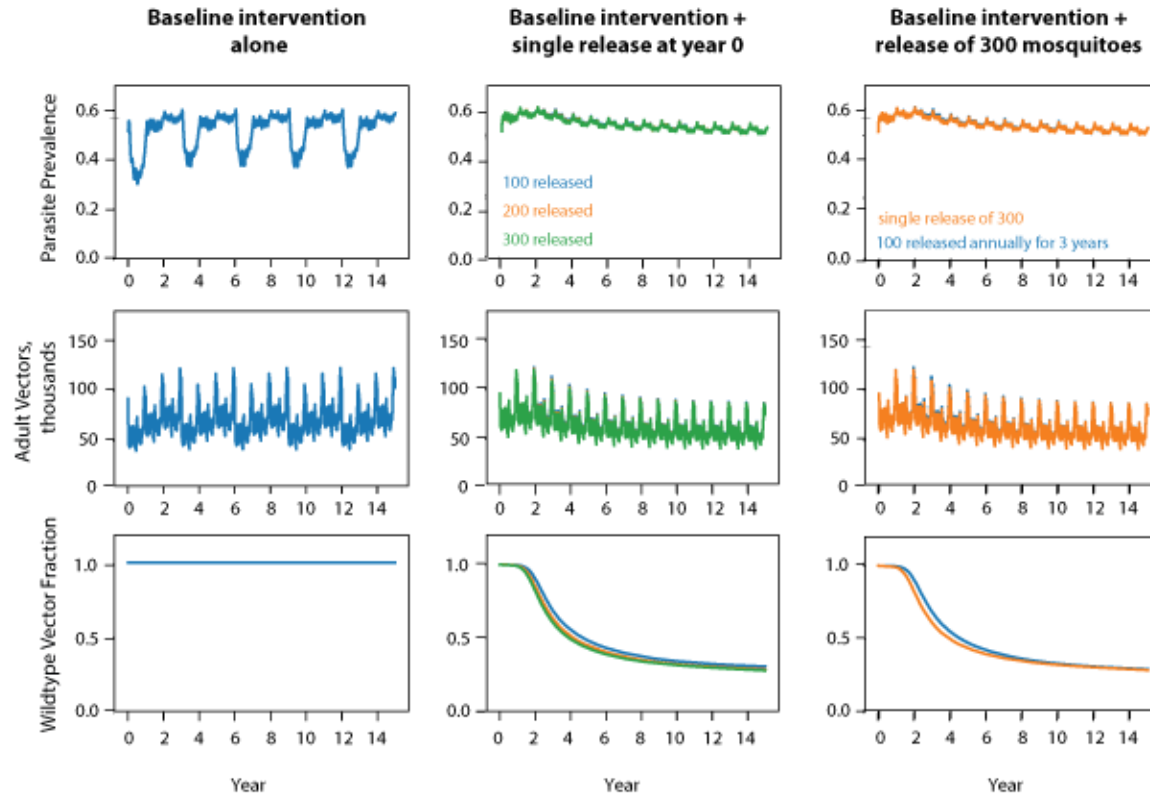

Haut Katanga

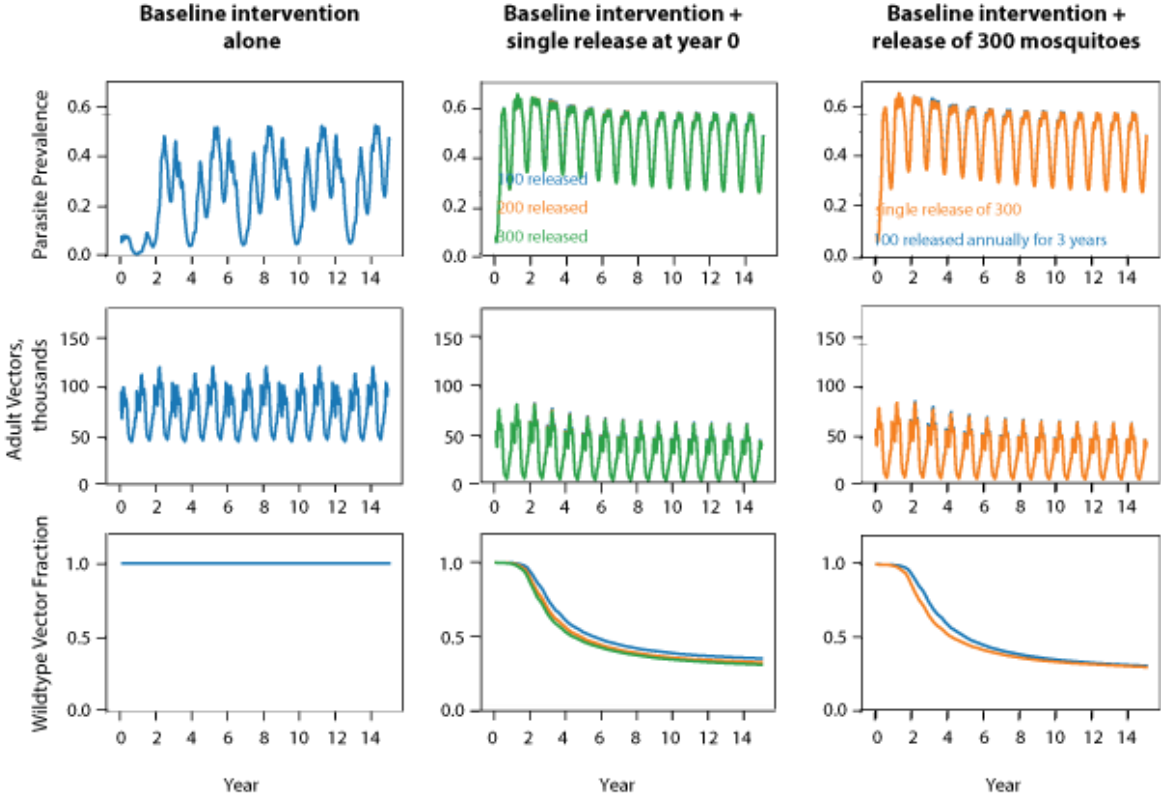

### Kasai Central

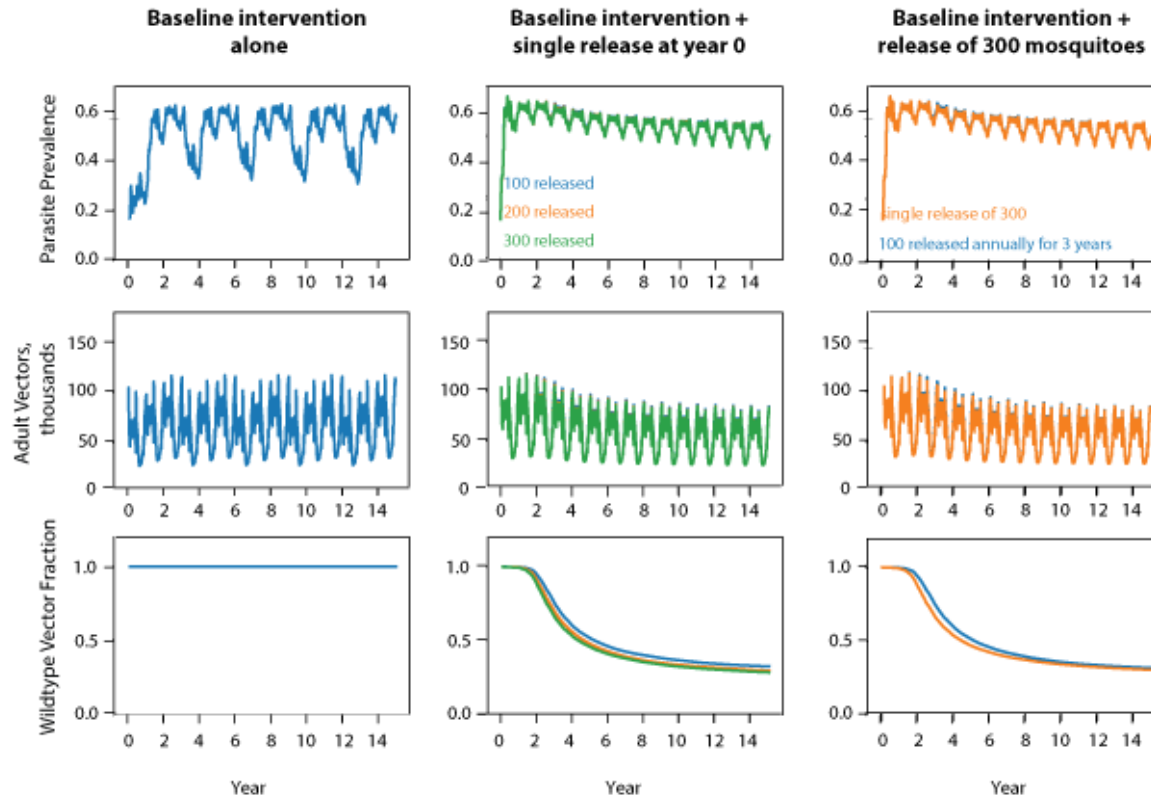

### Kinshasa

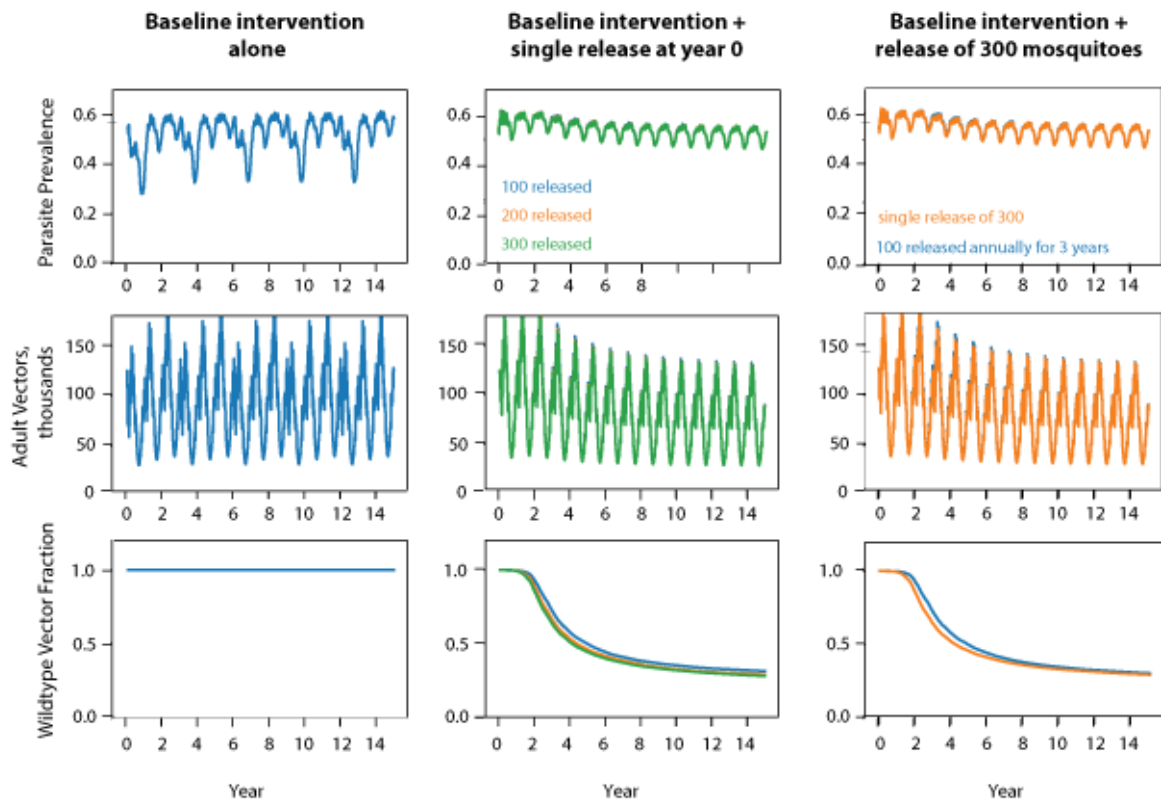

### Kwango

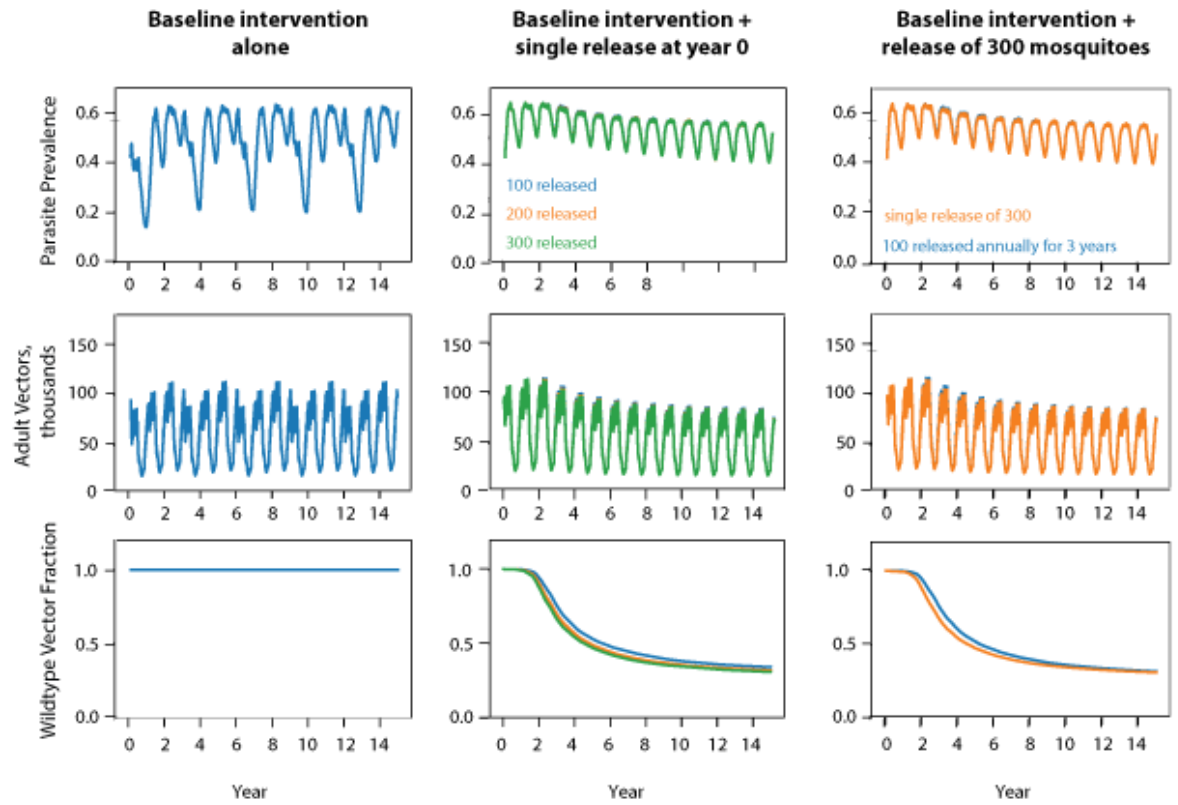

### Nord Ubangui

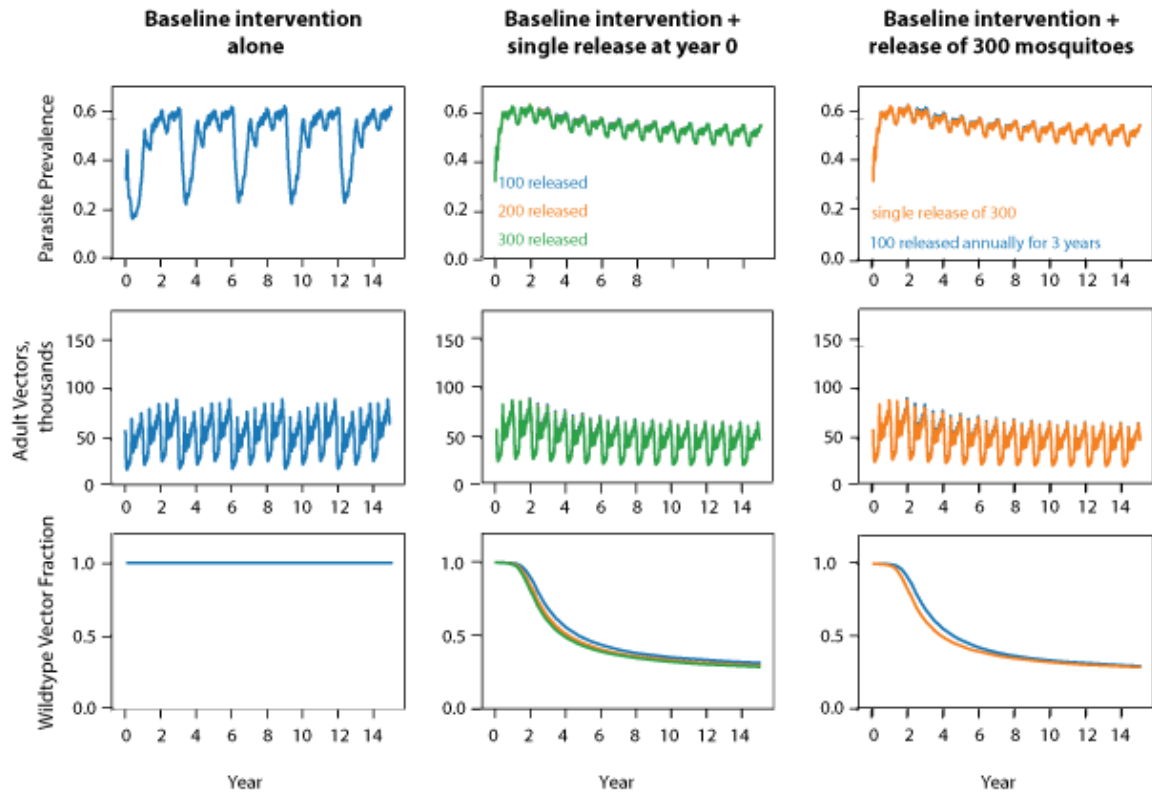

Supplementary 2, Non-spatial simulation framework: driving-Y parameters of gene-drive mosquitoes released

Basuele

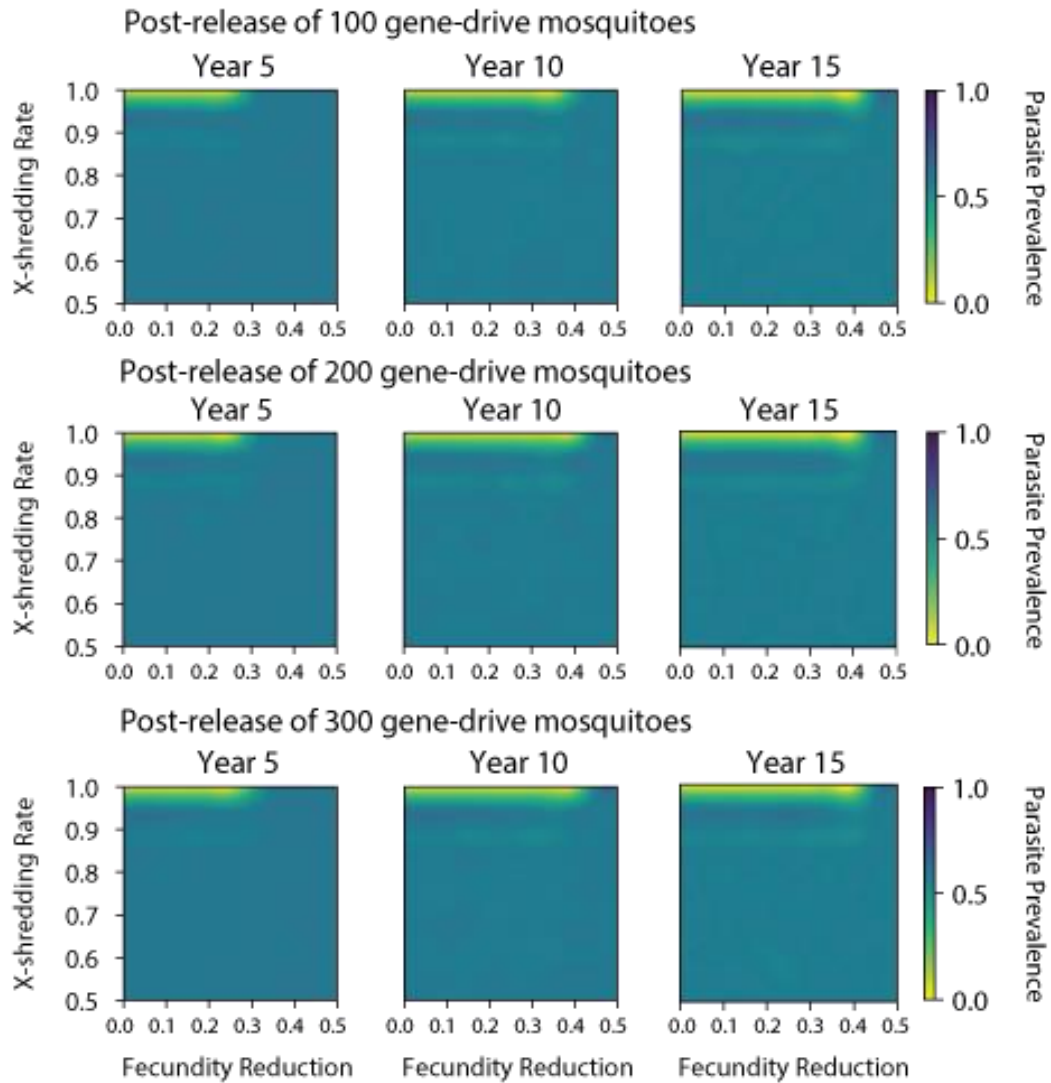



## Equateur

### Post-release of 100 gene-drive mosquitoes

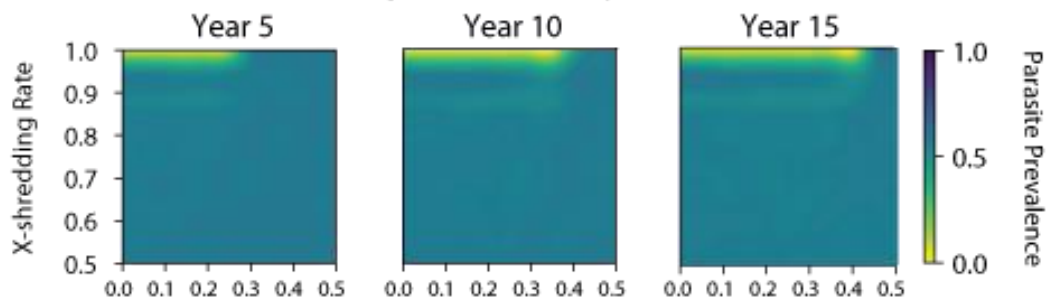

### Post-release of 200 gene-drive mosquitoes

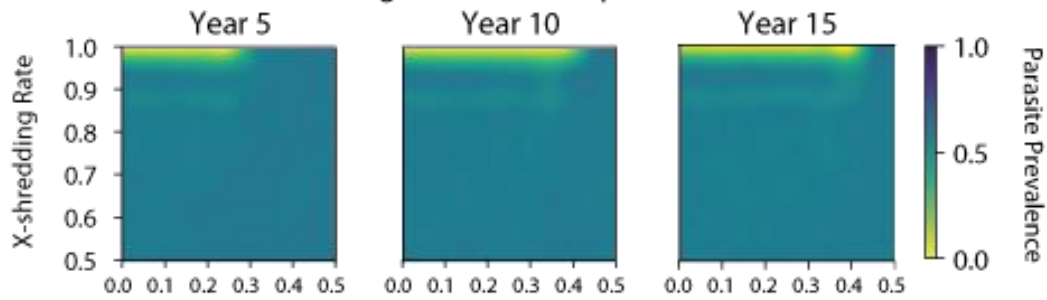

### Post-release of 300 gene-drive mosquitoes

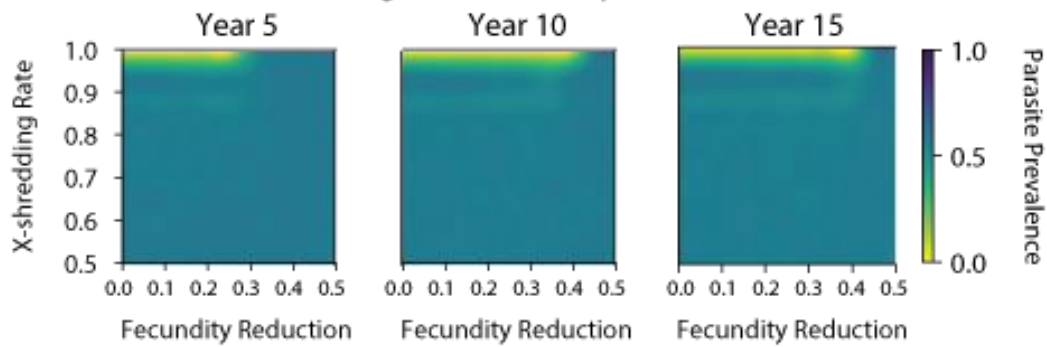

### Haut Katanga

#### Post-release of 100 gene-drive mosquitoes

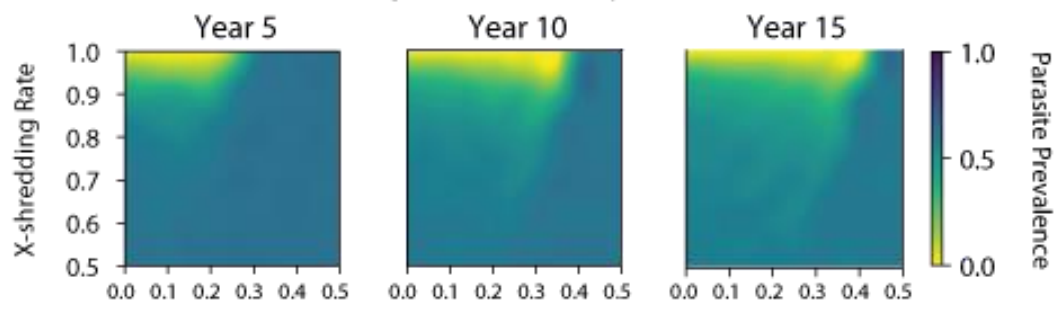

#### Post-release of 200 gene-drive mosquitoes

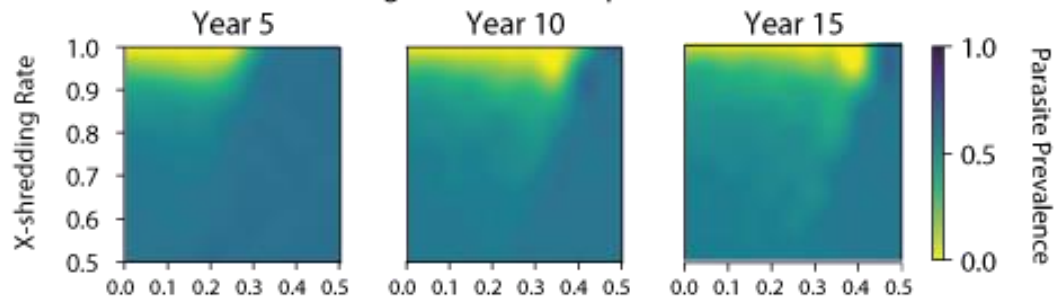

#### Post-release of 300 gene-drive mosquitoes

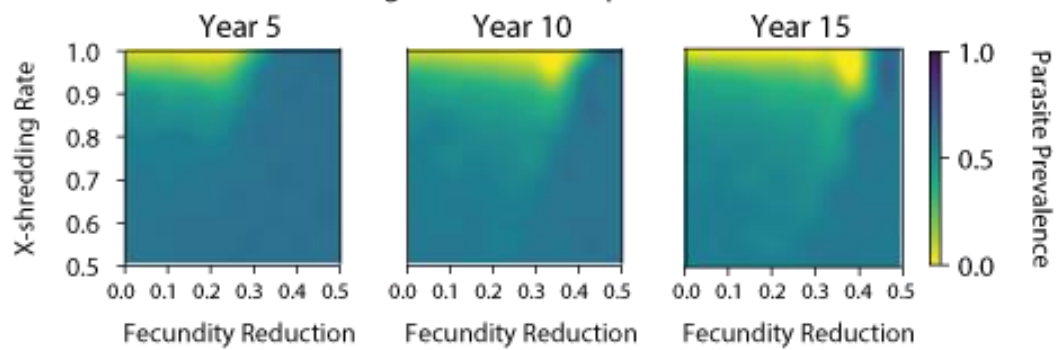

Kasai Central

Post-release of 100 gene-drive mosquitoes

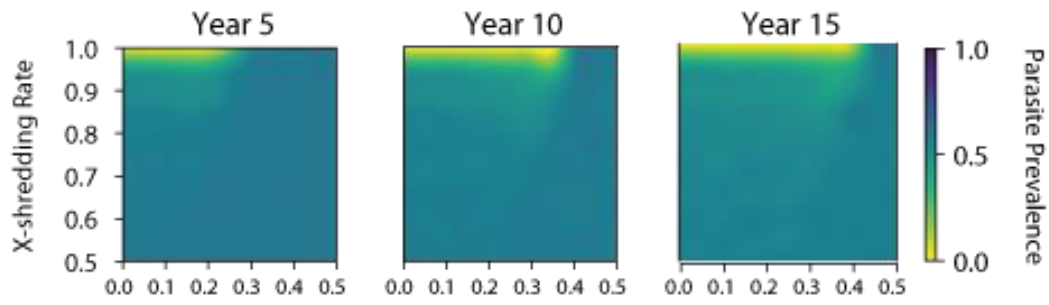

Post-release of 200 gene-drive mosquitoes

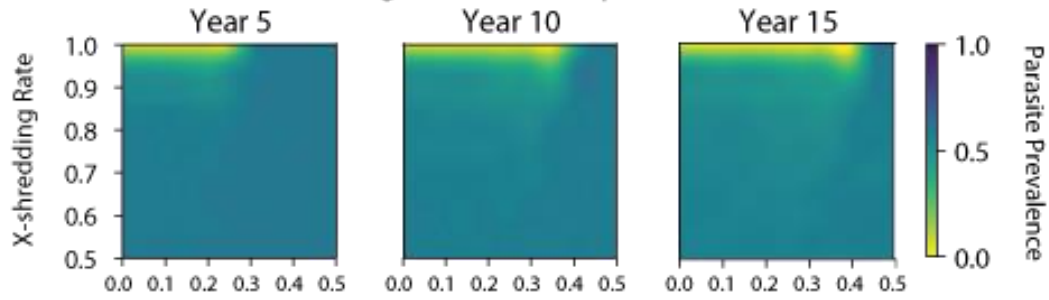

Post-release of 300 gene-drive mosquitoes

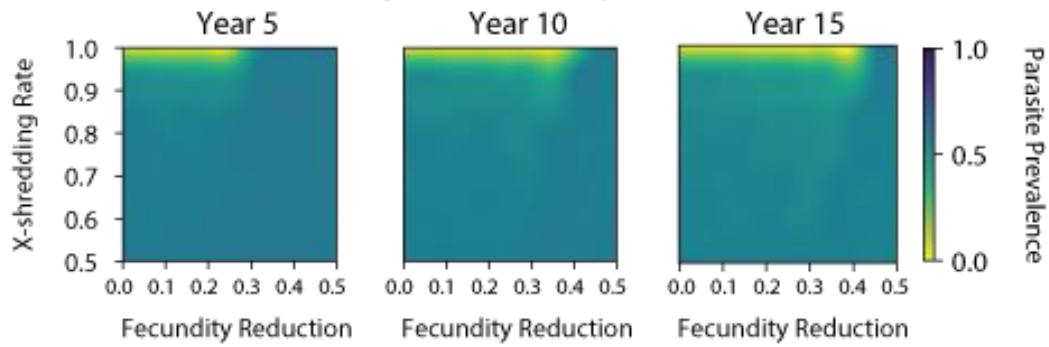

Kinshasa

Post-release of 100 gene-drive mosquitoes

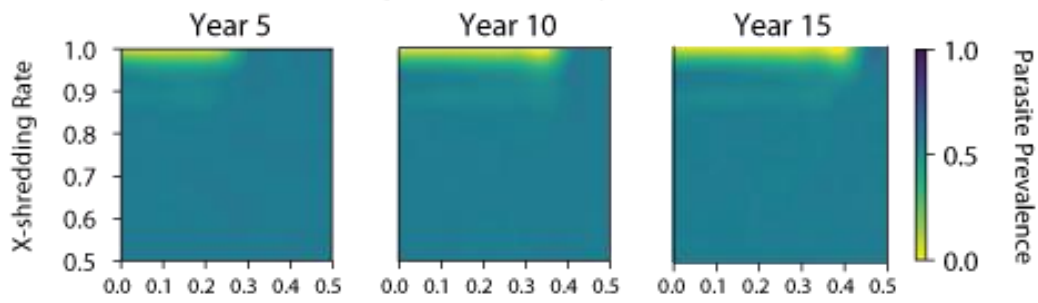

Post-release of 200 gene-drive mosquitoes

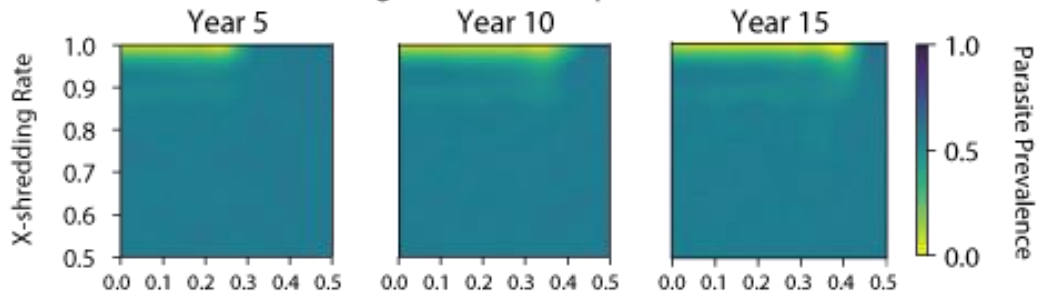

Post-release of 300 gene-drive mosquitoes

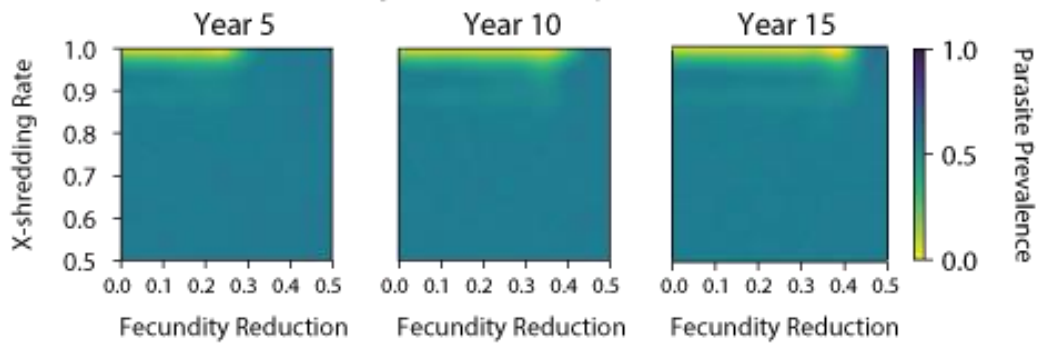

Kwango

Post-release of 100 gene-drive mosquitoes

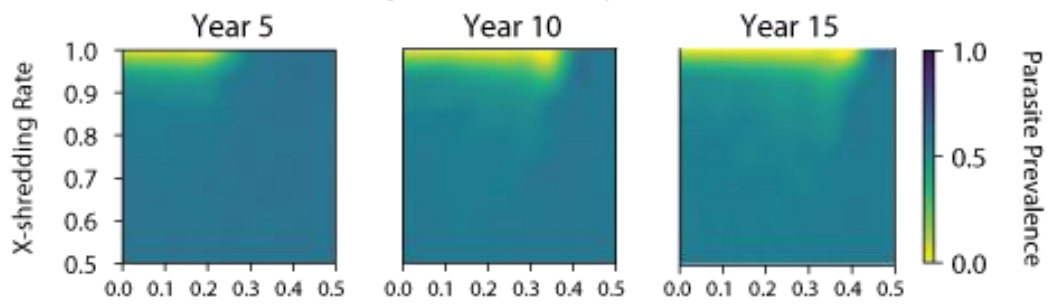

Post-release of 200 gene-drive mosquitoes

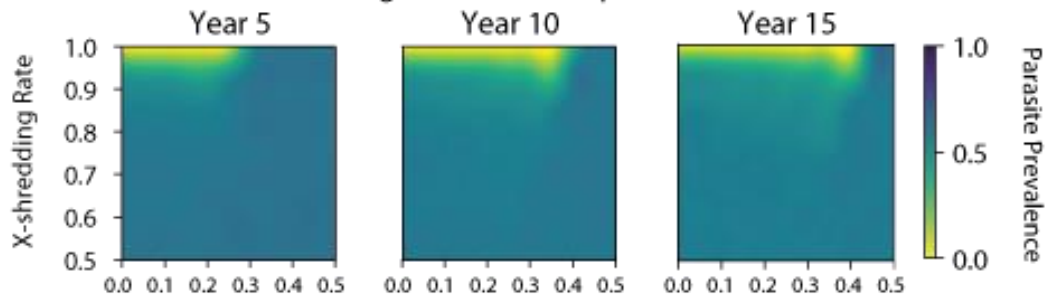

Post-release of 300 gene-drive mosquitoes

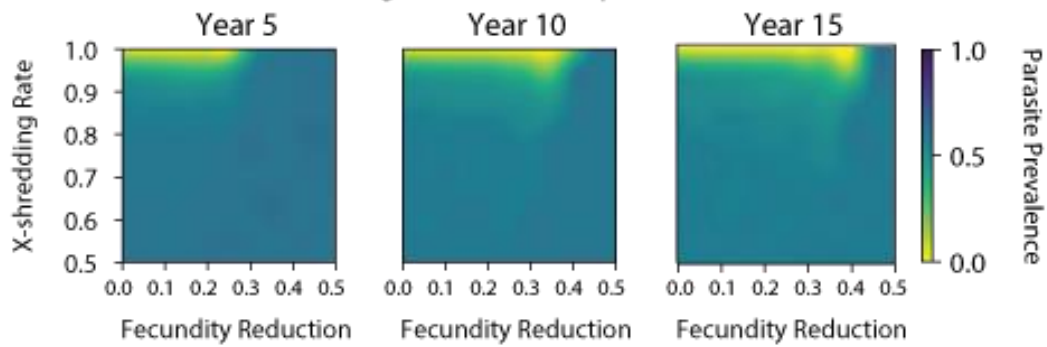

Nord Ubangui

Post-release of 100 gene-drive mosquitoes

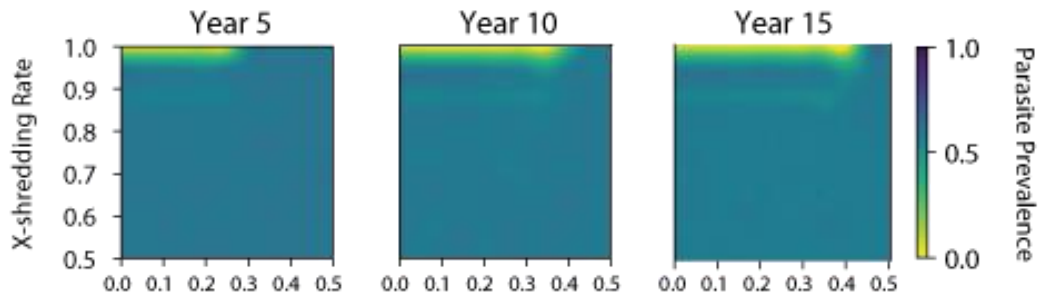

Post-release of 200 gene-drive mosquitoes

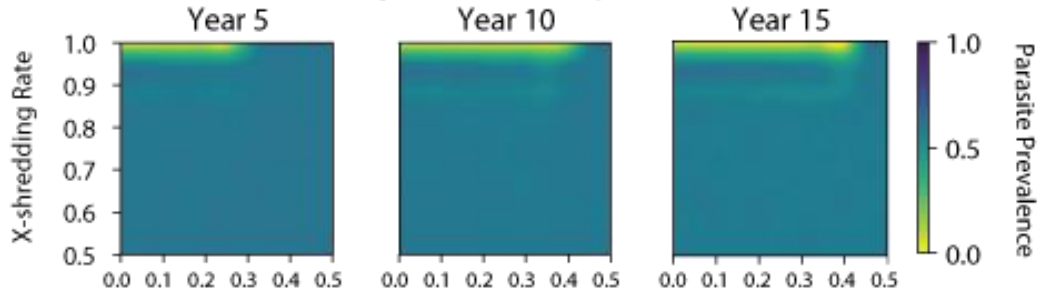

Post-release of 300 gene-drive mosquitoes

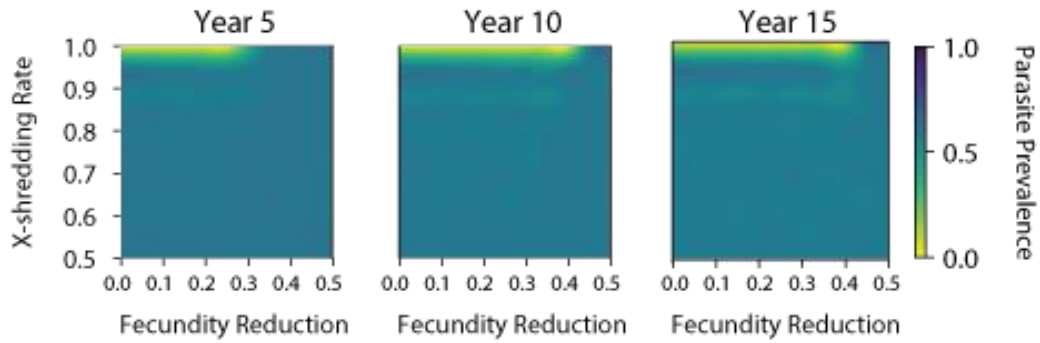

Supplementary 3: Spatial simulation framework: simulation outputs

Bas Uele - scenarios without gene drives

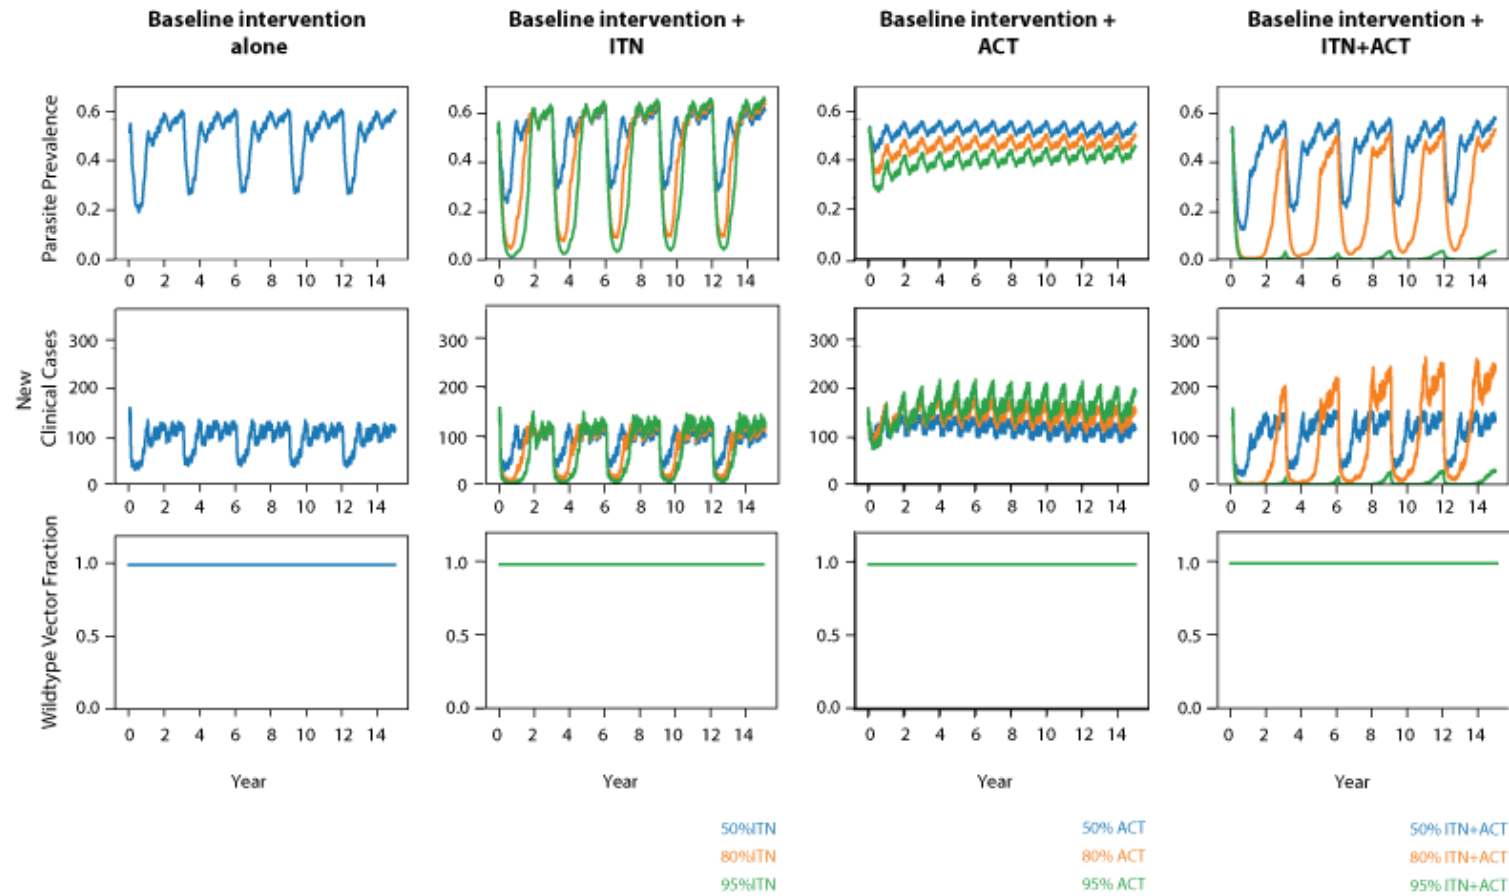

Bas Uele - scenarios with 300 gene drives released at year 0

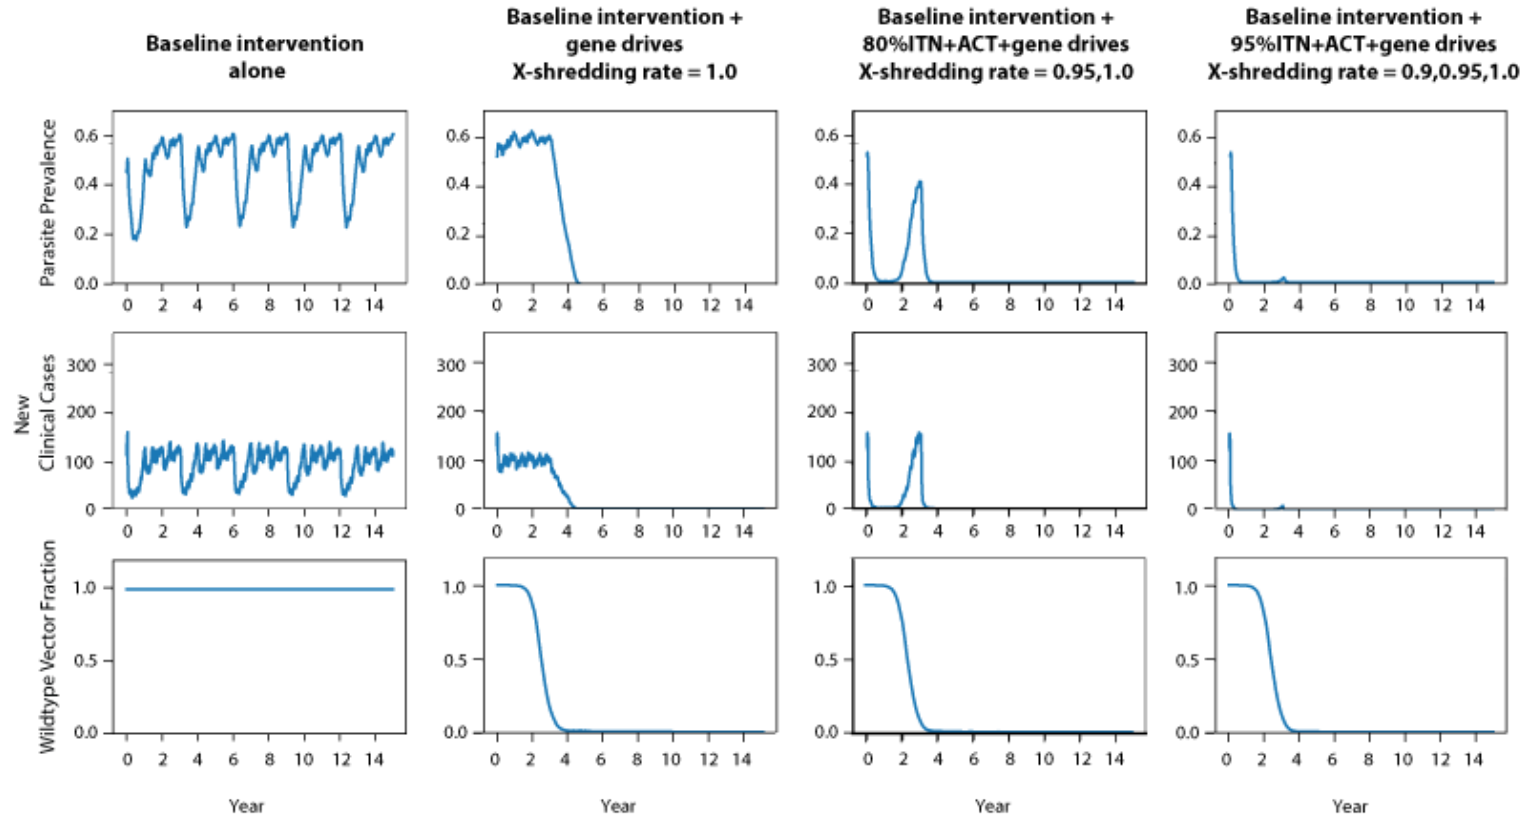



**Equateur - scenarios without gene drives**

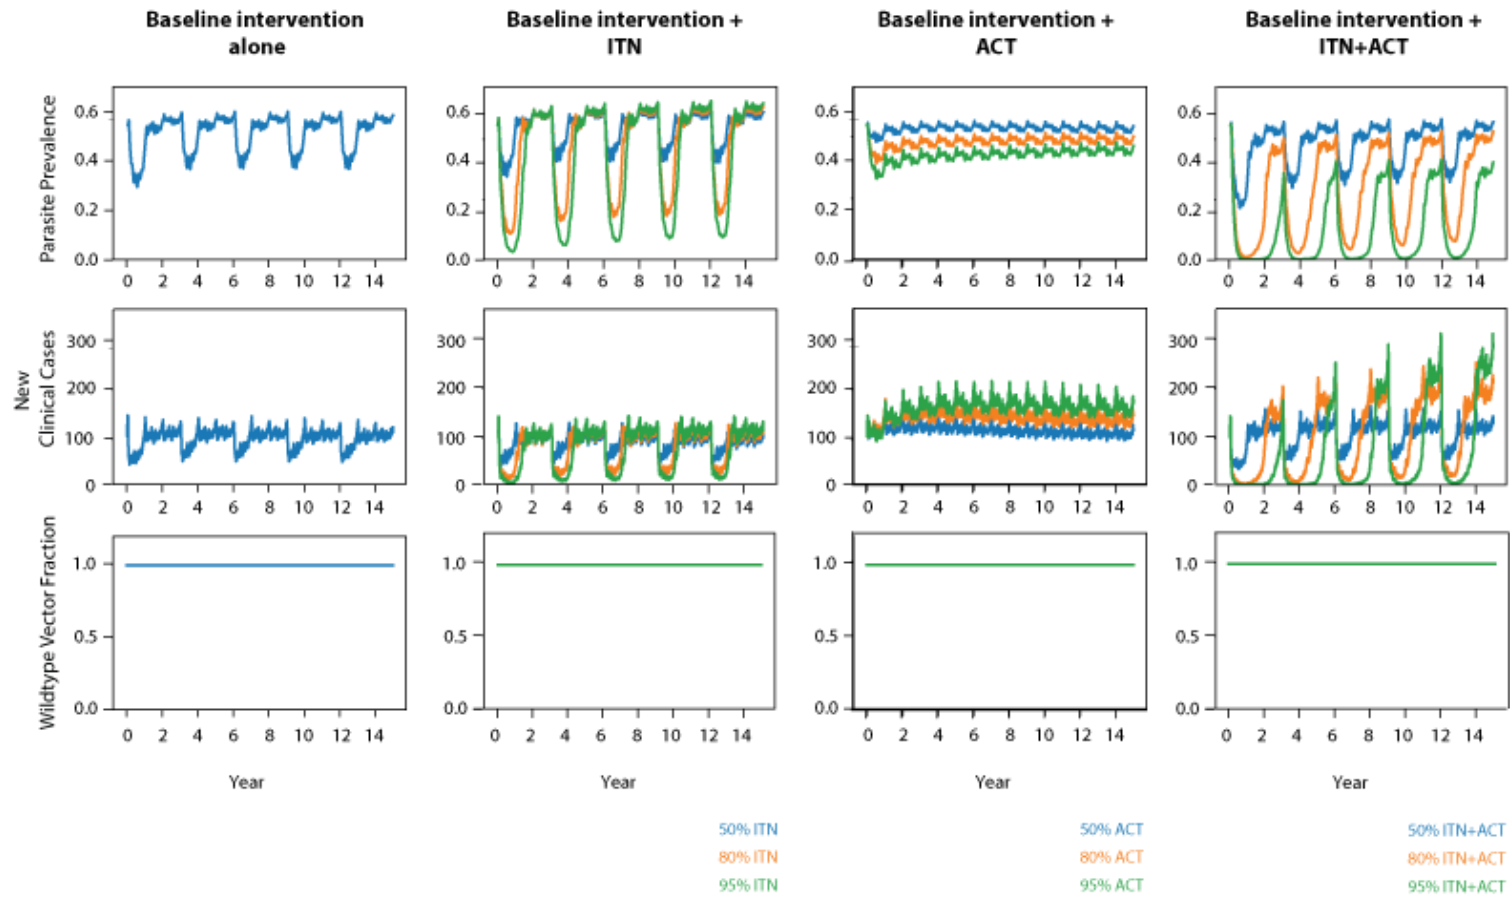

Equateur - scenarios with 300 gene drives at year 0

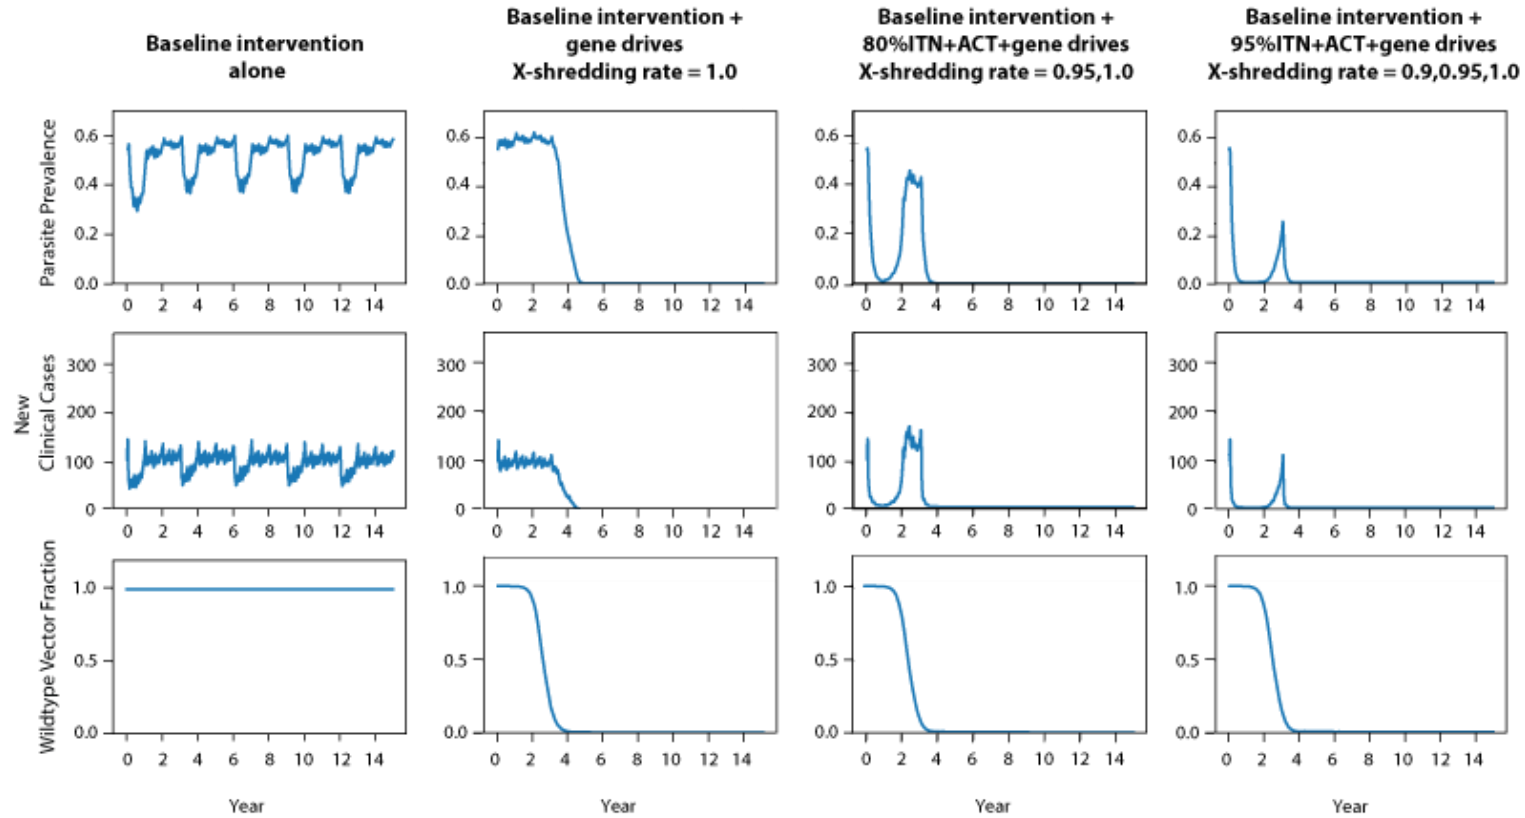

Haut Katanga - scenarios without gene drives

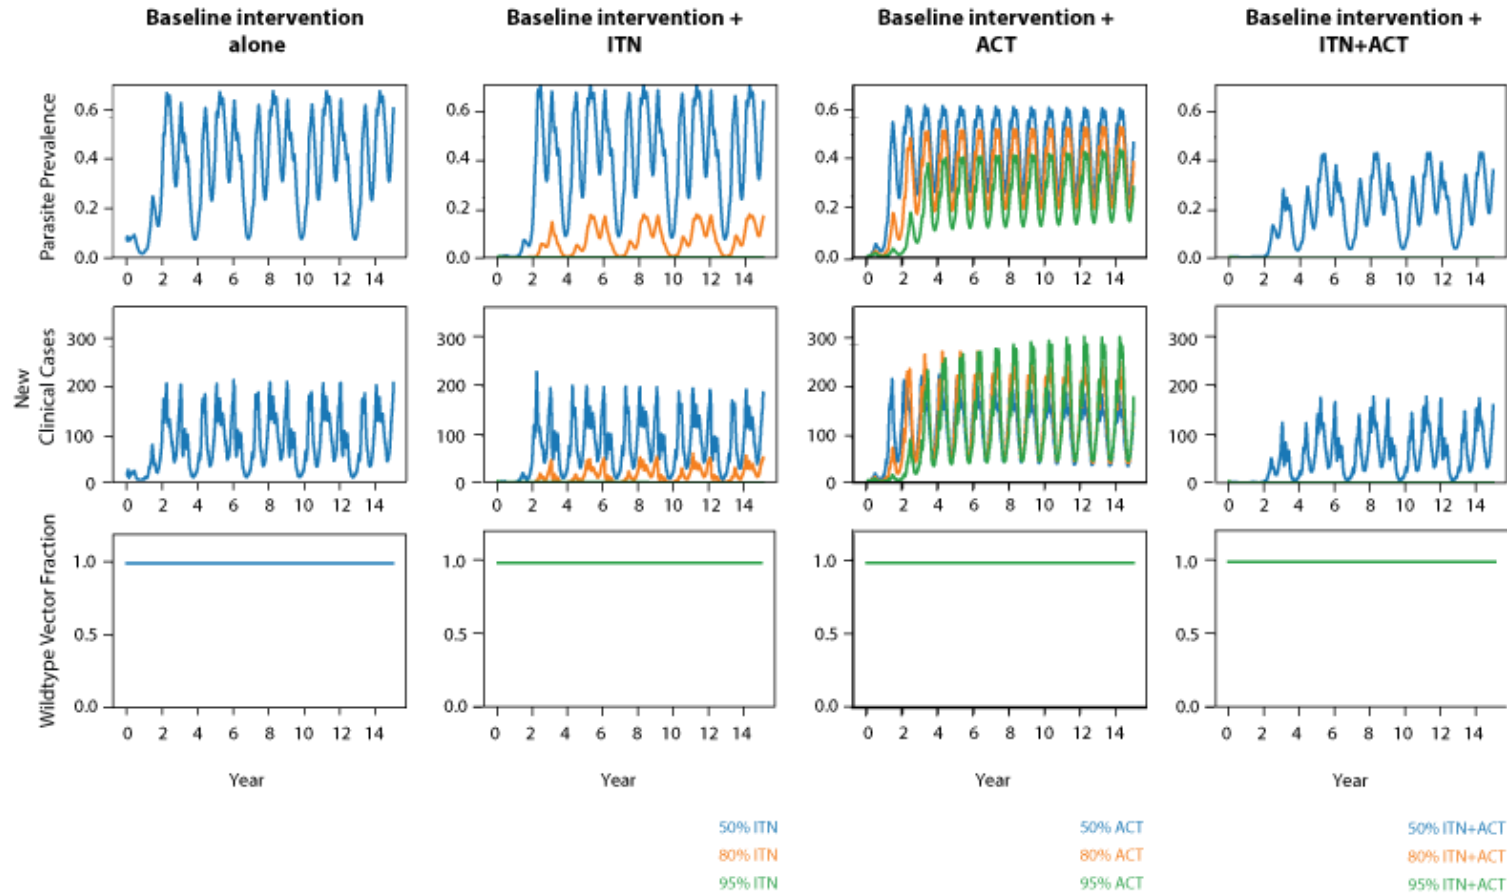

Haut Katanga - scenarios with 300 gene drives released at year 0

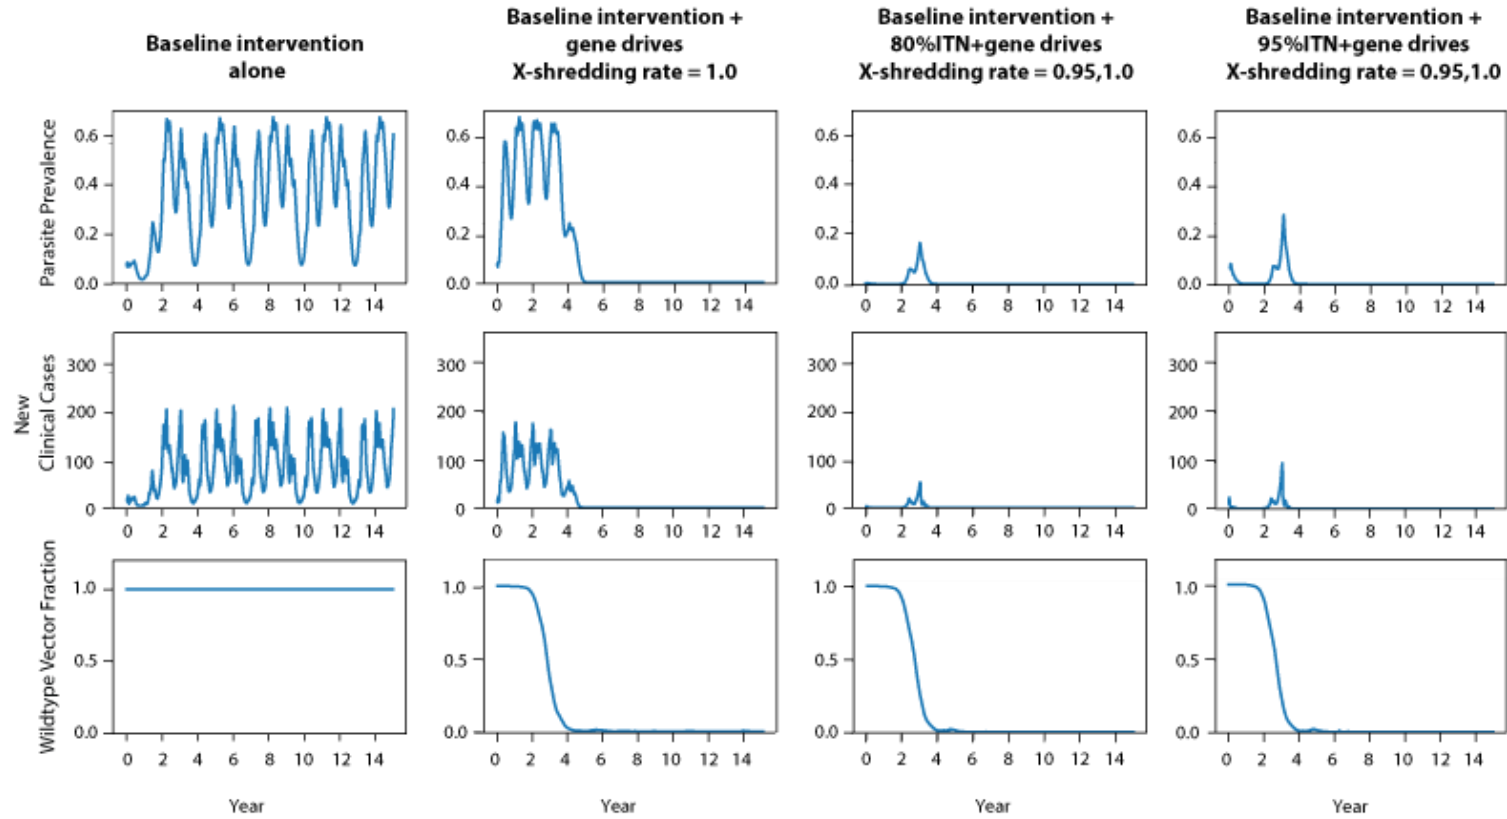

Haut Katanga - scenarios with 300 gene drives released at year 0

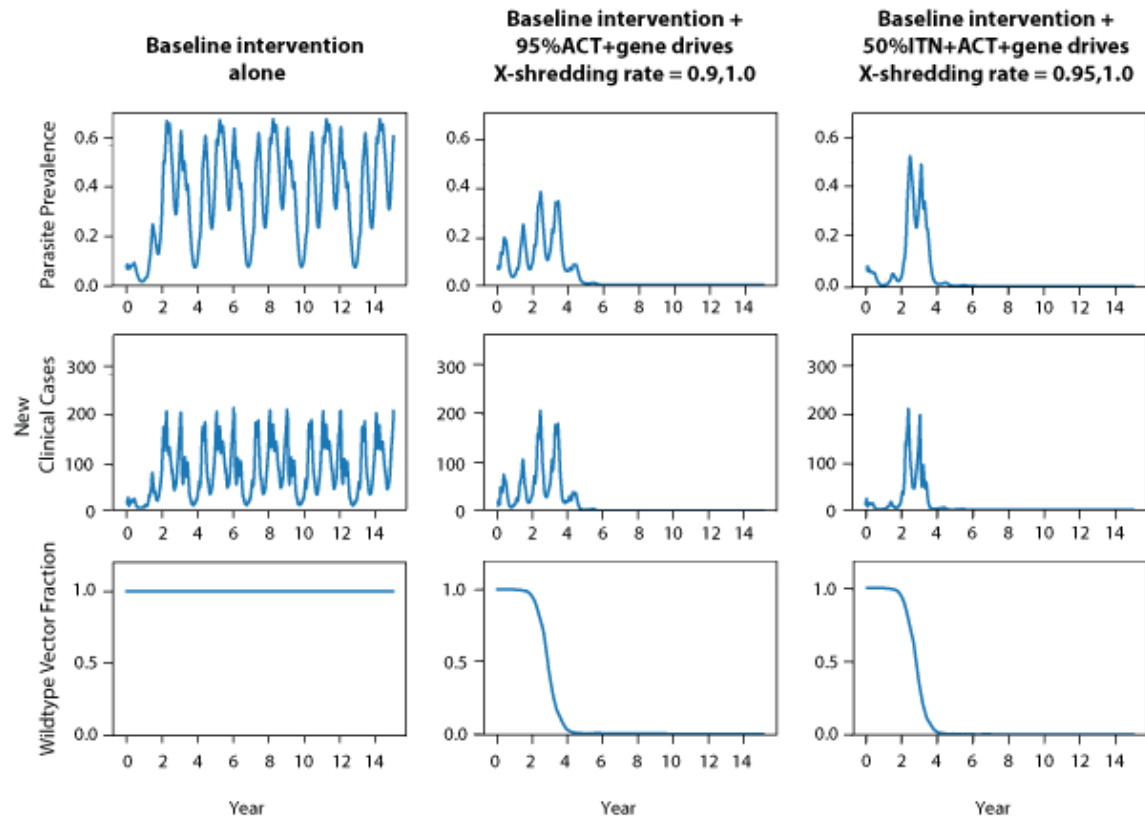

Kasai Central - scenarios without gene drives

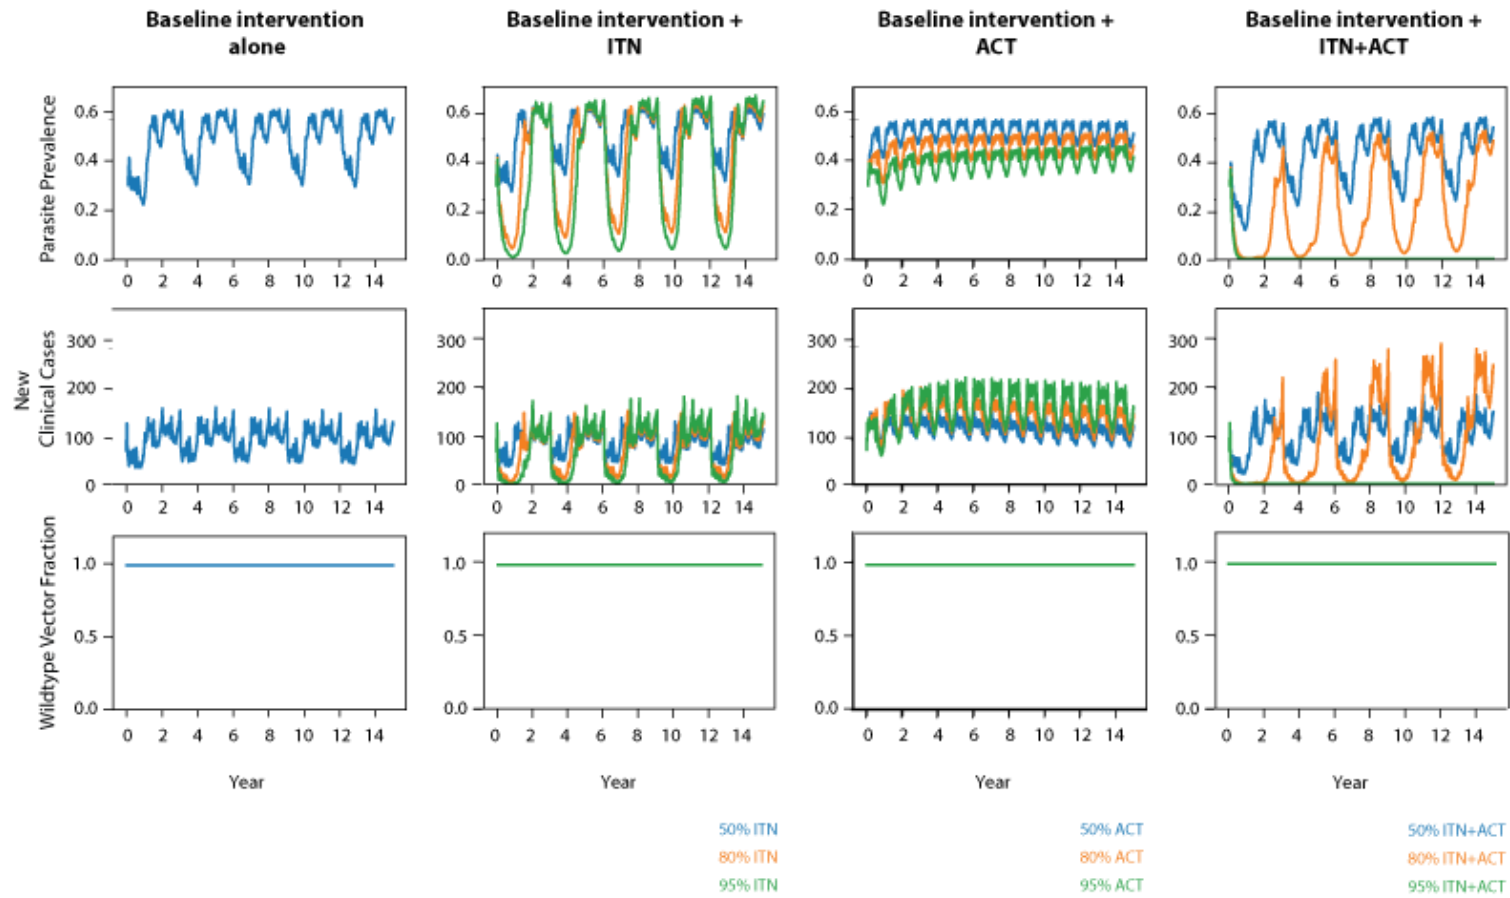

Kasai Central - scenarios with 300 gene drives released at year 0

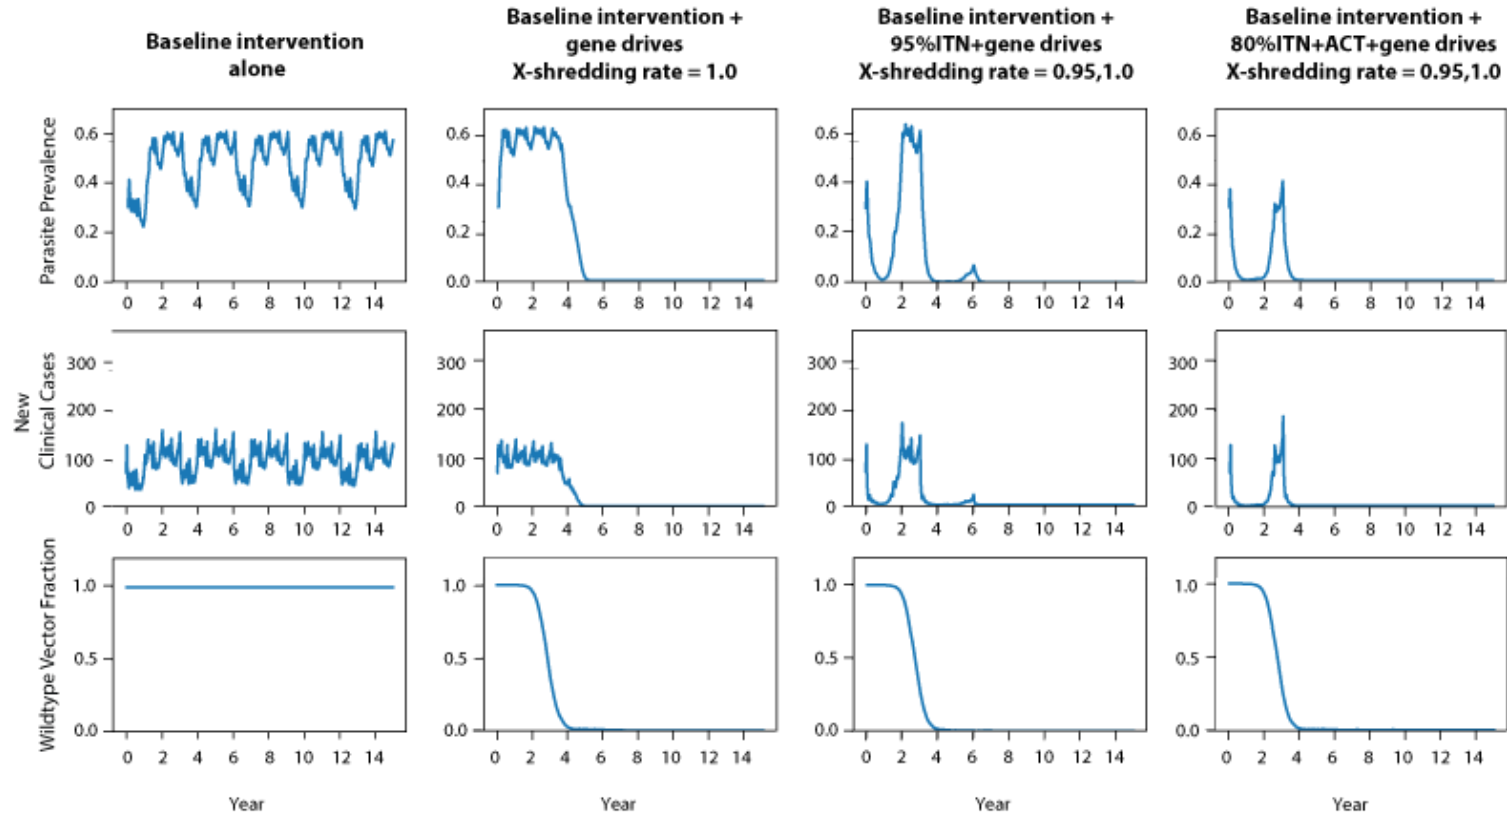

Kinshasa - scenarios without gene drives

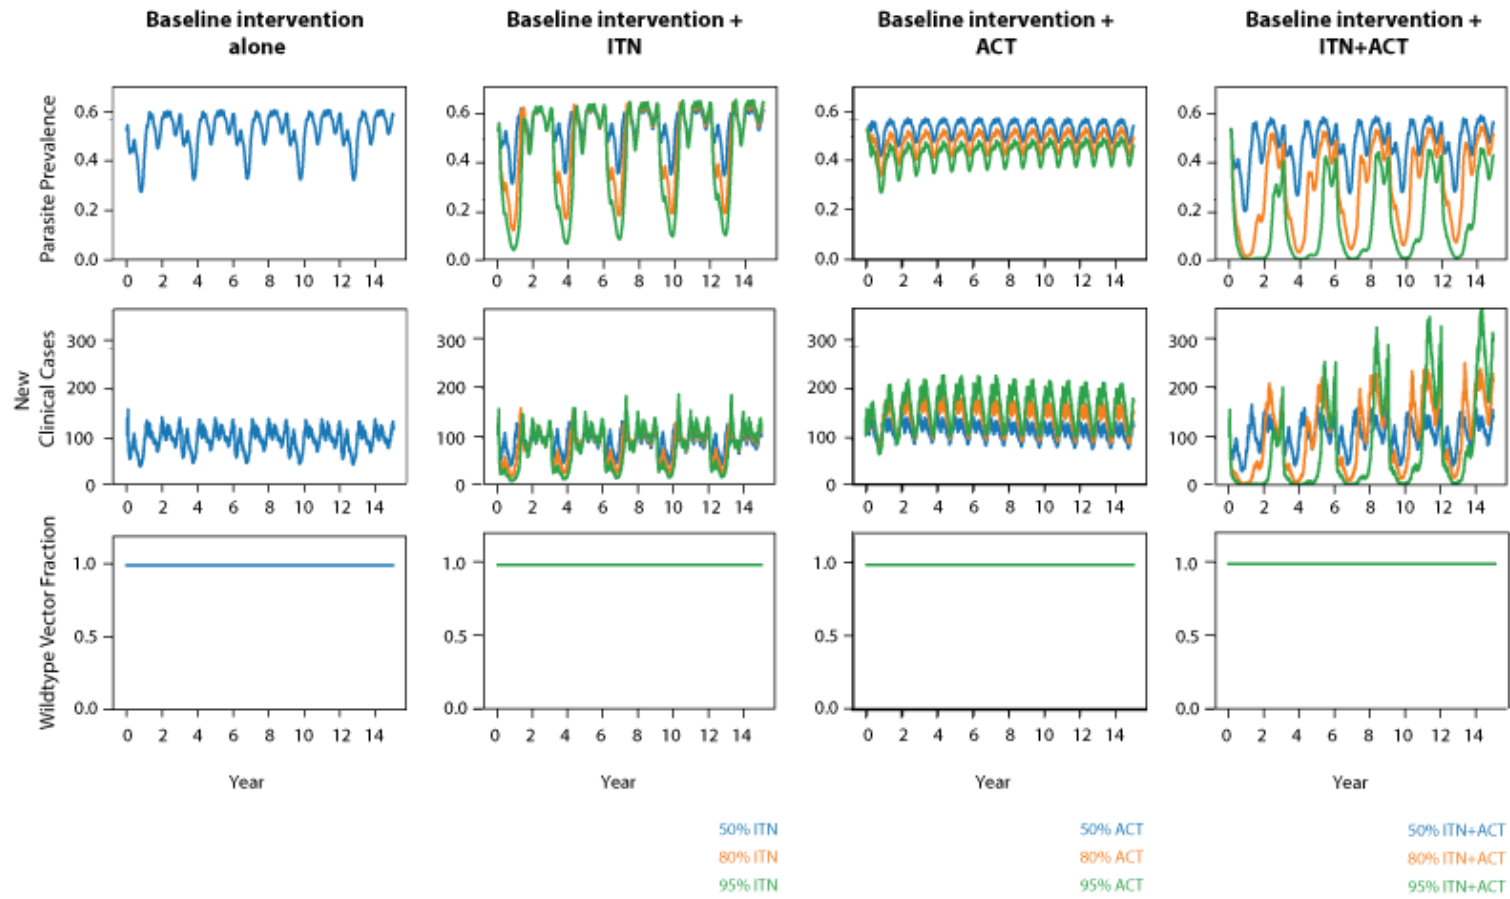



Kinshasa - scenarios with 300 gene drives released at year 0

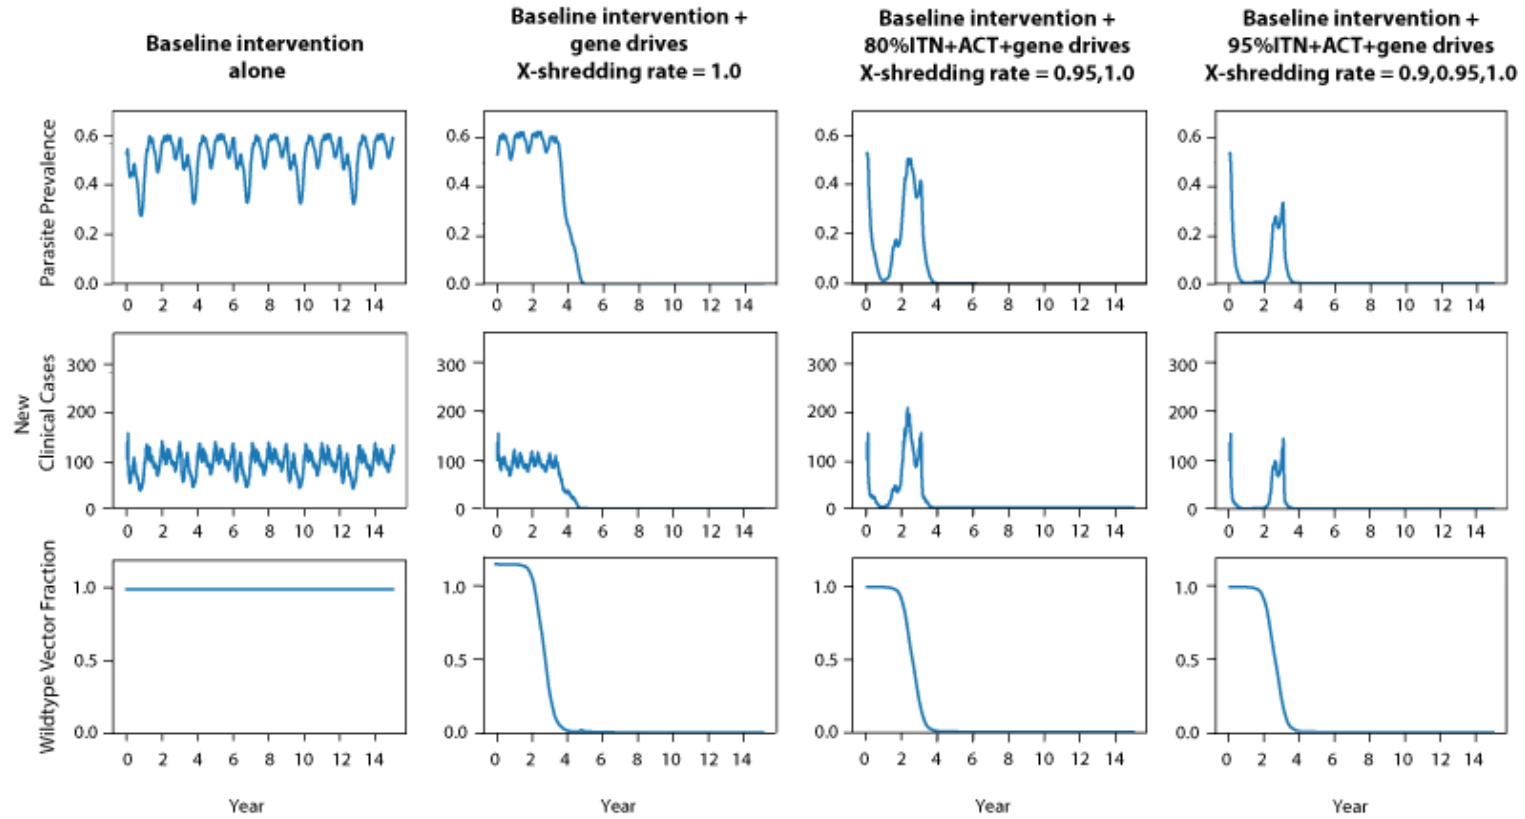

**Kwango - scenarios without gene drives**

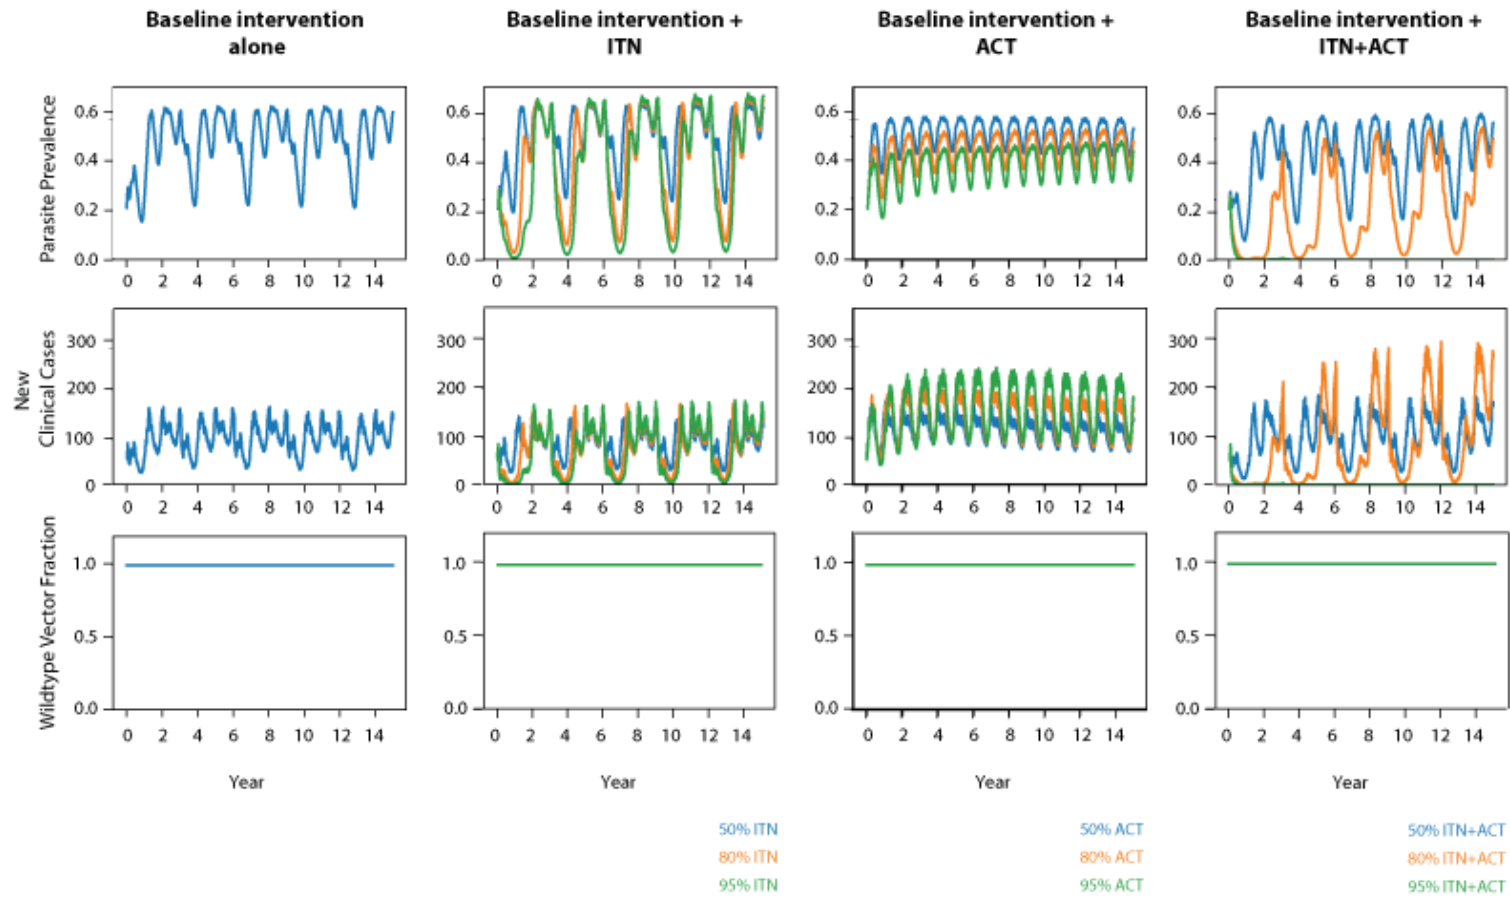

**Kwango - scenarios with 300 gene drives released at year 0**

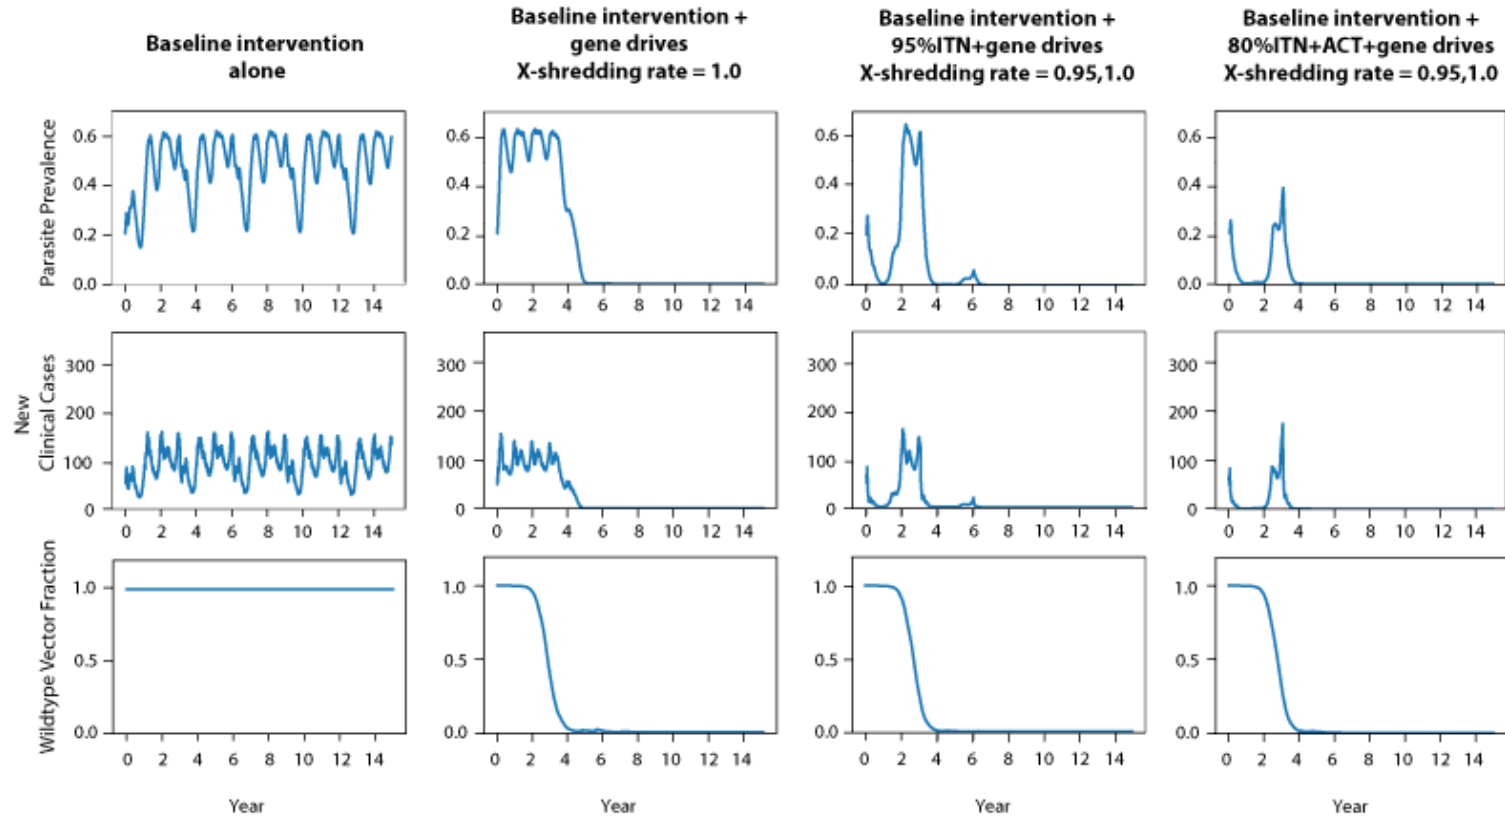

Nord Ubangui - scenarios without gene drives

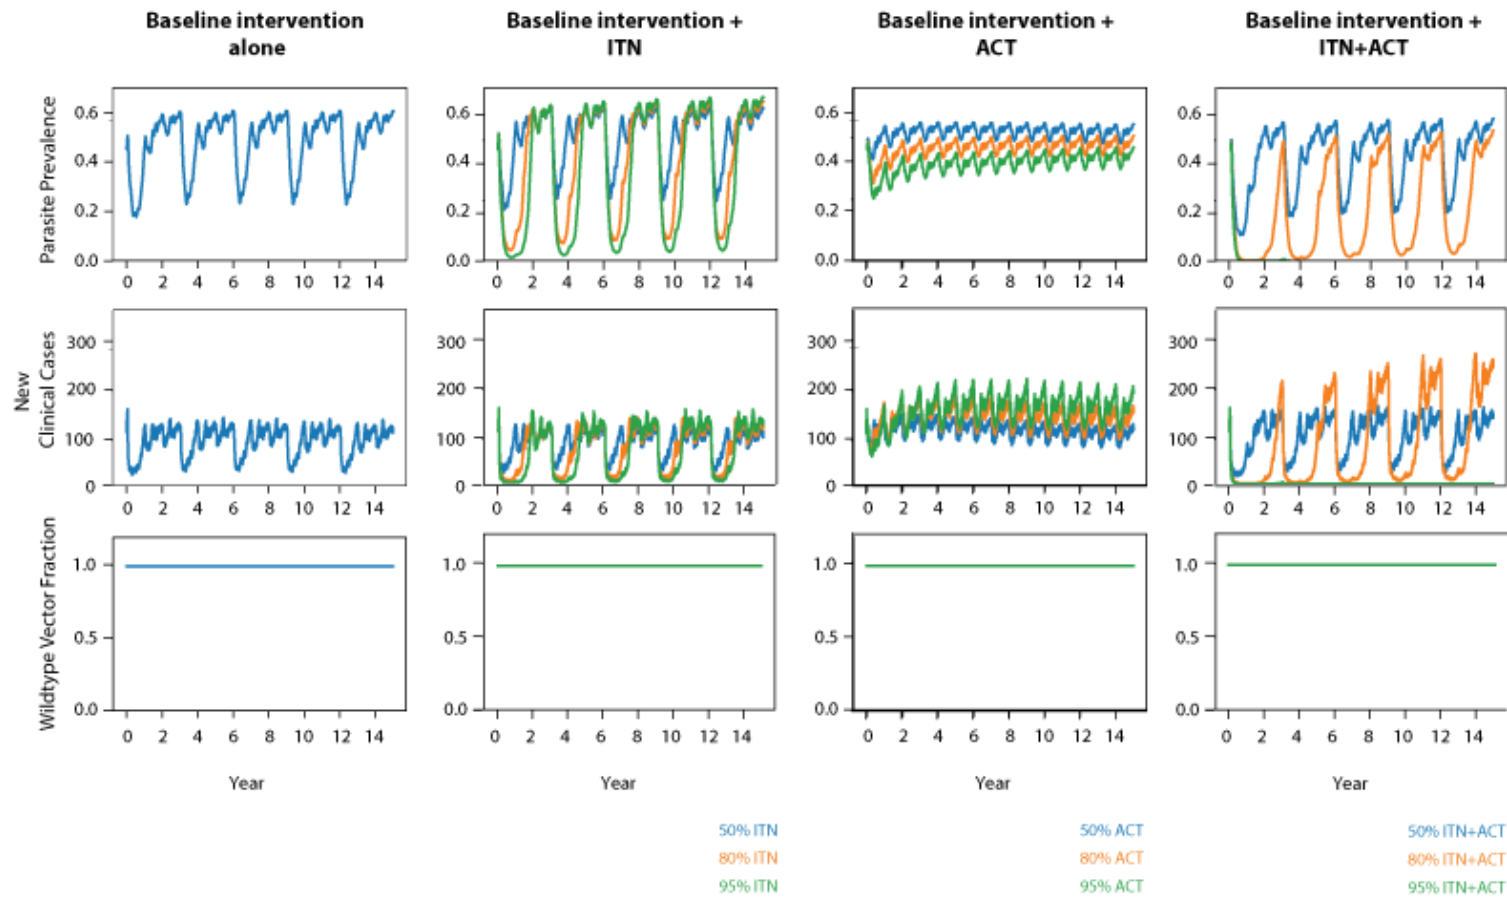

Nord Ubangui - scenarios with 300 gene drives released at year 0

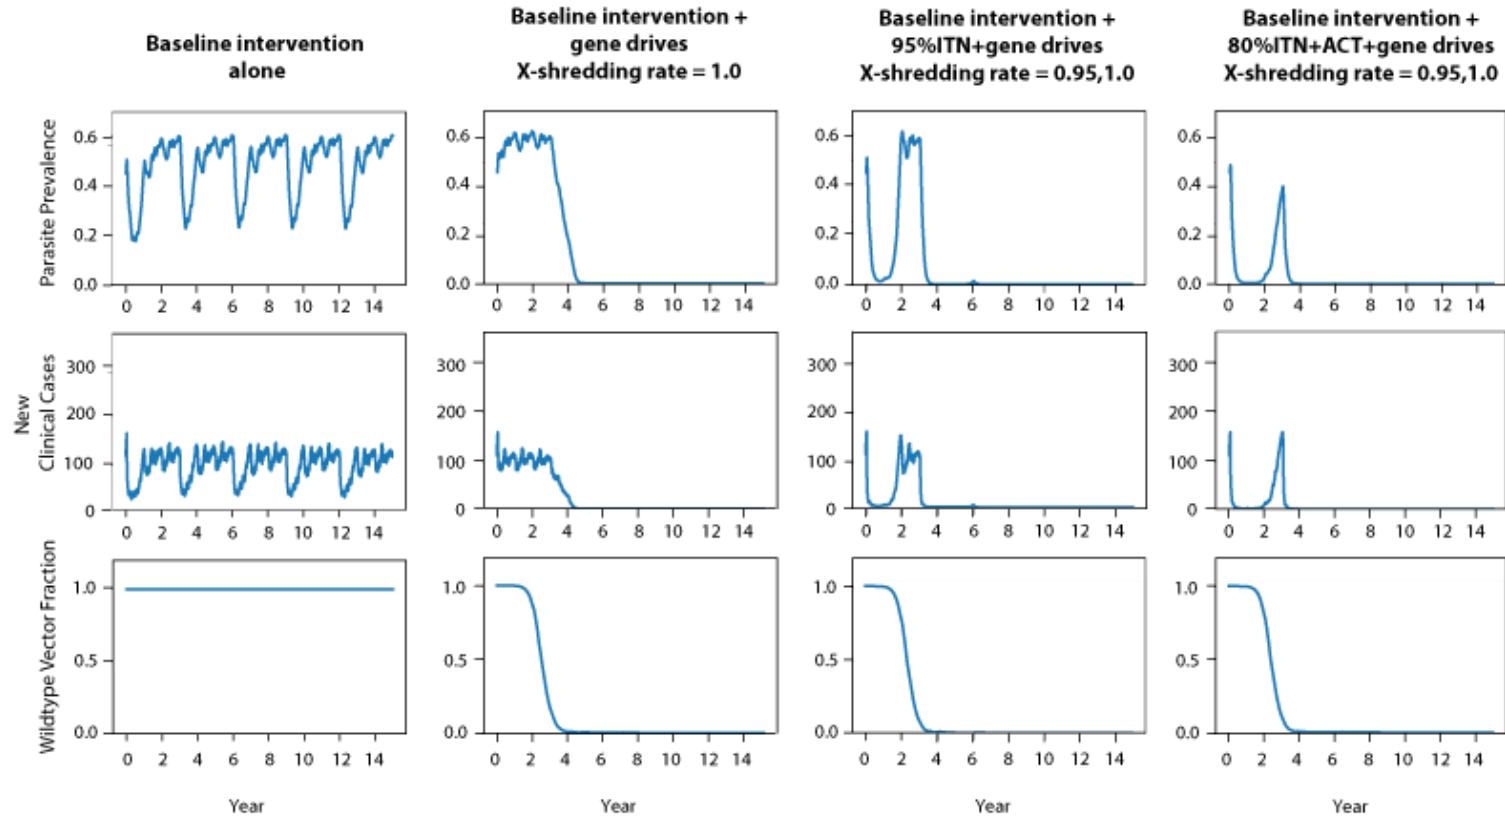

Supplementary 4: Economic analysis

**Table S1** Average DALYs averted per year per one million population across all locations estimated from model's outputs in spatial simulation framework. Estimates of each scenario were compared with baseline scenario, which 50% ITNs and 19% ACT coverage were applied. For scenarios that included gene drives, only the estimates from scenarios that resulted in malaria elimination were included.

|                               |                                                                        | Average DALYs averted per year per one million population |          |                       |                              |                                |
|-------------------------------|------------------------------------------------------------------------|-----------------------------------------------------------|----------|-----------------------|------------------------------|--------------------------------|
|                               |                                                                        | Model's estimates                                         |          |                       |                              |                                |
|                               |                                                                        | Intervention                                              | Coverage | Average over 15 years | The first interval: year 1-5 | The second interval: year 6-10 |
| Scenarios without gene drives | ITNs                                                                   | 50%                                                       | -3,696   | -6,818                | -2,361                       | -1,910                         |
|                               |                                                                        | 80%                                                       | 1,482    | 12,827                | -1,990                       | -6,390                         |
|                               |                                                                        | 95%                                                       | 8,727    | 27,165                | 2,158                        | -3,143                         |
|                               | ACT                                                                    | 50%                                                       | 1,680    | -7,733                | 2,506                        | 10,266                         |
|                               |                                                                        | 80%                                                       | 12,962   | 10,390                | 10,212                       | 18,283                         |
|                               |                                                                        | 95%                                                       | 21,437   | 25,261                | 15,883                       | 23,169                         |
|                               | ITNs & ACT                                                             | 50%                                                       | 8,004    | 14,973                | 4,432                        | 4,606                          |
|                               |                                                                        | 80%                                                       | 33,477   | 60,693                | 21,288                       | 18,451                         |
|                               |                                                                        | 95%                                                       | 72,706   | 81,875                | 69,014                       | 67,230                         |
| Scenarios with gene drives    | 300 gene drive mosquitoes with X-shredding rates = 1.0 alone           | NA                                                        | 57,298   | 2,888                 | 82,542                       | 86,464                         |
|                               | ITNs plus gene drives with X-shredding rates = 0.95 and 1.0            | 80                                                        | 57,561   | 12,201                | 81,580                       | 78,904                         |
|                               | ITNs plus gene drives with X-shredding rates = 0.95 and 1.0            | 95                                                        | 68,222   | 43,505                | 75,420                       | 85,741                         |
|                               | ACT plus gene drives with X-shredding rates = 0.95 and 1.0             | 95                                                        | 68,006   | 40,162                | 83,090                       | 80,766                         |
|                               | ITNs & ACT plus gene drives with X-shredding rates = 0.95 and 1.0      | 50                                                        | 67,740   | 39,311                | 83,142                       | 80,766                         |
|                               | ITNs & ACT plus gene drives with X-shredding rates = 0.95 and 1.0      | 80                                                        | 81,029   | 73,234                | 82,414                       | 87,441                         |
|                               | ITNs & ACT plus gene drives with X-shredding rates = 0.9, 0.95 and 1.0 | 95                                                        | 85,307   | 86,609                | 81,819                       | 87,492                         |

**Notes for Table S1:**

- 1) NA: Not applicable
- 2) Green highlight: the scenario achieved malaria elimination
- 3) It is possible that the DALY averted results turned out to be negative figures in some scenarios since the combination of ITNs at 50% coverage and ACT at 19% coverage was applied in the baseline scenarios that were used as a comparator to reflect reality. For example, a 50%ITNs scenario means only ITNs at 50% coverage was applied as a single intervention in the scenario. Therefore, it is understandable that the lower efficacy of 50%ITNs alone could be observed once compared to the comparator in which the combination of 50%ITNs and 19%ACT was applied. Negative DALYs averted are in red texts.
- 4) WHO estimated the DALYs averted using null (do nothing) scenario as a comparator.

Table S2 Average cost per DALY averted of interventions and combinations applied estimated from model's outputs.

|                                                          |              |              | Scenarios without gene drives |             |      |     |     |     |                                 |    |    |       | Scenarios with gene drives                                   |                                                             |                                                             |                                                            |                                                                   |                                                                   |                                                                        |    |    |    |    |
|----------------------------------------------------------|--------------|--------------|-------------------------------|-------------|------|-----|-----|-----|---------------------------------|----|----|-------|--------------------------------------------------------------|-------------------------------------------------------------|-------------------------------------------------------------|------------------------------------------------------------|-------------------------------------------------------------------|-------------------------------------------------------------------|------------------------------------------------------------------------|----|----|----|----|
|                                                          |              |              | Intervention(s)               |             |      |     |     |     |                                 |    |    |       |                                                              |                                                             |                                                             |                                                            |                                                                   |                                                                   |                                                                        |    |    |    |    |
|                                                          |              |              | ITNs                          |             |      | ACT |     |     | The combination of ITNs and ACT |    |    |       | 300 gene-drive mosquitoes with X-shredding rates = 1.0 alone | ITNs plus gene drives with X-shredding rates = 0.95 and 1.0 | ITNs plus gene drives with X-shredding rates = 0.95 and 1.0 | ACT plus gene drives with X-shredding rates = 0.95 and 1.0 | ITNs & ACT plus gene drives with X-shredding rates = 0.95 and 1.0 | ITNs & ACT plus gene drives with X-shredding rates = 0.95 and 1.0 | ITNs & ACT plus gene drives with X-shredding rates = 0.9, 0.95 and 1.0 |    |    |    |    |
|                                                          |              |              | Coverage (%)                  |             |      |     |     |     |                                 |    |    |       |                                                              |                                                             |                                                             |                                                            |                                                                   |                                                                   |                                                                        |    |    |    |    |
| Parasite prevalence at the end of the 50-year run-in (%) | Coverage (%) | Interval     | 50                            | 80          | 95   | 50  | 80  | 95  | 50                              | 80 | 95 | Bound | NA                                                           | 80                                                          | 95                                                          | 95                                                         | 50                                                                | 80                                                                | 95                                                                     |    |    |    |    |
| WHO's estimates for Afr E (4)                            |              |              | 49                            | 42          | 41   | 21  | 14  | 12  | 43                              | 35 | 28 | NA    | NA                                                           | NA                                                          | NA                                                          | NA                                                         | NA                                                                | NA                                                                | NA                                                                     | NA |    |    |    |
| Estimates from model's outputs                           | 7.27         | Haut Katanga | Year 1-5                      | Lower bound | -36  | 111 | 37  | 23  | 36                              | NA | NA | NA    | NA                                                           | NA                                                          | NA                                                          | NA                                                         | NA                                                                | NA                                                                | NA                                                                     | NA |    |    |    |
|                                                          |              |              |                               | Upper bound | -355 | 641 | 205 | 184 | 200                             | NA | NA | NA    | NA                                                           | NA                                                          | NA                                                          | NA                                                         | NA                                                                | NA                                                                | NA                                                                     | NA | NA |    |    |
|                                                          |              |              | Year 6-10                     | Lower bound | 9    | 17  | 26  | 11  | 17                              | NA | NA | NA    | NA                                                           | NA                                                          | NA                                                          | NA                                                         | NA                                                                | NA                                                                | NA                                                                     | NA | NA | NA |    |
|                                                          |              |              |                               | Upper bound | 96   | 142 | 89  | 95  | 96                              | NA | NA | NA    | NA                                                           | NA                                                          | NA                                                          | NA                                                         | NA                                                                | NA                                                                | NA                                                                     | NA | NA | NA |    |
|                                                          |              |              | Year 11-15                    | Lower bound | 9    | 17  | 18  | 12  | 17                              | NA | NA | NA    | NA                                                           | NA                                                          | NA                                                          | NA                                                         | NA                                                                | NA                                                                | NA                                                                     | NA | NA | NA | NA |
|                                                          |              |              |                               | Upper bound | 99   | 98  | 91  | 97  | 99                              | NA | NA | NA    | NA                                                           | NA                                                          | NA                                                          | NA                                                         | NA                                                                | NA                                                                | NA                                                                     | NA | NA | NA | NA |

|       |               |            |             |             |      |     |    |    |     |     |    |             |        |    |    |    |    |    |    |
|-------|---------------|------------|-------------|-------------|------|-----|----|----|-----|-----|----|-------------|--------|----|----|----|----|----|----|
| 20.81 | Kwango        | Year 1-5   | -60         | 51          | 26   | -24 | 23 | 9  | 47  | 11  | 8  | Lower bound | -340   | NA | 32 | NA | NA | 20 | NA |
|       |               |            | Upper bound | -3,382      | NA   | 175 | NA | NA | 101 | NA  |    |             |        |    |    |    |    |    |    |
|       |               | Year 6-10  | -           | -494        | -156 | 55  | 17 | 12 | 112 | 59  | 9  | Lower bound | 9      | NA | 17 | NA | NA | 18 | NA |
|       |               |            | -427        | Upper bound | 85   | NA  | 95 | NA | NA  | 94  | NA |             |        |    |    |    |    |    |    |
|       |               | Year 11-15 | -           | -117        | -106 | 18  | 11 | 9  | 120 | 89  | 8  | Lower bound | 8      | NA | 16 | NA | NA | 18 | NA |
|       |               |            | -275        | Upper bound | 82   | NA  | 90 | NA | NA  | 91  | NA |             |        |    |    |    |    |    |    |
| 29.65 | Kasai Central | Year 1-5   | -69         | 51          | 26   | -29 | 11 | 8  | 46  | 11  | 8  | Lower bound | 11,661 | NA | 32 | NA | NA | 20 | NA |
|       |               |            | Upper bound | 116,124     | NA   | 176 | NA | NA | 103 | NA  |    |             |        |    |    |    |    |    |    |
|       |               | Year 6-10  | -           | -245        | -161 | 64  | 20 | 14 | 157 | 68  | 9  | Lower bound | 9      | NA | 18 | NA | NA | 19 | NA |
|       |               |            | -175        | Upper bound | 87   | NA  | 97 | NA | NA  | 97  | NA |             |        |    |    |    |    |    |    |
|       |               | Year 11-15 | -           | -102        | -81  | 20  | 11 | 9  | 142 | 121 | 9  | Lower bound | 8      | NA | 16 | NA | NA | 18 | NA |
|       |               |            | -220        | Upper bound | 83   | NA  | 91 | NA | NA  | 92  | NA |             |        |    |    |    |    |    |    |
| 45.03 | Nord Ubangui  | Year 1-5   | -64         | 53          | 30   | -27 | 20 | 8  | 48  | 11  | 8  | Lower bound | 82     | NA | 31 | NA | NA | 20 | NA |
|       |               |            | Upper bound | 816         | NA   | 172 | NA | NA | 102 | NA  |    |             |        |    |    |    |    |    |    |
|       |               | Year 6-10  | -           | -925        | -206 | 125 | 22 | 15 | 138 | 66  | 9  | Lower bound | 9      | NA | 17 | NA | NA | 19 | NA |
|       |               |            | -168        | Upper bound | 88   | NA  | 96 | NA | NA  | 98  | NA |             |        |    |    |    |    |    |    |
|       |               | Year 11-15 | -           | -96         | -82  | 17  | 10 | 9  | 129 | 98  | 8  | Lower bound | 8      | NA | 16 | NA | NA | 17 | NA |
|       |               |            | -419        | Upper bound | 82   | NA  | 89 | NA | NA  | 91  | NA |             |        |    |    |    |    |    |    |



|       |          |            |             |             |             |     |    |    |     |     |    |             |    |    |    |    |    |    |    |
|-------|----------|------------|-------------|-------------|-------------|-----|----|----|-----|-----|----|-------------|----|----|----|----|----|----|----|
| 51.64 | Bas Uele | Year 0-5   | -81         | 61          | 29          | -36 | 19 | 8  | 48  | 12  | 10 | Lower bound | 65 | NA | NA | NA | NA | 20 | 16 |
|       |          |            | Upper bound | 645         | NA          | NA  | NA | NA | 105 | 87  |    |             |    |    |    |    |    |    |    |
|       |          | Year 6-10  | -           | -606        | -322        | 117 | 22 | 15 | 140 | 170 | 9  | Lower bound | 9  | NA | NA | NA | NA | 19 | 18 |
|       |          |            | 181         | Upper bound | 87          | NA  | NA | NA | NA  | 97  | 96 |             |    |    |    |    |    |    |    |
|       |          | Year 11-15 | -           | -81         | -73         | 19  | 11 | 9  | 180 | 111 | 9  | Lower bound | 8  | NA | NA | NA | NA | 18 | 17 |
|       |          |            | 204         | Upper bound | 82          | NA  | NA | NA | NA  | 91  | 90 |             |    |    |    |    |    |    |    |
| 52.33 | Kinshasa | Year 1-5   | -           | 104         | 51          | -89 | 19 | 9  | 67  | 17  | 10 | Lower bound | 77 | NA | NA | NA | NA | 25 | 18 |
|       |          |            | 103         | Upper bound | 765         | NA  | NA | NA | NA  | 129 | 97 |             |    |    |    |    |    |    |    |
|       |          | Year 6-10  | -           | -366        | -           | 110 | 20 | 13 | 181 | 69  | 23 | Lower bound | 9  | NA | NA | NA | NA | 19 | 18 |
|       |          |            | 170         | 1,602       | Upper bound | 88  | NA | NA | NA  | NA  | 98 | 97          |    |    |    |    |    |    |    |
|       |          | Year 11-15 | -           | -118        | -98         | 18  | 10 | 8  | 143 | 82  | 36 | Lower bound | 8  | NA | NA | NA | NA | 17 | 17 |
|       |          |            | 271         | Upper bound | 81          | NA  | NA | NA | NA  | 91  | 90 |             |    |    |    |    |    |    |    |
| 54.33 | Equateur | Year 1-5   | -           | 76          | 40          | -86 | 17 | 8  | 53  | 40  | 9  | Lower bound | 55 | NA | NA | NA | NA | 23 | 17 |
|       |          |            | 104         | Upper bound | 547         | NA  | NA | NA | NA  | 120 | 91 |             |    |    |    |    |    |    |    |
|       |          | Year 6-10  | -           | 5,457       | -706        | 115 | 21 | 13 | 143 | 75  | 19 | Lower bound | 9  | NA | NA | NA | NA | 19 | 18 |
|       |          |            | 180         | Upper bound | 88          | NA  | NA | NA | NA  | 98  | 97 |             |    |    |    |    |    |    |    |
|       |          | Year 11-15 | -           | -75         | -74         | 20  | 12 | 9  | 164 | 115 | 31 | Lower bound | 8  | NA | NA | NA | NA | 18 | 17 |
|       |          |            | 252         | Upper bound | 83          | NA  | NA | NA | NA  | 92  | 91 |             |    |    |    |    |    |    |    |

- Note for Table S2:
- 1) NA: Not applicable
  - 2) The scenarios that could achieve malaria elimination when adding gene drives were highlighted in green.
  - 3) \$int: International Dollars
  - 4) upper bound: upper bound price, lower bound: lower bound price

Table S3 Incremental cost-effectiveness ratio in year 1-5 after applying intervention(s)

|                               |                                                              |          |       | ICER<br>(\$int per DALY averted) |                    |                                   |                    |                                  |                    |
|-------------------------------|--------------------------------------------------------------|----------|-------|----------------------------------|--------------------|-----------------------------------|--------------------|----------------------------------|--------------------|
|                               |                                                              |          |       | The first interval:<br>year 1-5  |                    | The second interval:<br>year 6-10 |                    | The last interval:<br>year 11-15 |                    |
| Intervention                  |                                                              | Coverage | Label | Lower bound                      | Upper bound        | Lower bound                       | Upper bound        | Lower bound                      | Upper bound        |
| Scenarios without gene drives | ITNs                                                         | 50%      | A     | dominated                        | dominated          | negative                          | dominated          | negative                         | dominated          |
|                               |                                                              | 80%      | B     | dominated                        | dominated          | negative                          | dominated          | negative                         | dominated          |
|                               |                                                              | 95%      | C     | 6.52                             | 6.52               | negative                          | dominated          | negative                         | dominated          |
|                               | ACT                                                          | 50%      | D     | negative                         | negative           | negative                          | negative           | negative                         | negative           |
|                               |                                                              | 80%      | E     | negative                         | negative           | negative                          | negative           | negative                         | negative           |
|                               |                                                              | 95%      | F     | <b>First point</b>               | <b>First point</b> | negative                          | <b>First point</b> | negative                         | <b>First point</b> |
|                               | ITNs & ACT                                                   | 50%      | G     | dominated                        | dominated          | negative                          | dominated          | negative                         | dominated          |
|                               |                                                              | 80%      | H     | 0.43                             | 0.43               | dominated                         | 2.82               | dominated                        | dominated          |
|                               |                                                              | 95%      | I     | 0.23                             | 0.23               | dominated                         | 0.25               | dominated                        | 0.30               |
| Scenarios with gene drives    | 300 gene drive mosquitoes with X-shredding rates = 1.0 alone | NA       | J     | dominated                        | dominated          | <b>First point</b>                | 2.62               | <b>First point</b>               | 2.76               |
|                               | ITNs plus gene drives with X-shredding rates = 0.95 and 1.0  | 80       | K     | dominated                        | dominated          | dominated                         | 2.90               | dominated                        | 3.42               |
|                               | ITNs plus gene drives with X-shredding rates = 0.95 and 1.0  | 95       | L     | 1.67                             | 10.56              | dominated                         | 3.23               | dominated                        | 3.07               |

|                                                                        |    |   |      |       |           |      |           |      |
|------------------------------------------------------------------------|----|---|------|-------|-----------|------|-----------|------|
| ACT plus gene drives with X-shredding rates = 0.95 and 1.0             | 95 | M | 1.22 | 12.10 | 9.74      | 2.68 | dominated | 3.12 |
| ITNs & ACT plus gene drives with X-shredding rates = 0.95 and 1.0      | 50 | N | 2.12 | 13.66 | 28.36     | 2.85 | dominated | 3.33 |
| ITNs & ACT plus gene drives with X-shredding rates = 0.95 and 1.0      | 80 | O | 0.69 | 4.06  | dominated | 2.93 | 20.99     | 3.03 |
| ITNs & ACT plus gene drives with X-shredding rates = 0.9, 0.95 and 1.0 | 95 | P | 0.51 | 3.14  | dominated | 2.92 | 17.93     | 2.99 |

**Keys for Table S3:**

- ICER: Incremental cost-effectiveness ratio
- Negative: the incremental cost and the incremental effect are negative
- Dominated: the incremental cost is positive, and the incremental effect is negative
- Vector control strategies that could reach malaria elimination were highlighted in green.
- **Incremental cost-effectiveness ratio (ICER)** is defined as the incremental change in cost, divided by the incremental change in its effectiveness. The first, second, and third points of each expansion path were highlighted in red, orange, and yellow accordingly.
