# Supplementary material for: Modeling impact and cost-effectiveness of gene drives for malaria elimination in the Democratic Republic of the Congo
Source: bioRxiv or medRxiv preprint supplement (doi:10.1101/2020.06.29.20142760), 2021-02-22
Supplement: Supplementary file [file media-1.pdf]

- 1 **Supplementary: Modeling impact and cost-effectiveness of gene drives for malaria elimination in the Democratic Republic of the Congo**
- 2 **Congo**
- 3 **Supplementary 1, Non-spatial simulation framework: number and frequency of driving-Y gene-drive mosquitoes released.**

4 **Baseline observed throughout 15-year simulation timeframe in the spatial framework of eight study locations:**

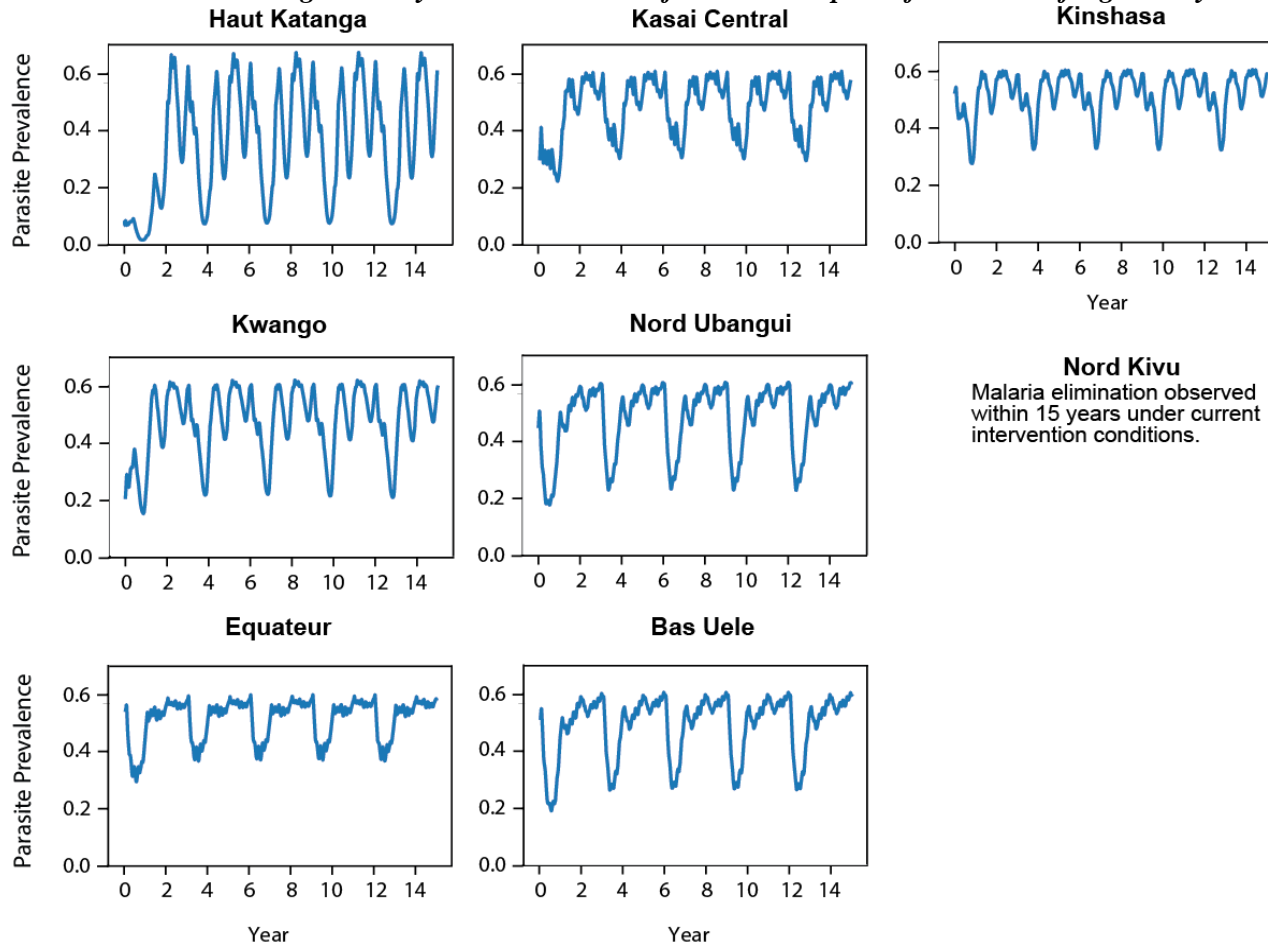

5

Supplementary: Modeling impact and cost-effectiveness of gene drives for malaria elimination in the Democratic Republic of the Congo

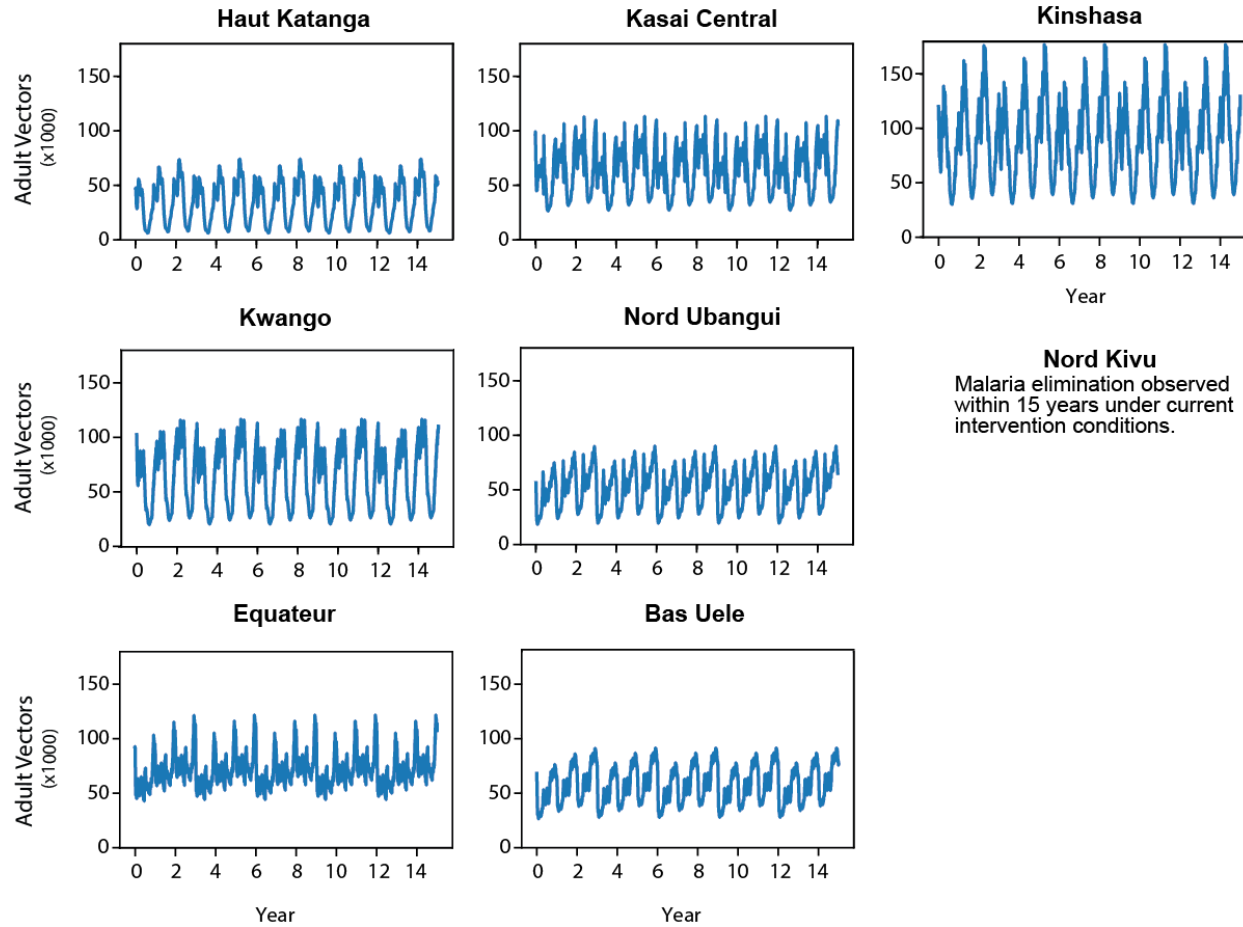

6

7 Simulation outputs by site:

Bas Uele

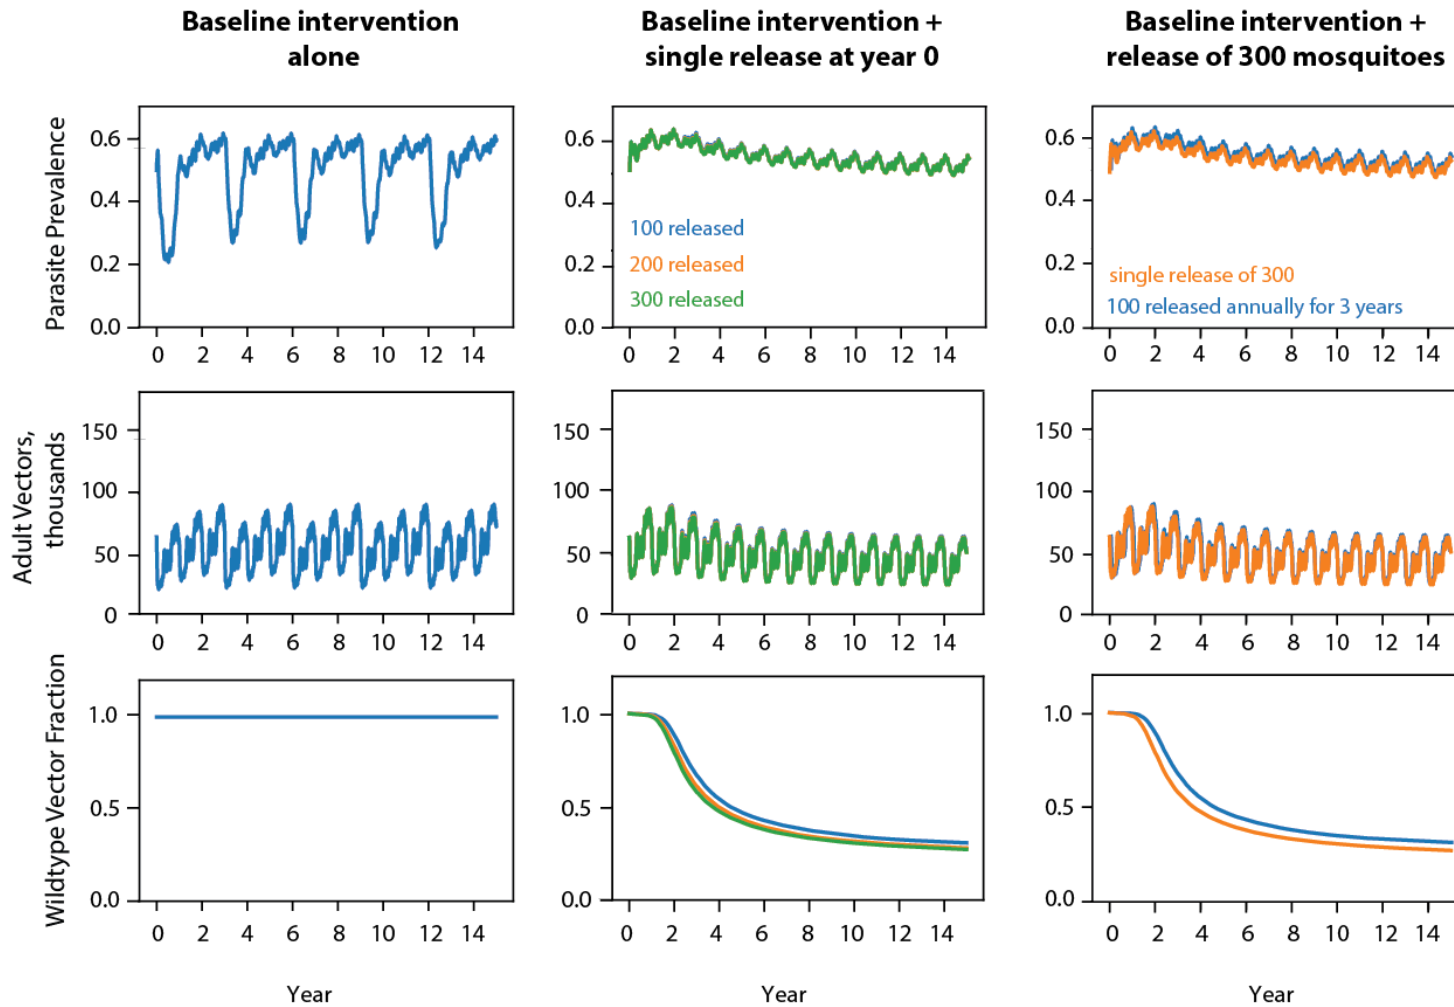

**Equateur**

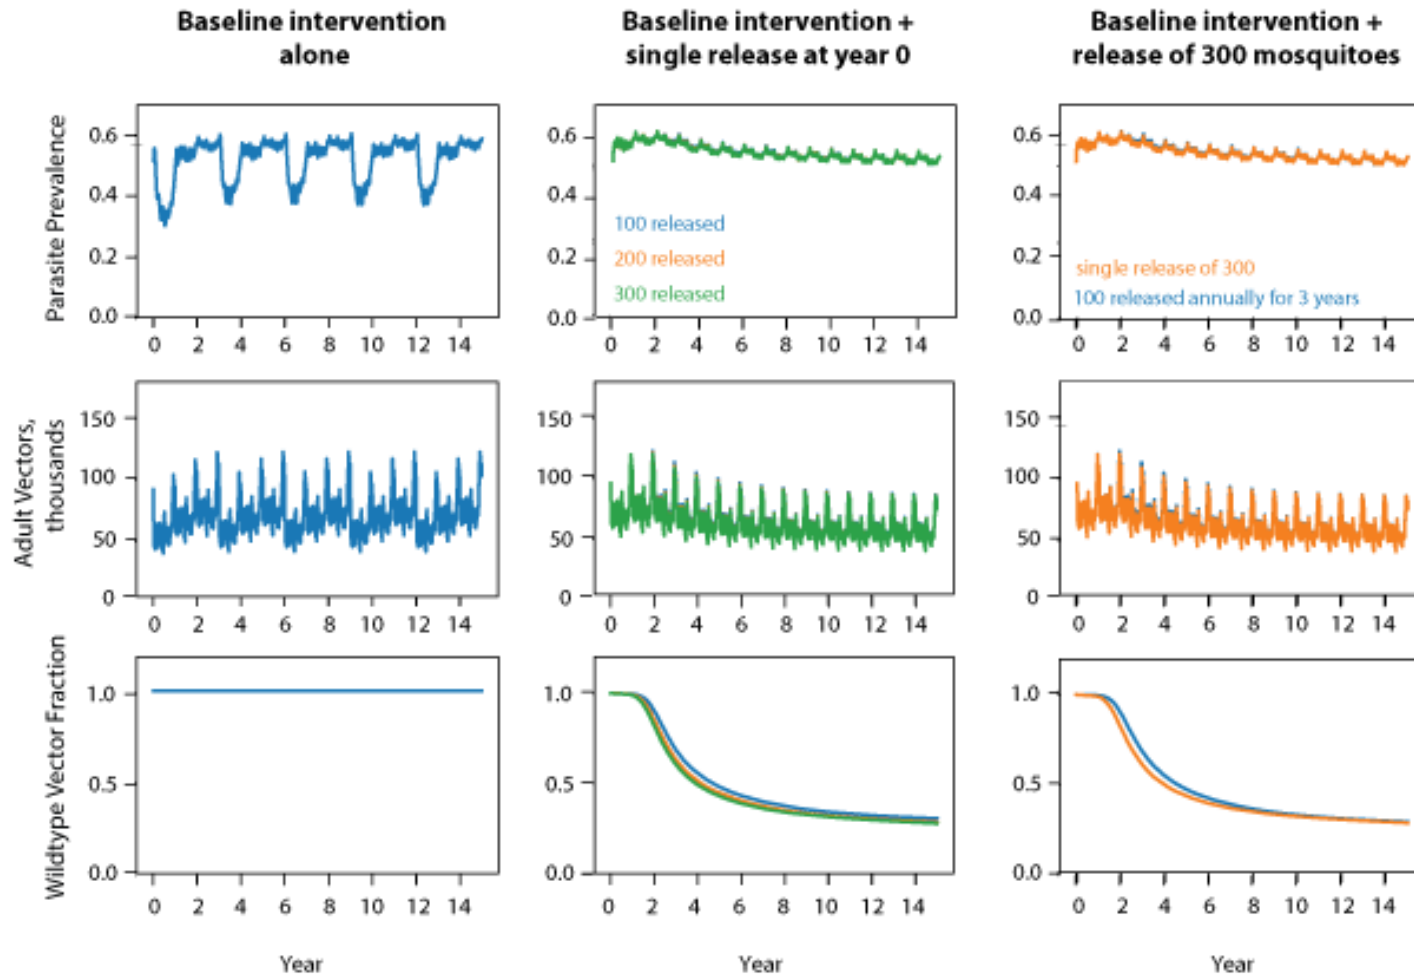

**Haut Katanga**

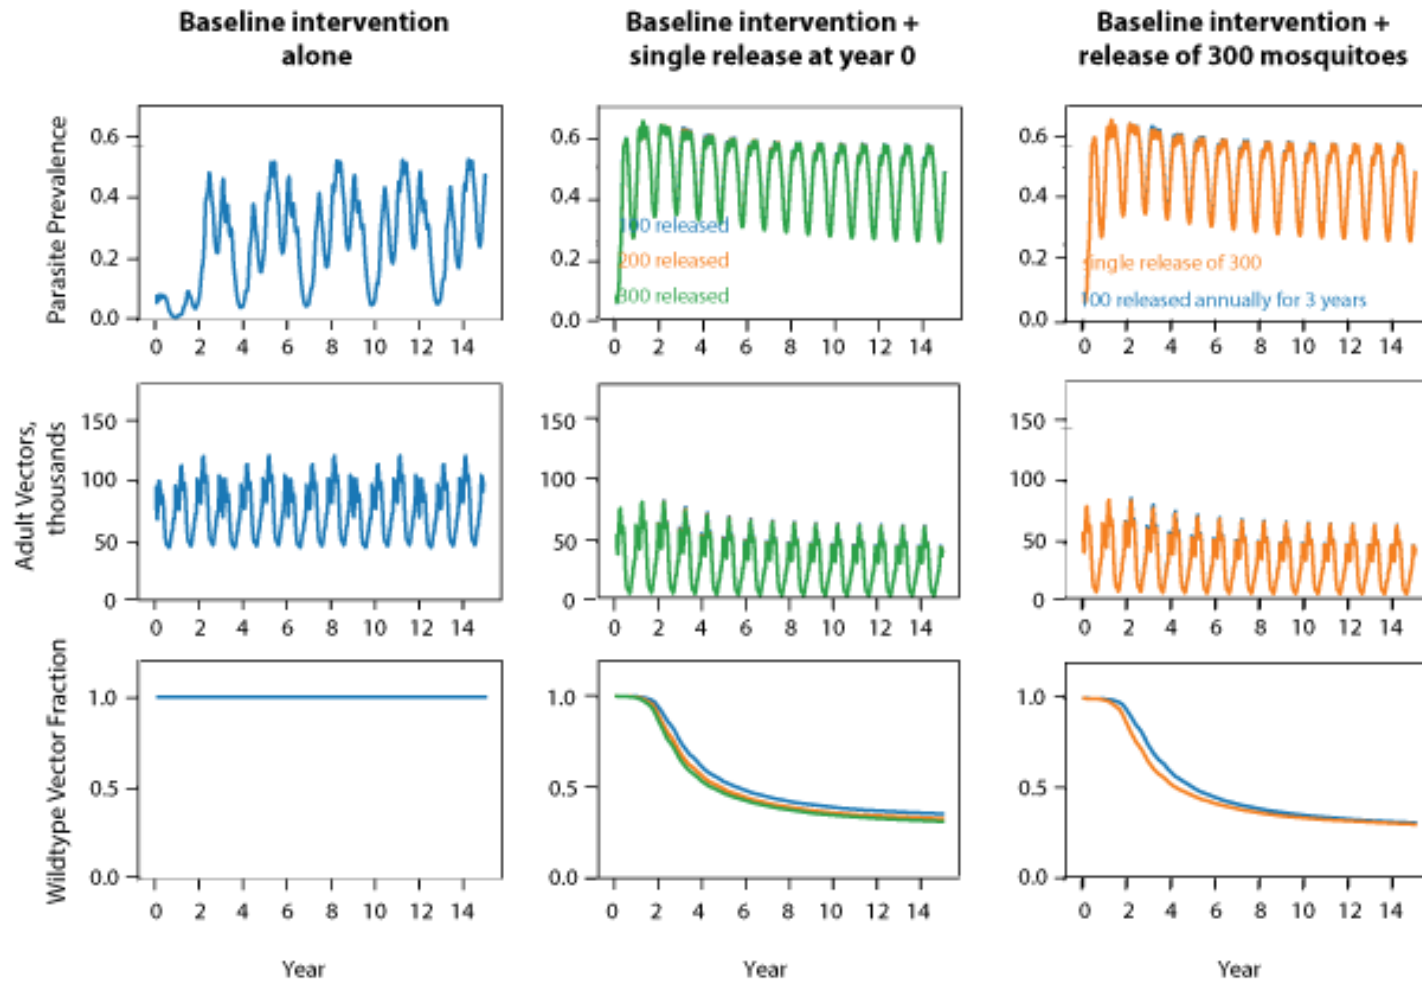

**Kasai Central**

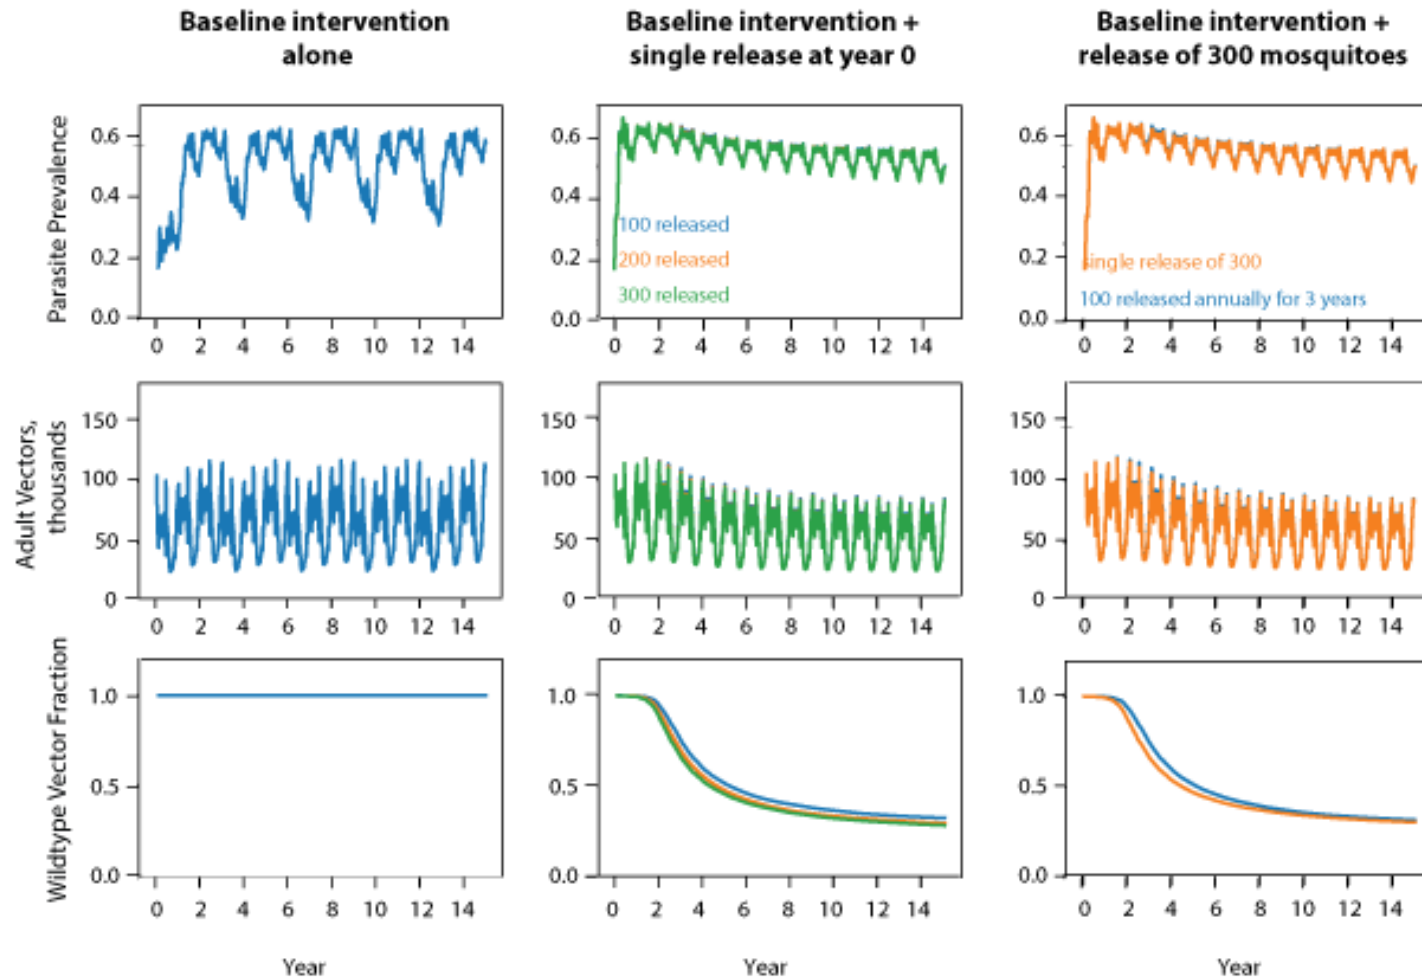

**Kinshasa**

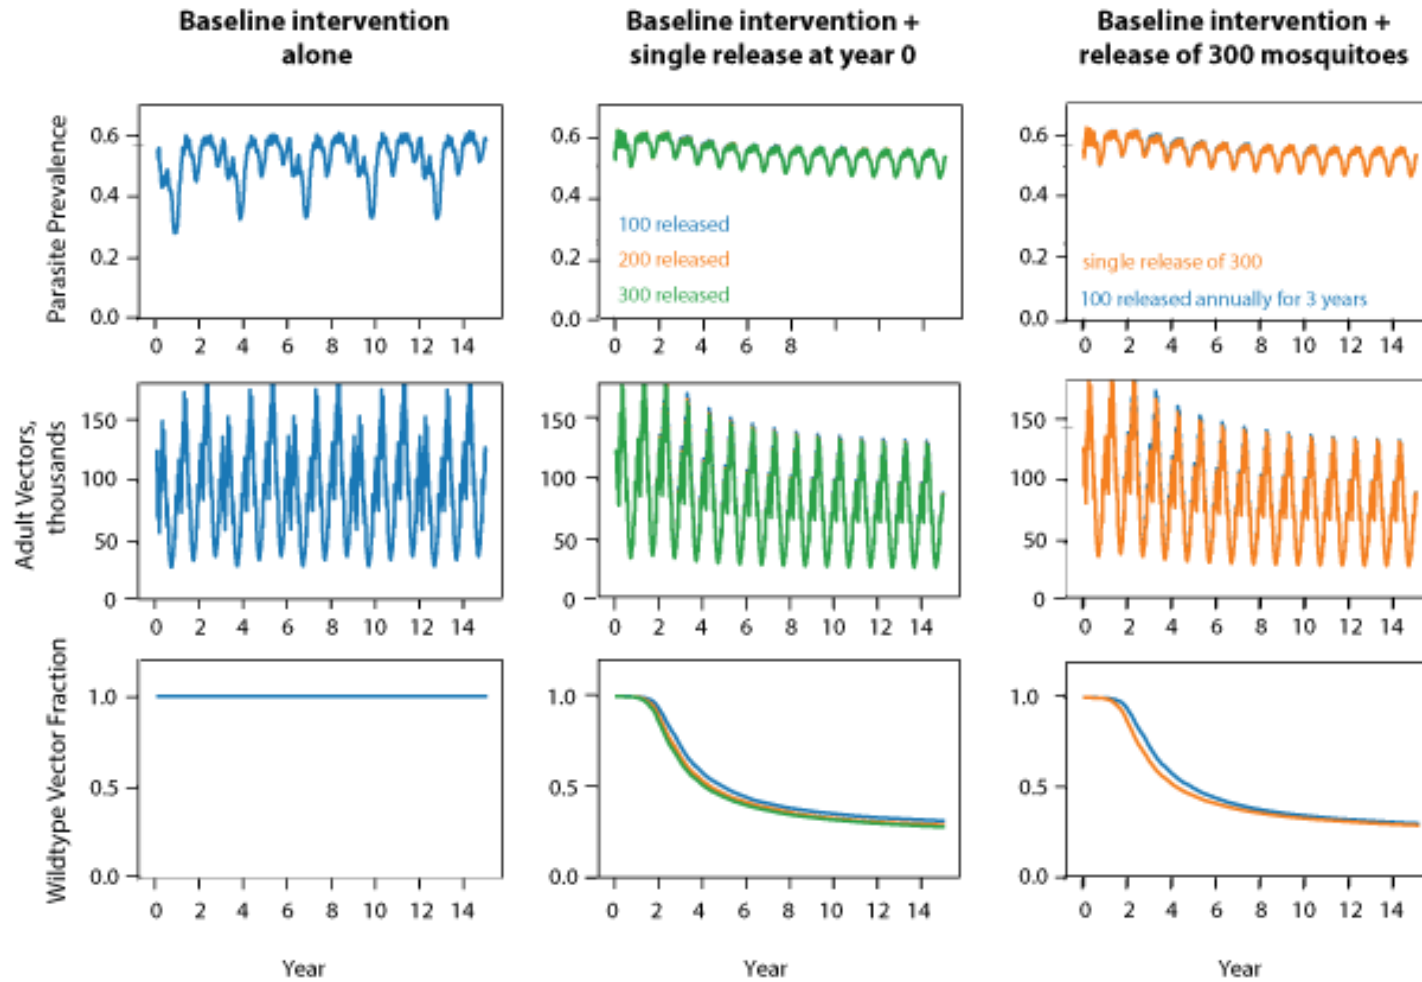

**Kwango**

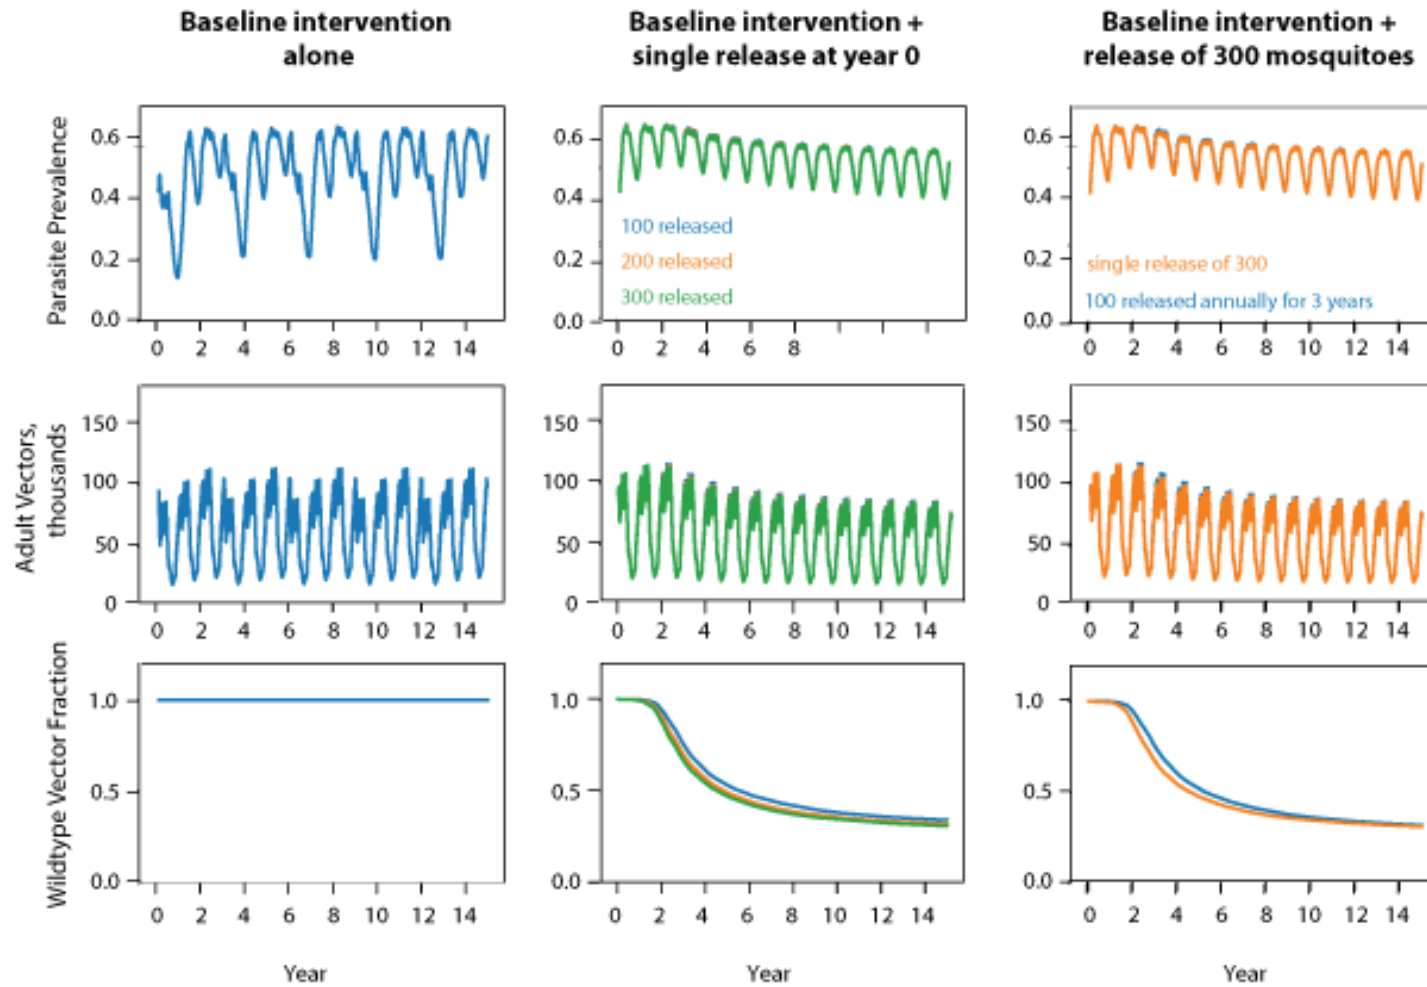



**Nord Ubangui**

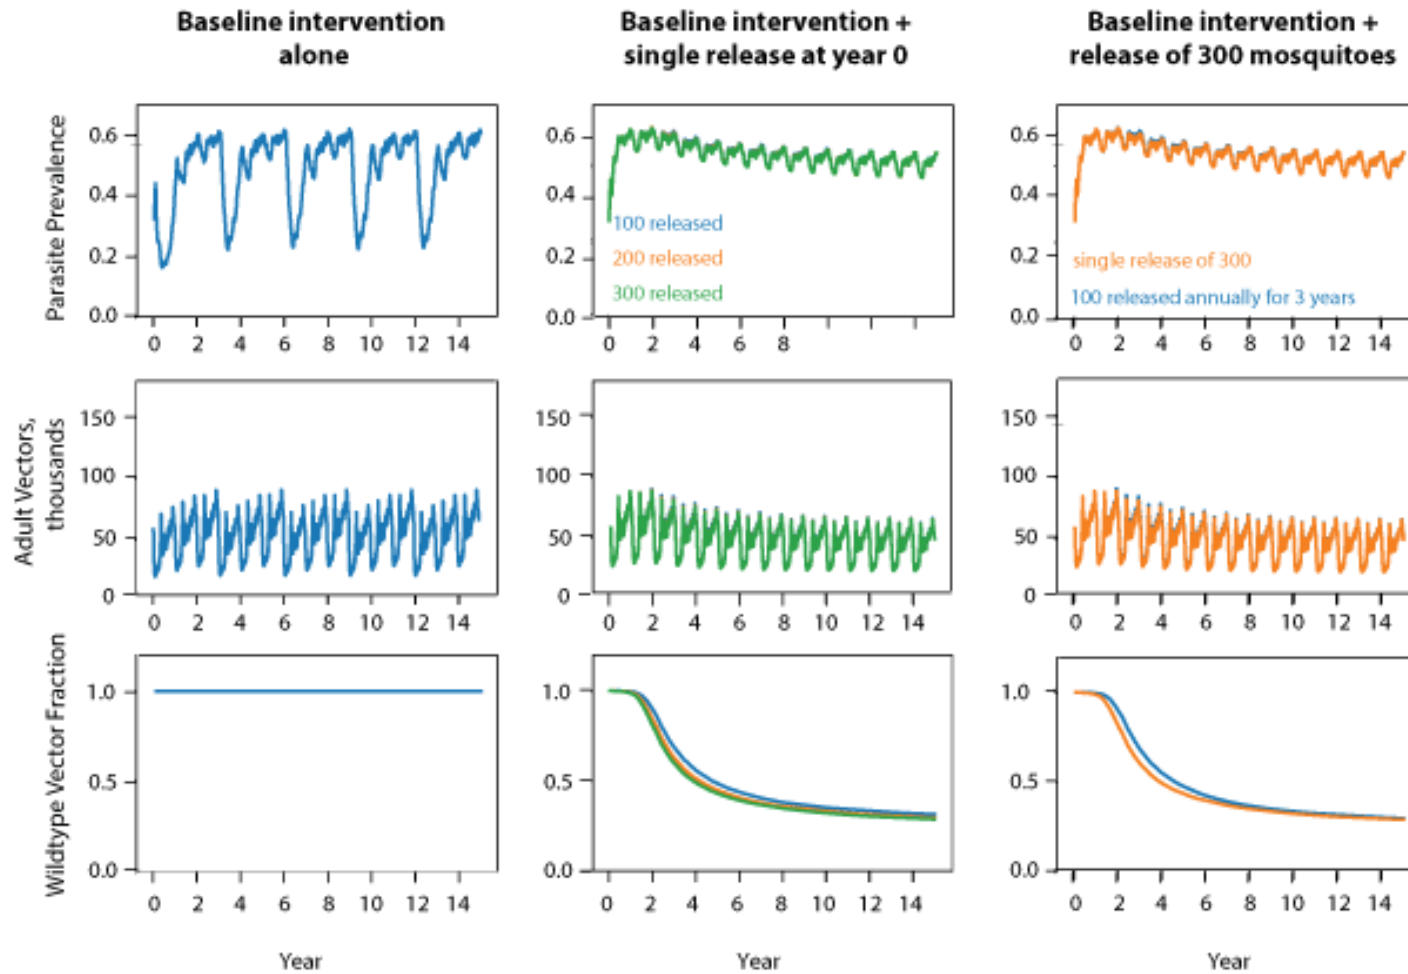

14 **Supplementary 2, Non-spatial simulation framework: driving-Y parameters of gene-drive**  
15 **mosquitoes single release at year 0.**

Basuele

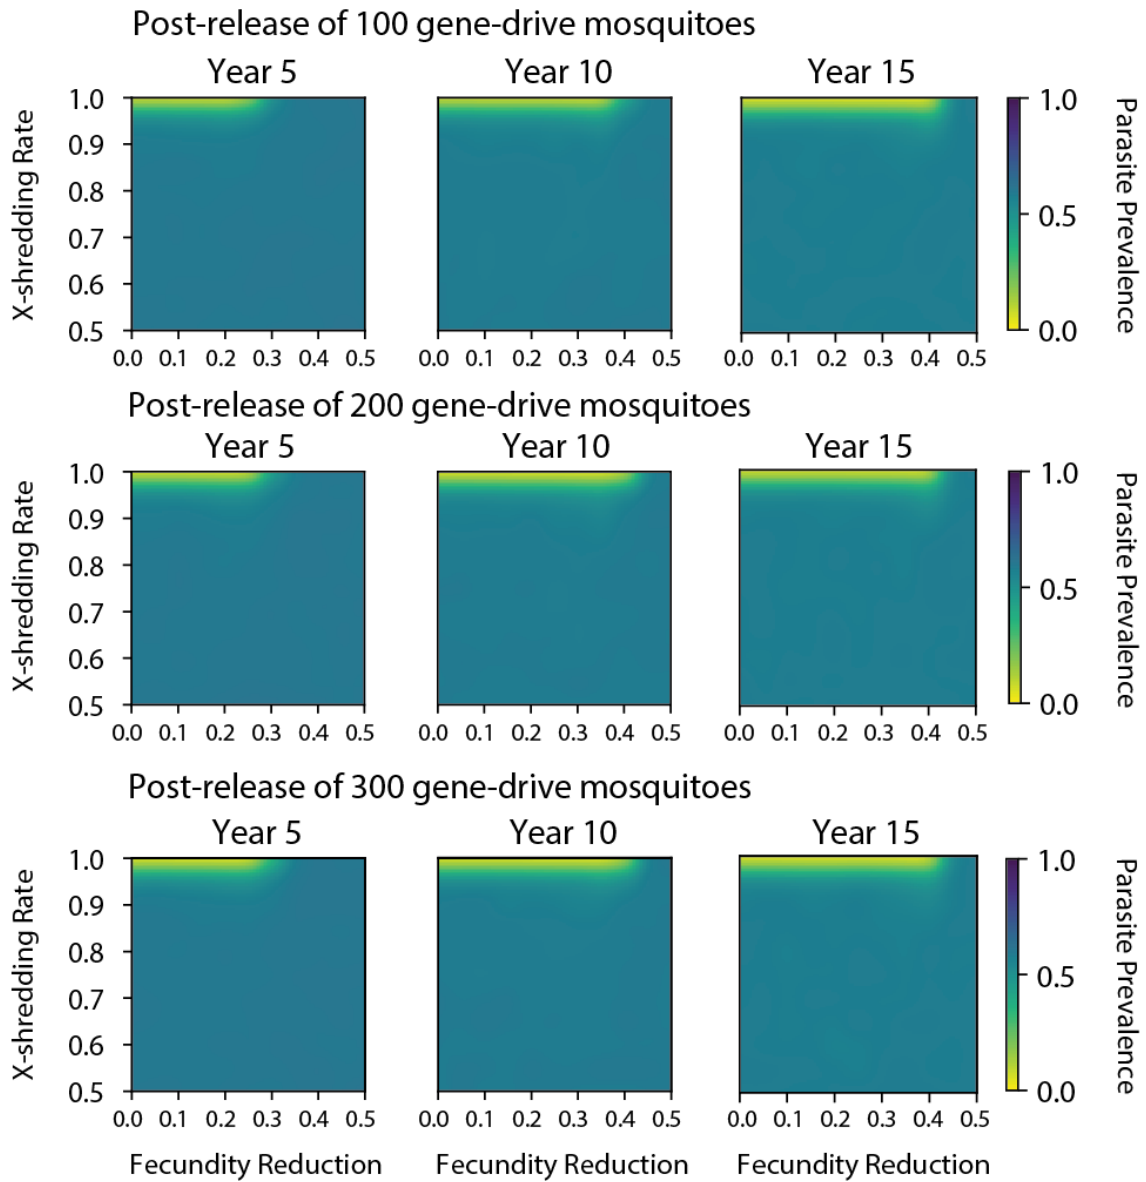

16

Equateur

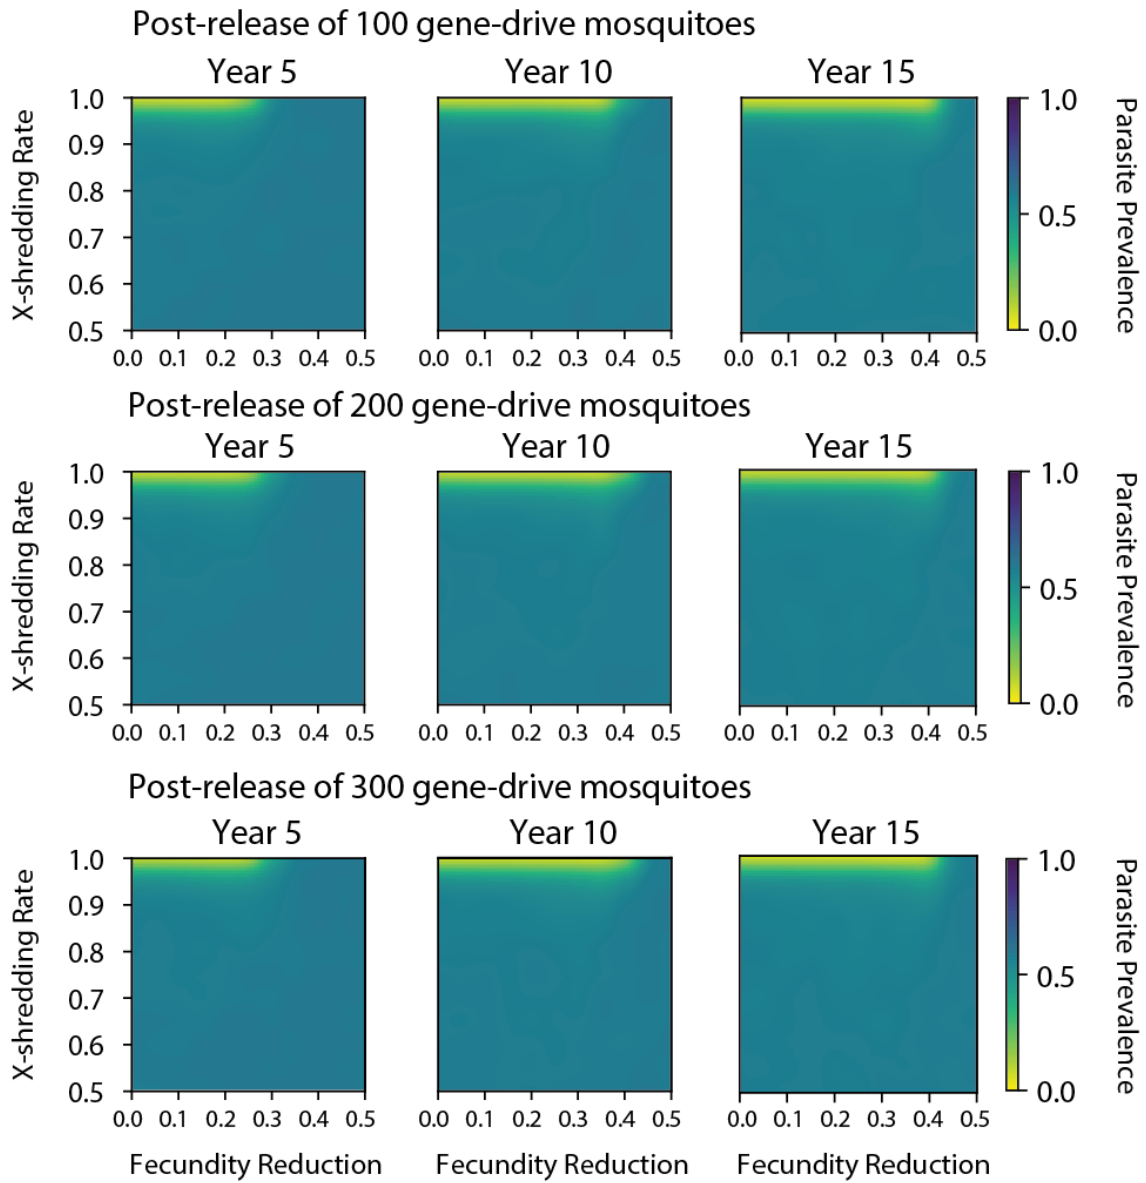

Haut Katanga

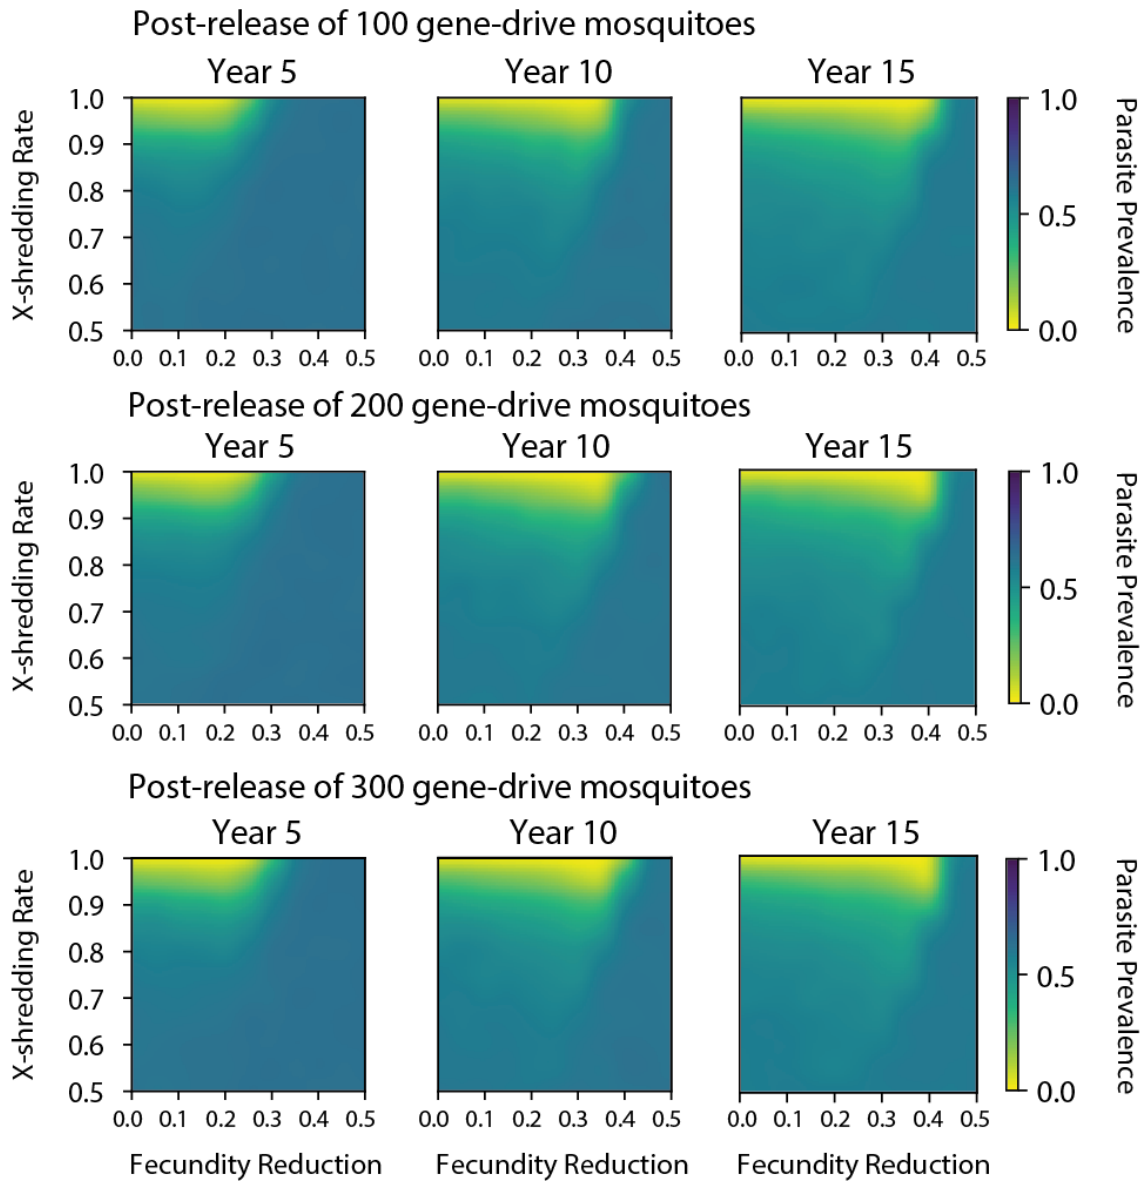

Kasai Central

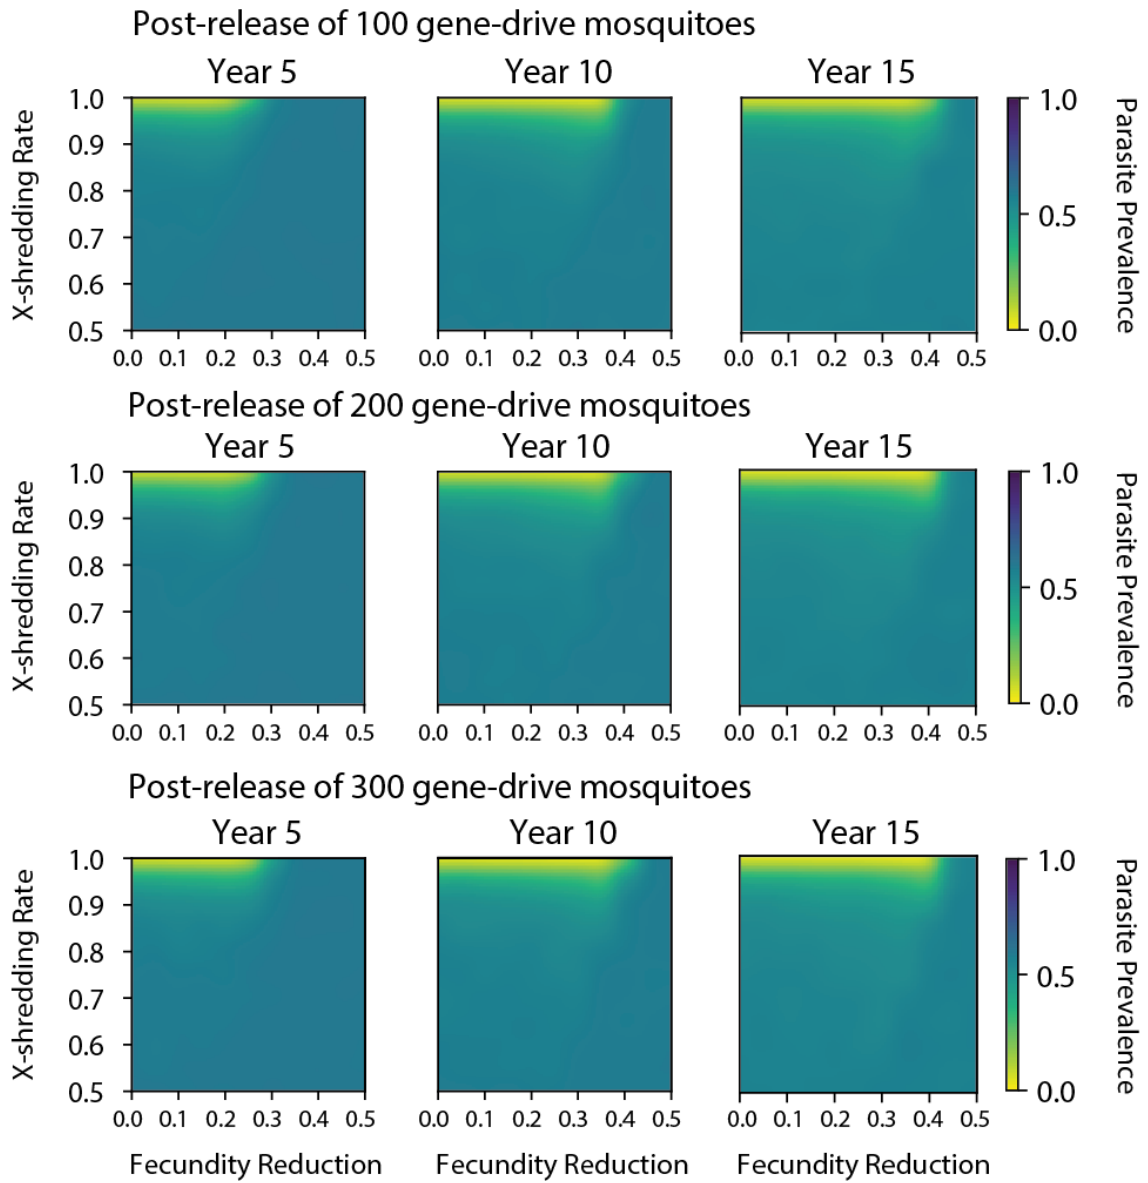

Kinshasa

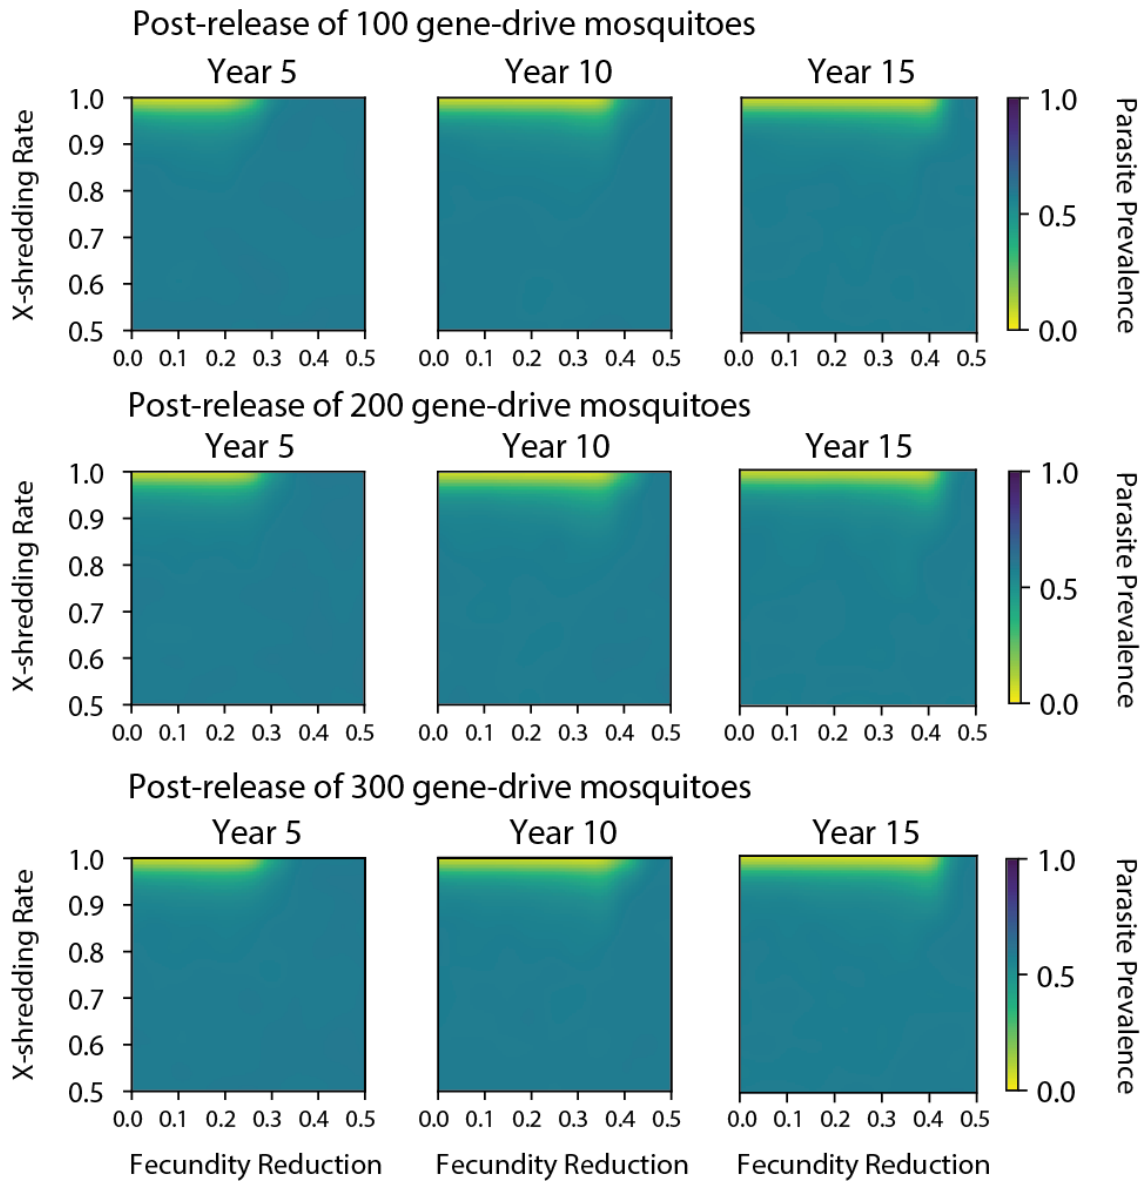

Kwango

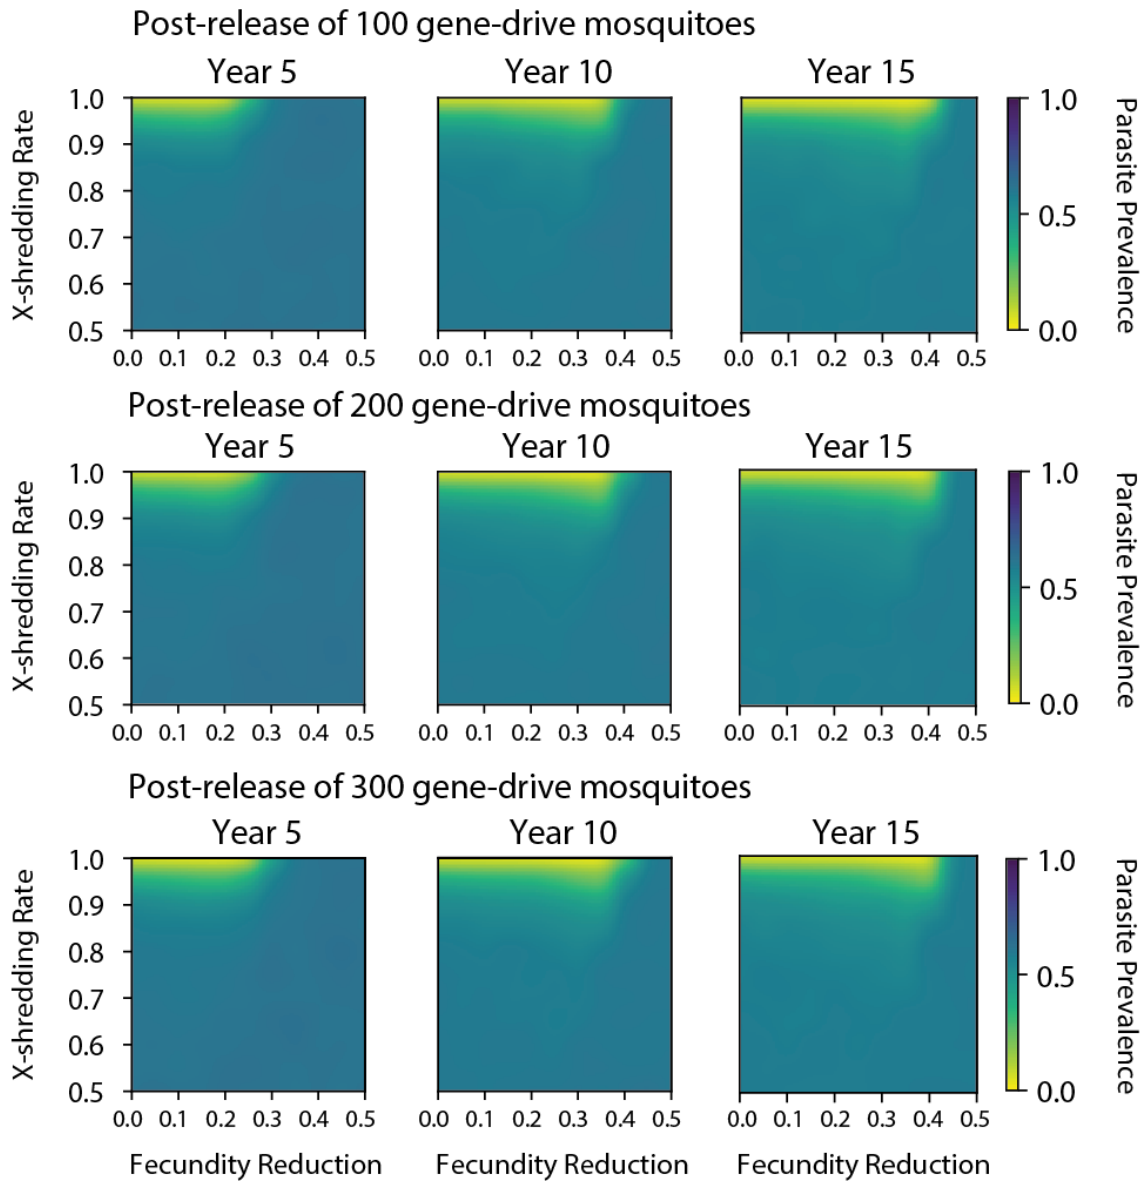

Nord Ubangui

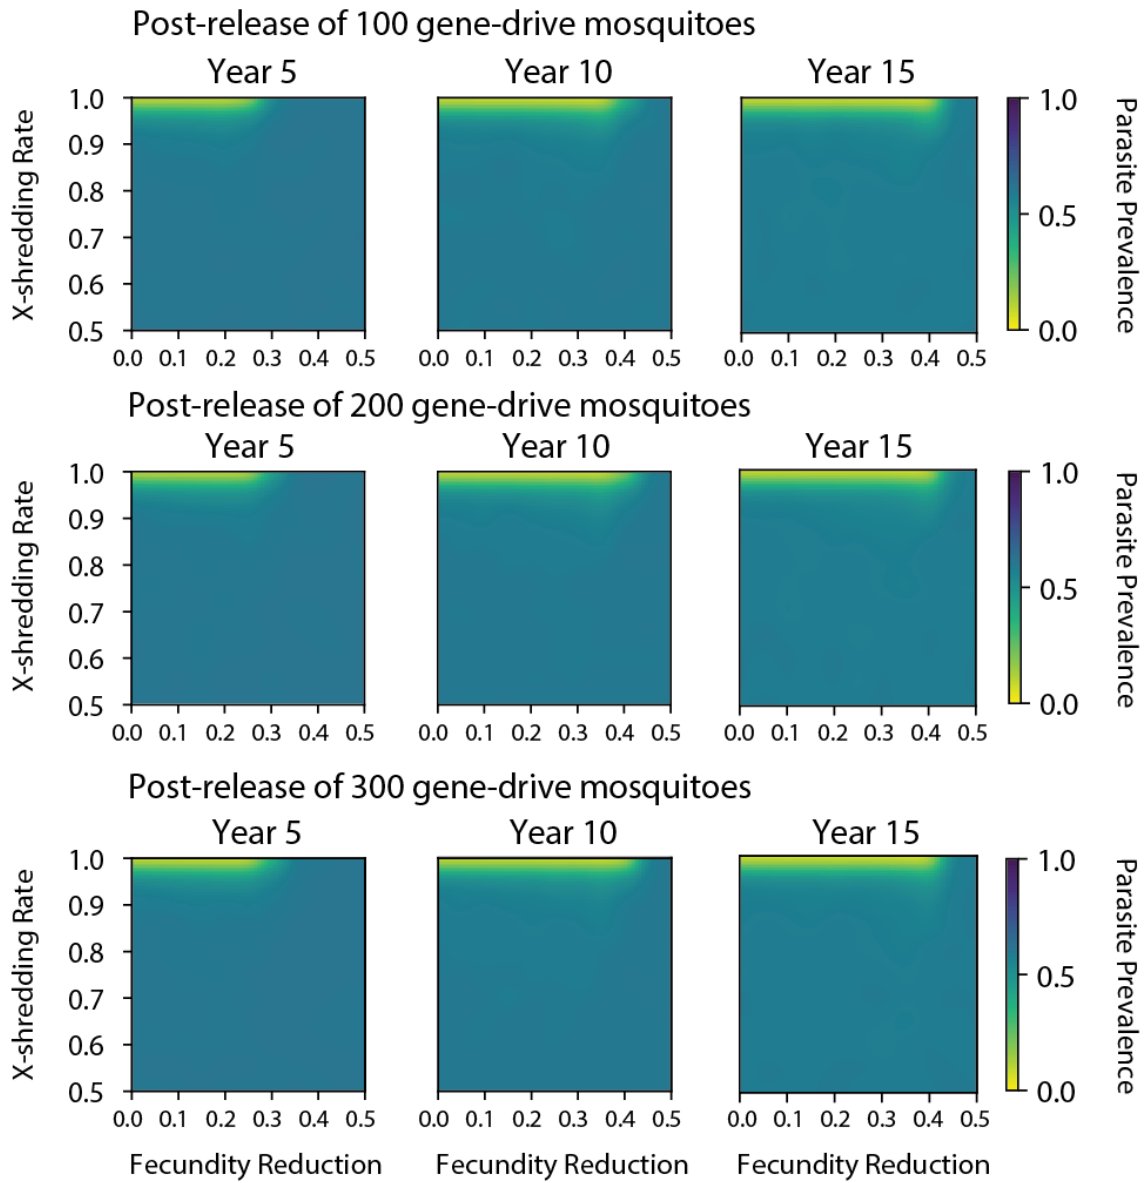



23 **Supplementary 3, Non-spatial simulation framework: ratio between current and initial**  
24 **numbers of adult vectors, 15-year post- single release of 300 drive mosquitoes at year 0.**  
25

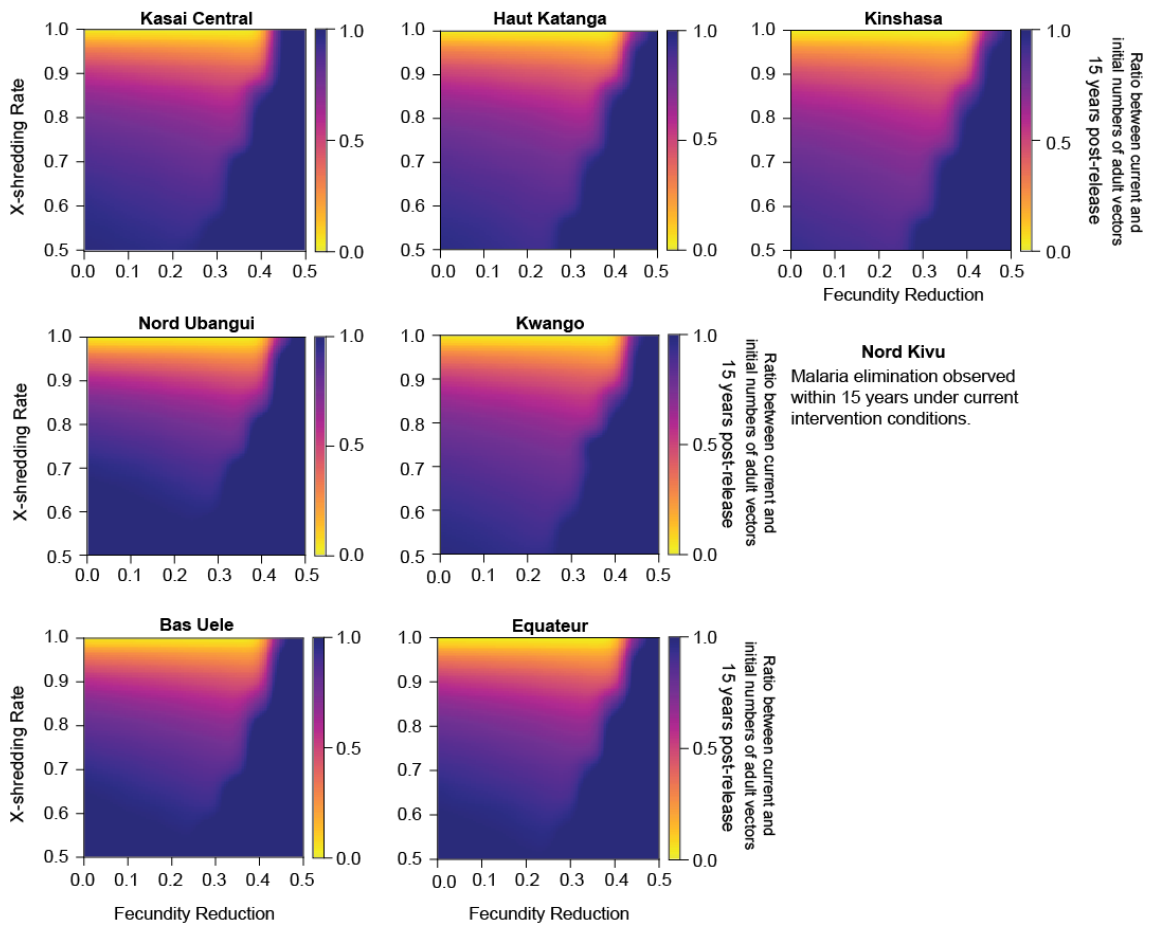

26

27 **Supplementary 4: Spatial simulation framework: simulation outputs.**

**Bas Uele - scenarios without gene drives**

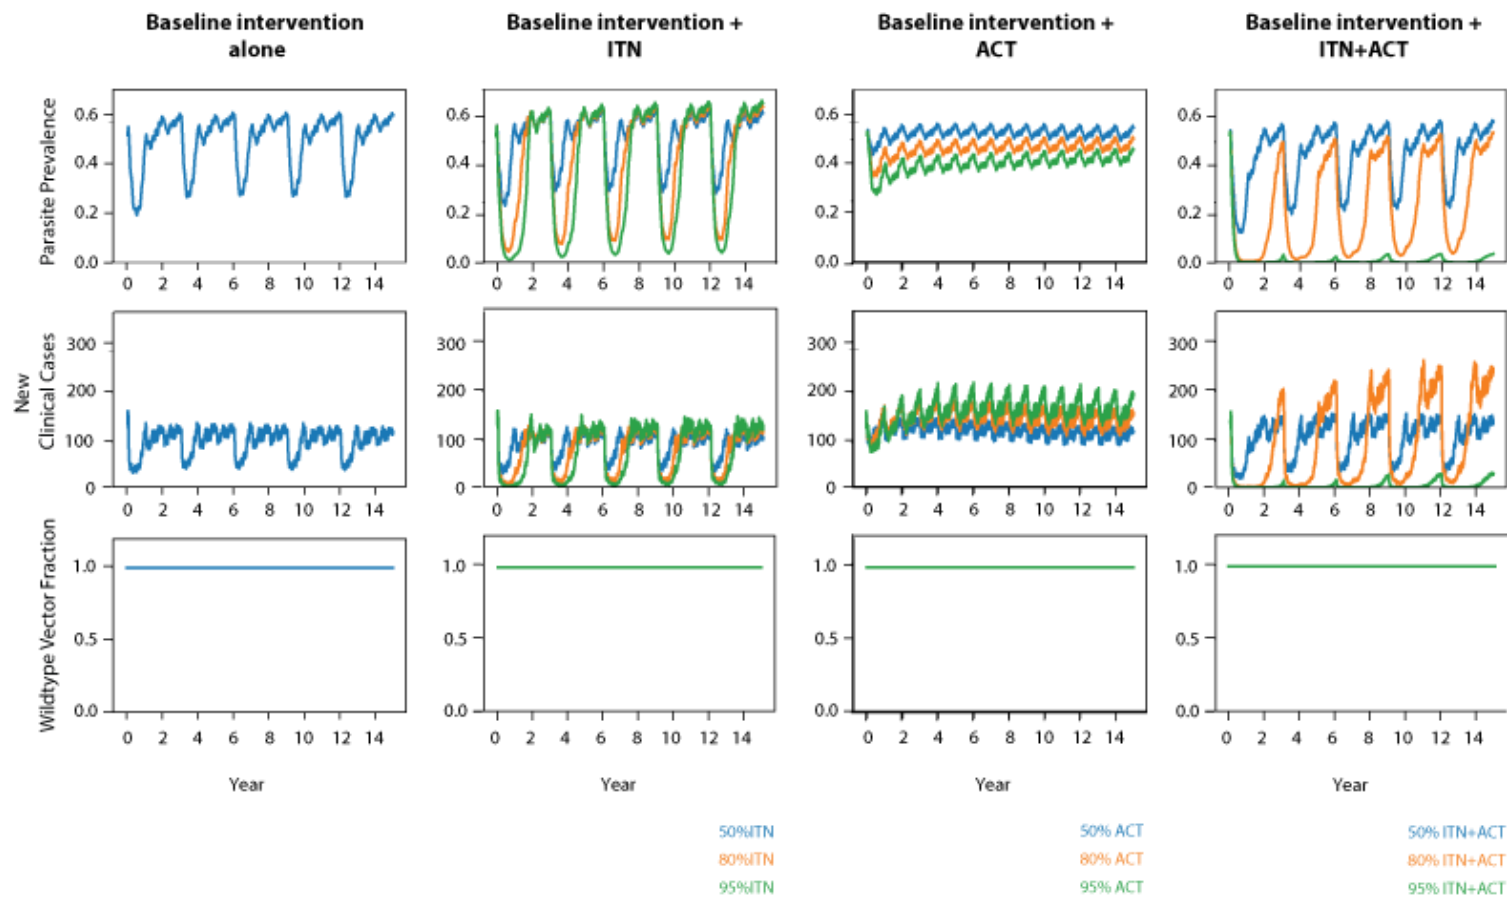

28

Supplementary: Modeling impact and cost-effectiveness of gene drives for malaria elimination in the Democratic Republic of the Congo

Bas Uele - scenarios with 300 gene drives released at year 0

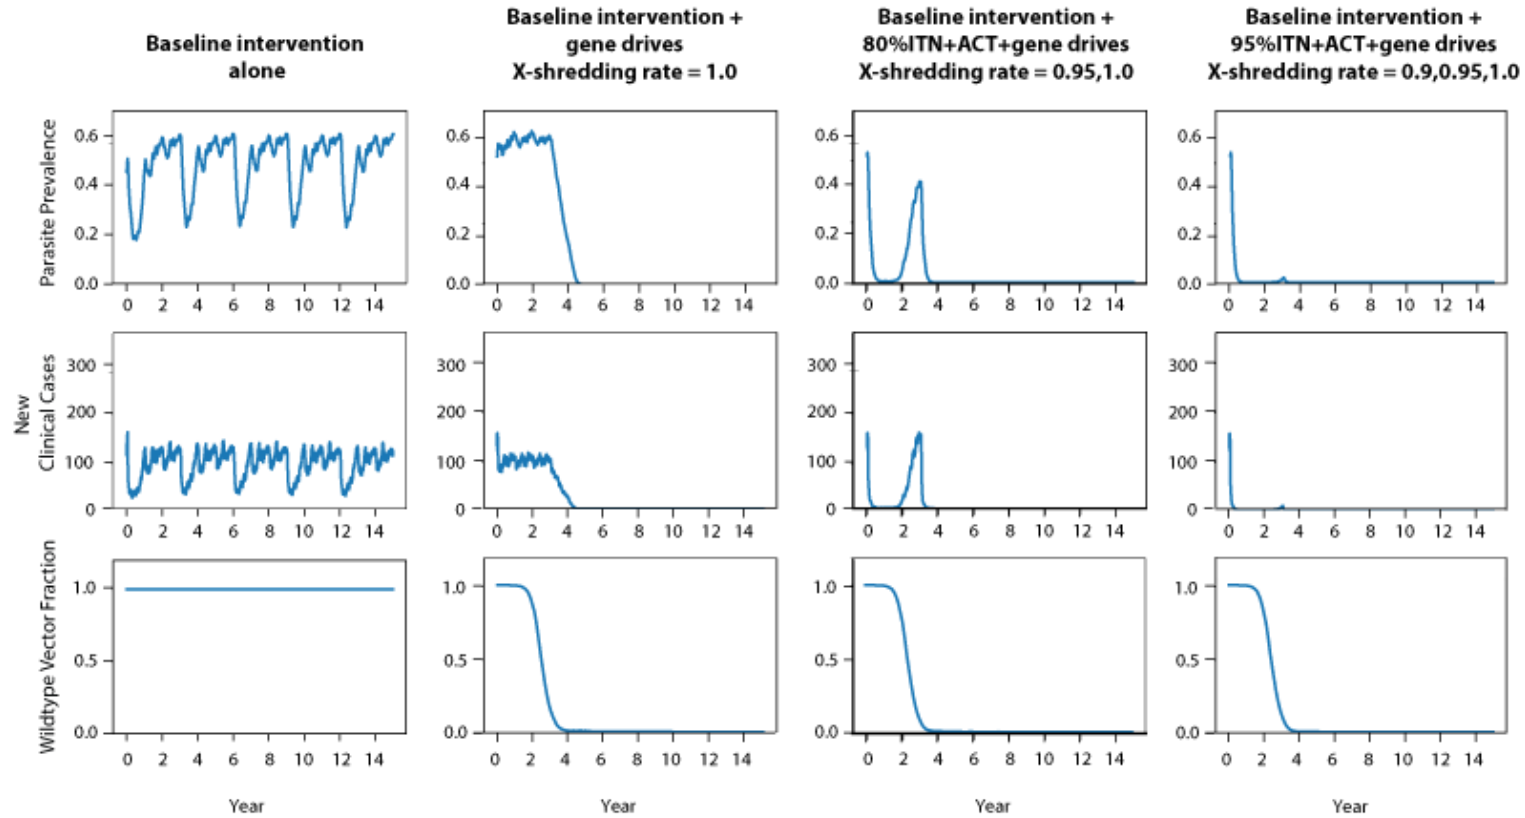

**Equateur - scenarios without gene drives**

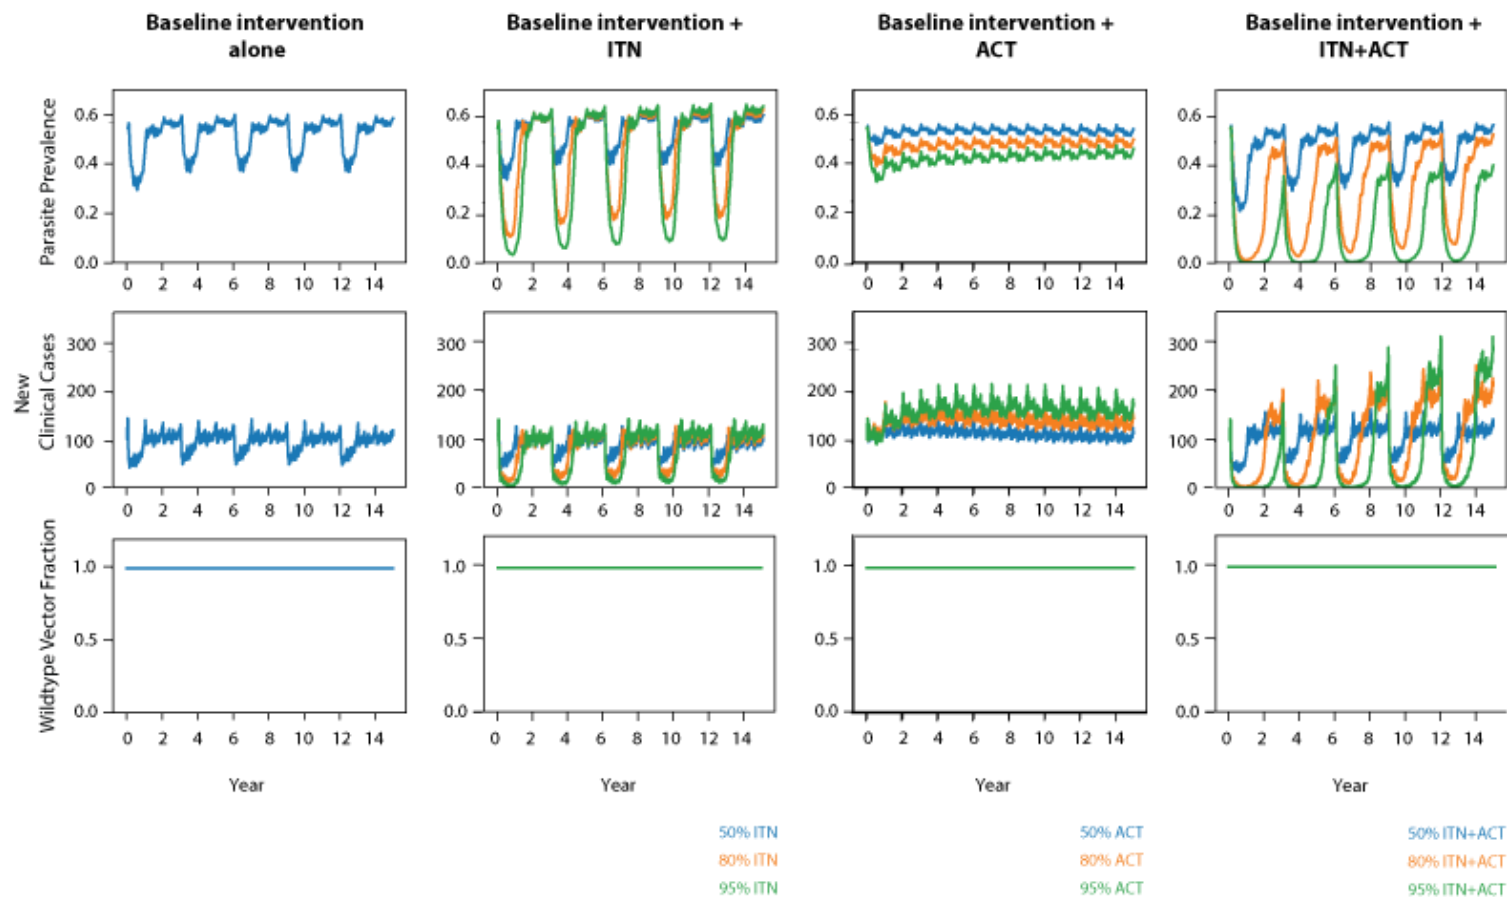

Supplementary: Modeling impact and cost-effectiveness of gene drives for malaria elimination in the Democratic Republic of the Congo

Equateur - scenarios with 300 gene drives at year 0

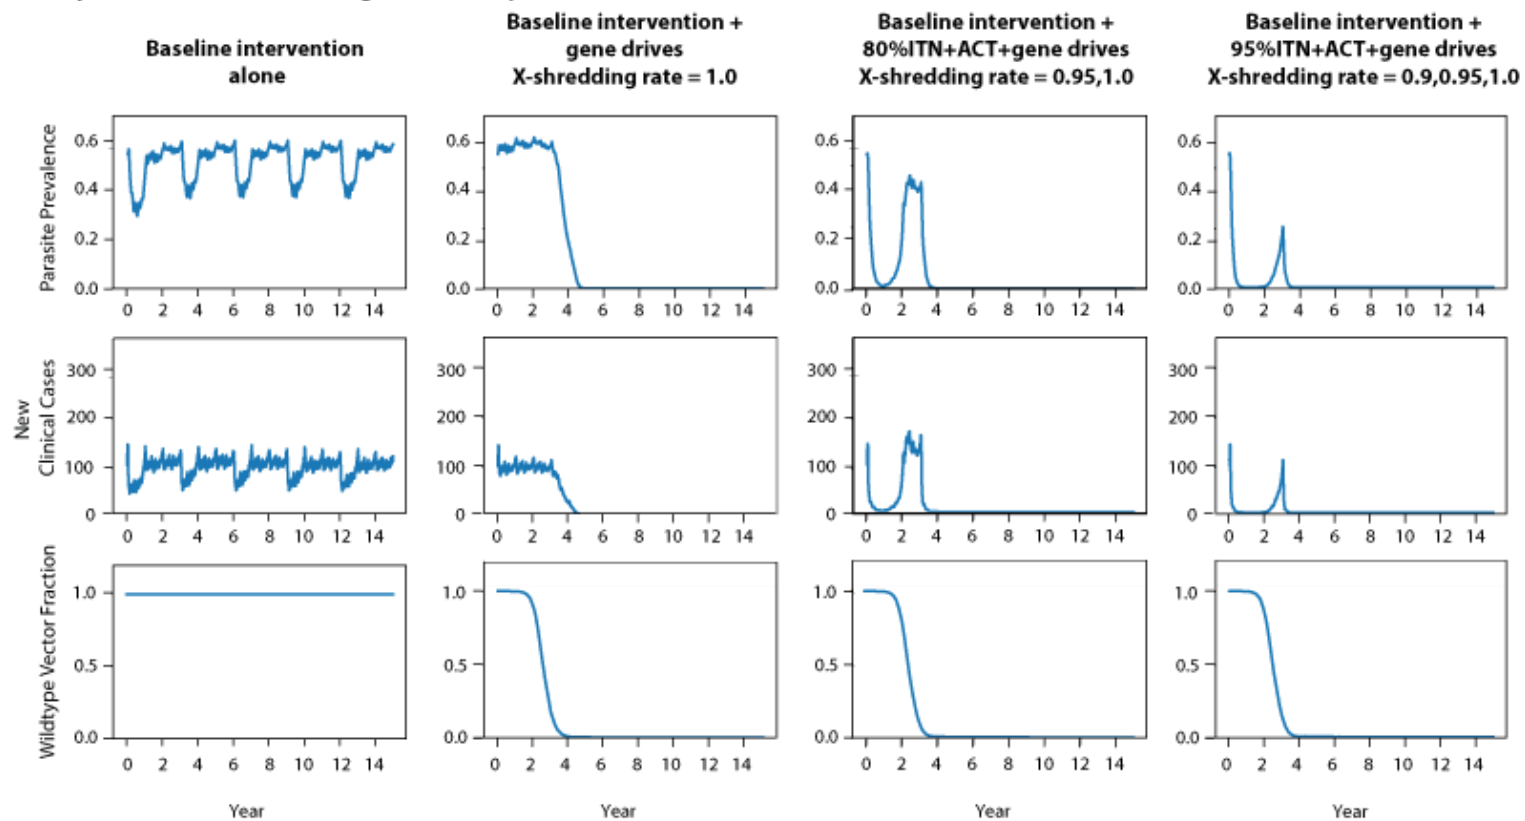

Haut Katanga - scenarios without gene drives

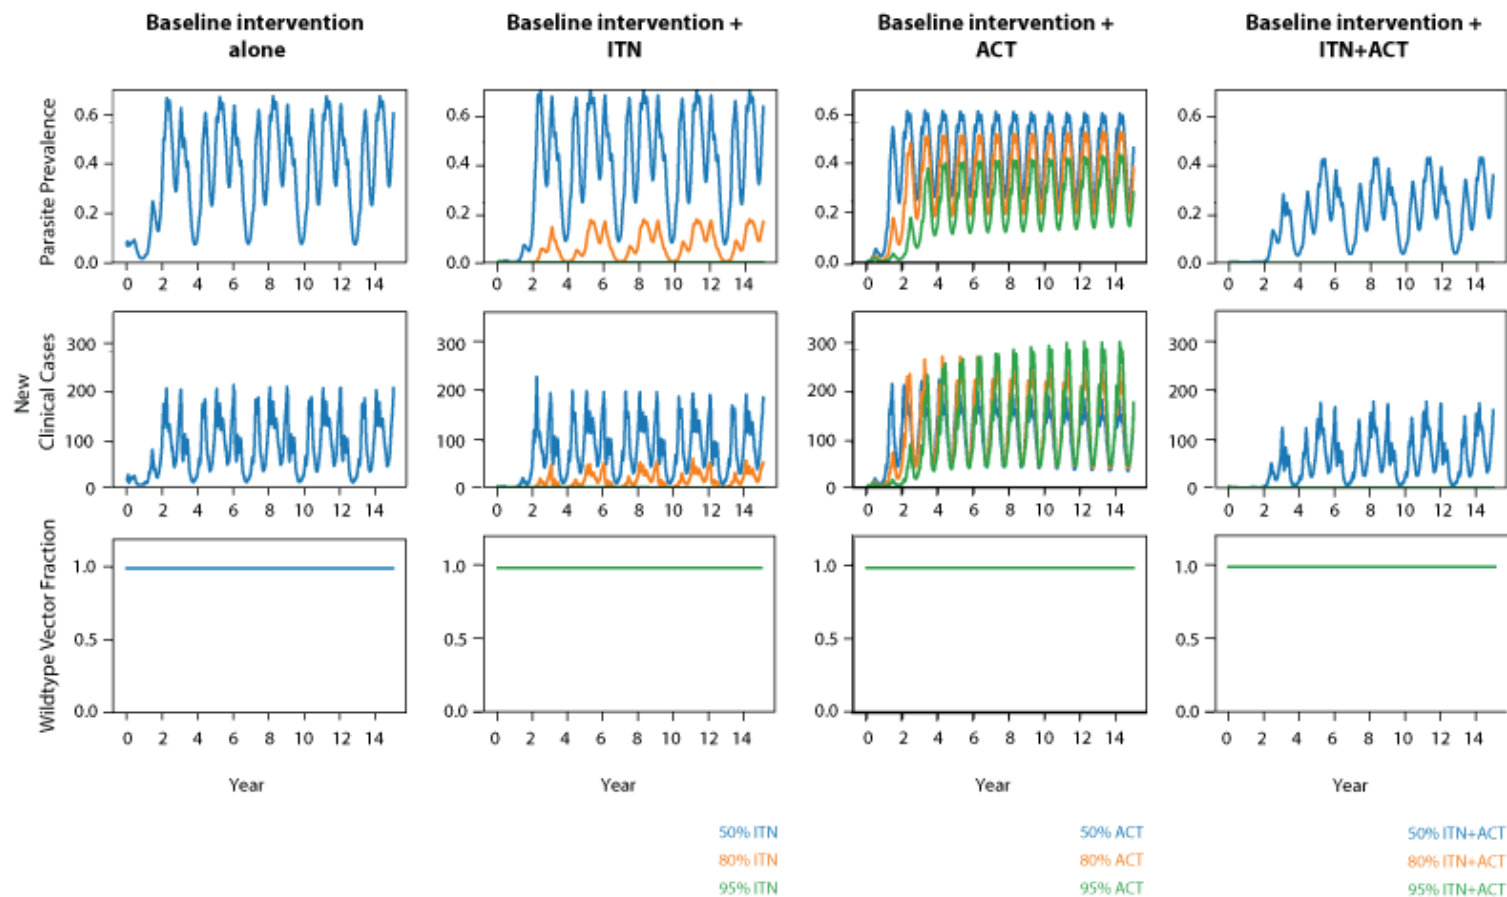

Haut Katanga - scenarios with 300 gene drives released at year 0

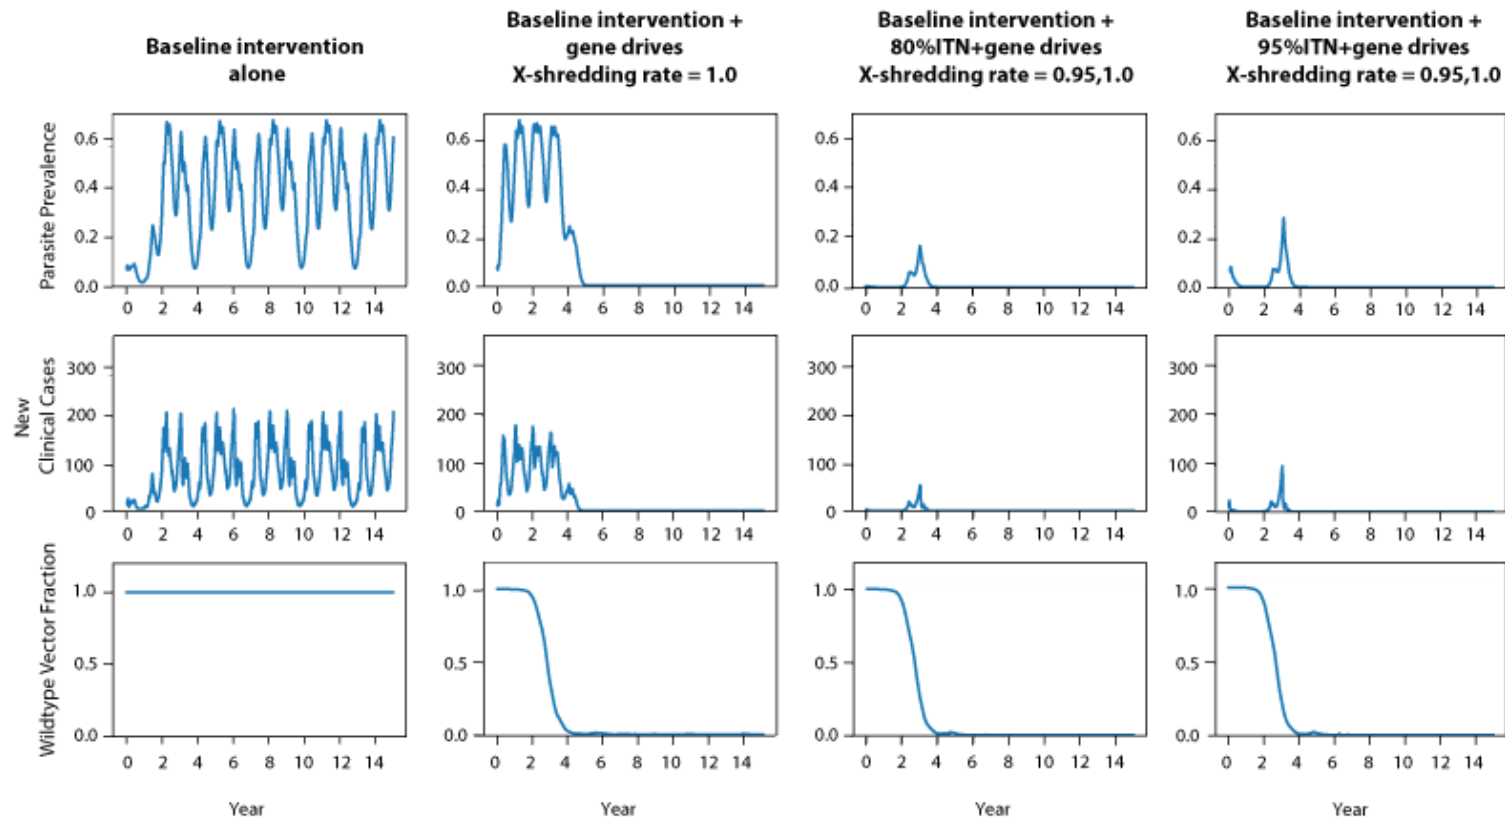

Haut Katanga - scenarios with 300 gene drives released at year 0

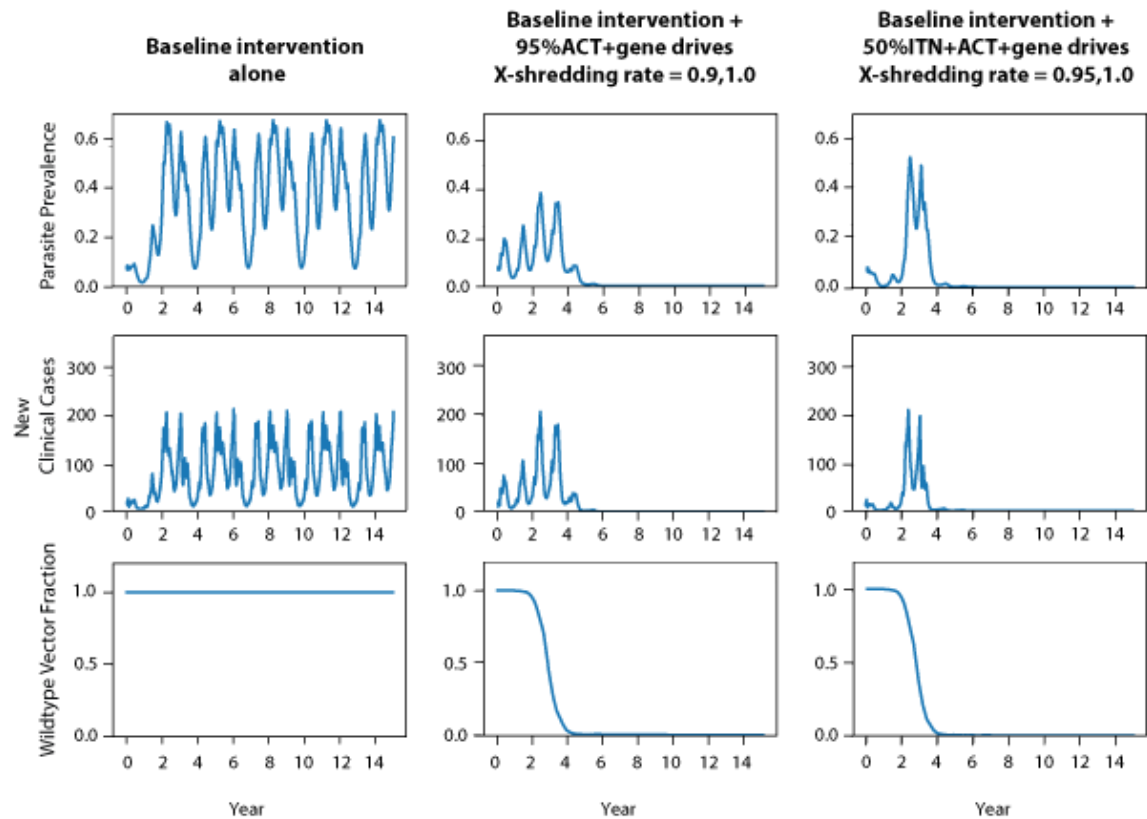



Kasai Central - scenarios without gene drives

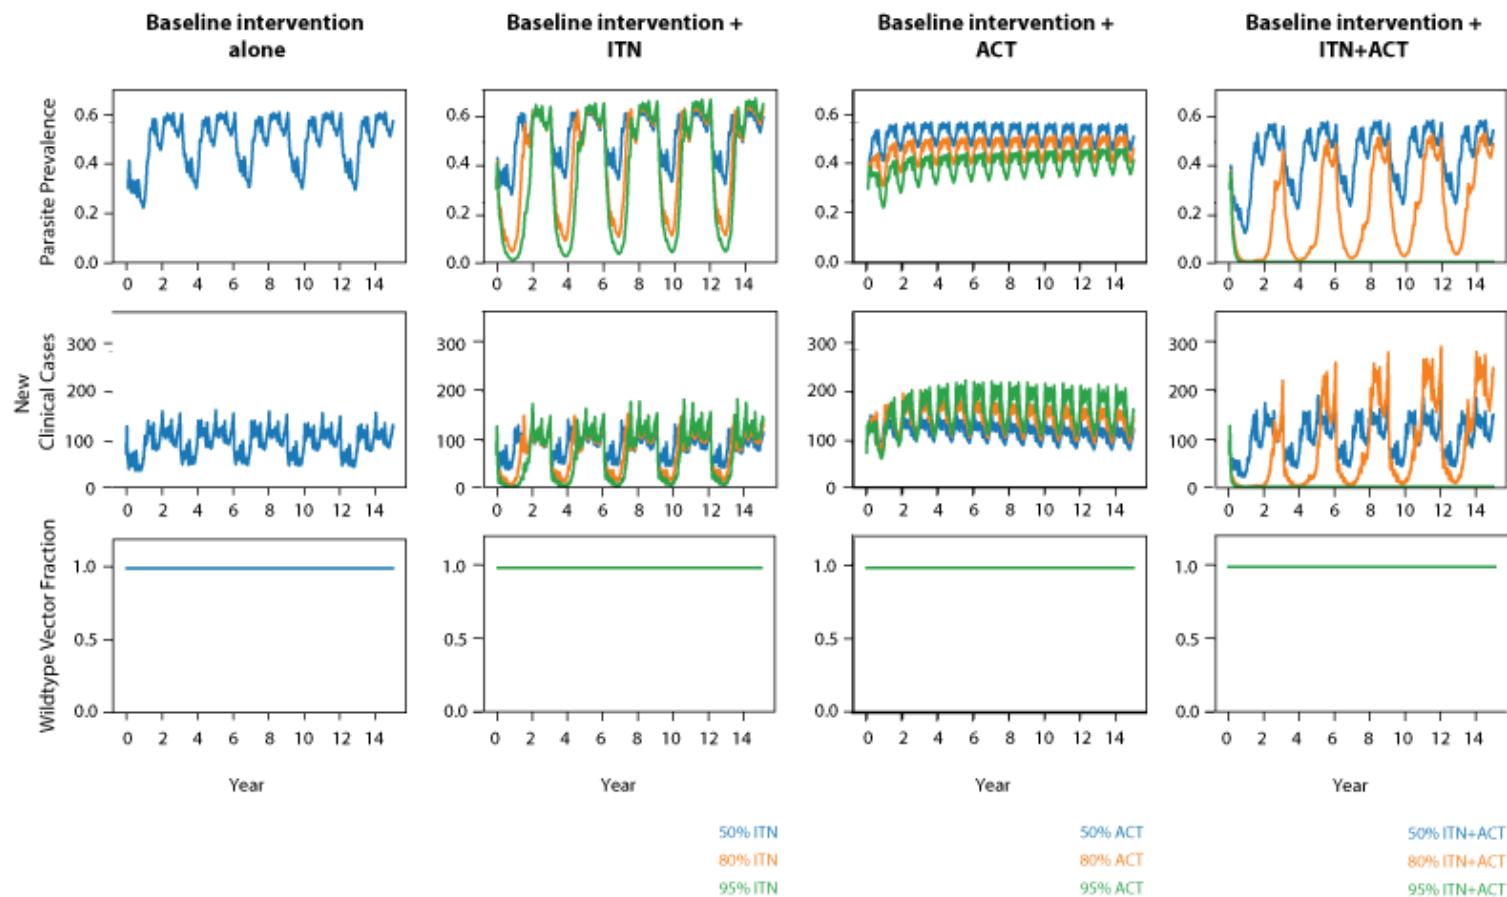

Supplementary: Modeling impact and cost-effectiveness of gene drives for malaria elimination in the Democratic Republic of the Congo

Kasai Central - scenarios with 300 gene drives released at year 0

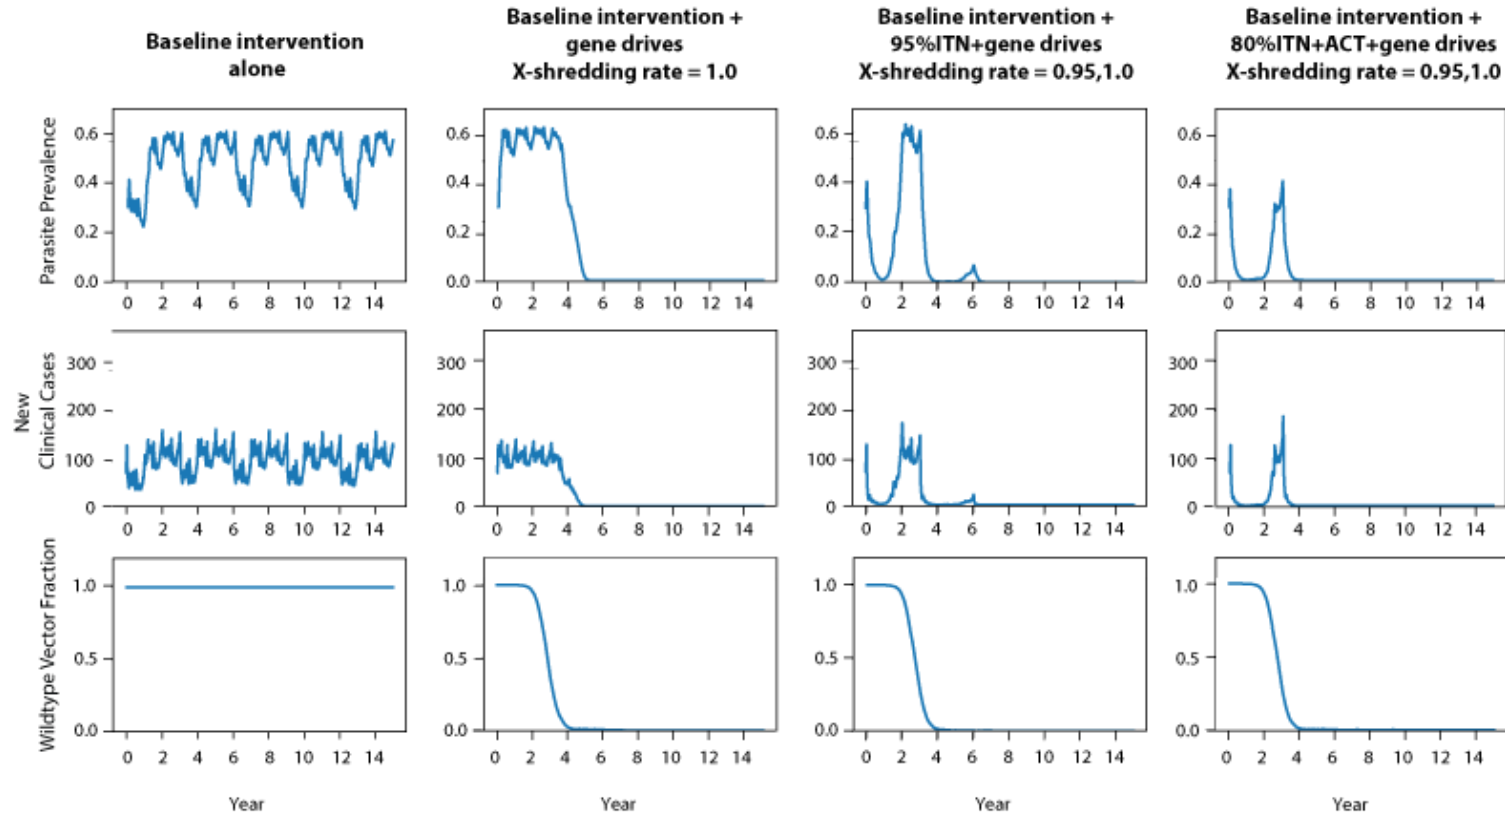

Supplementary: Modeling impact and cost-effectiveness of gene drives for malaria elimination in the Democratic Republic of the Congo

Kinshasa - scenarios without gene drives

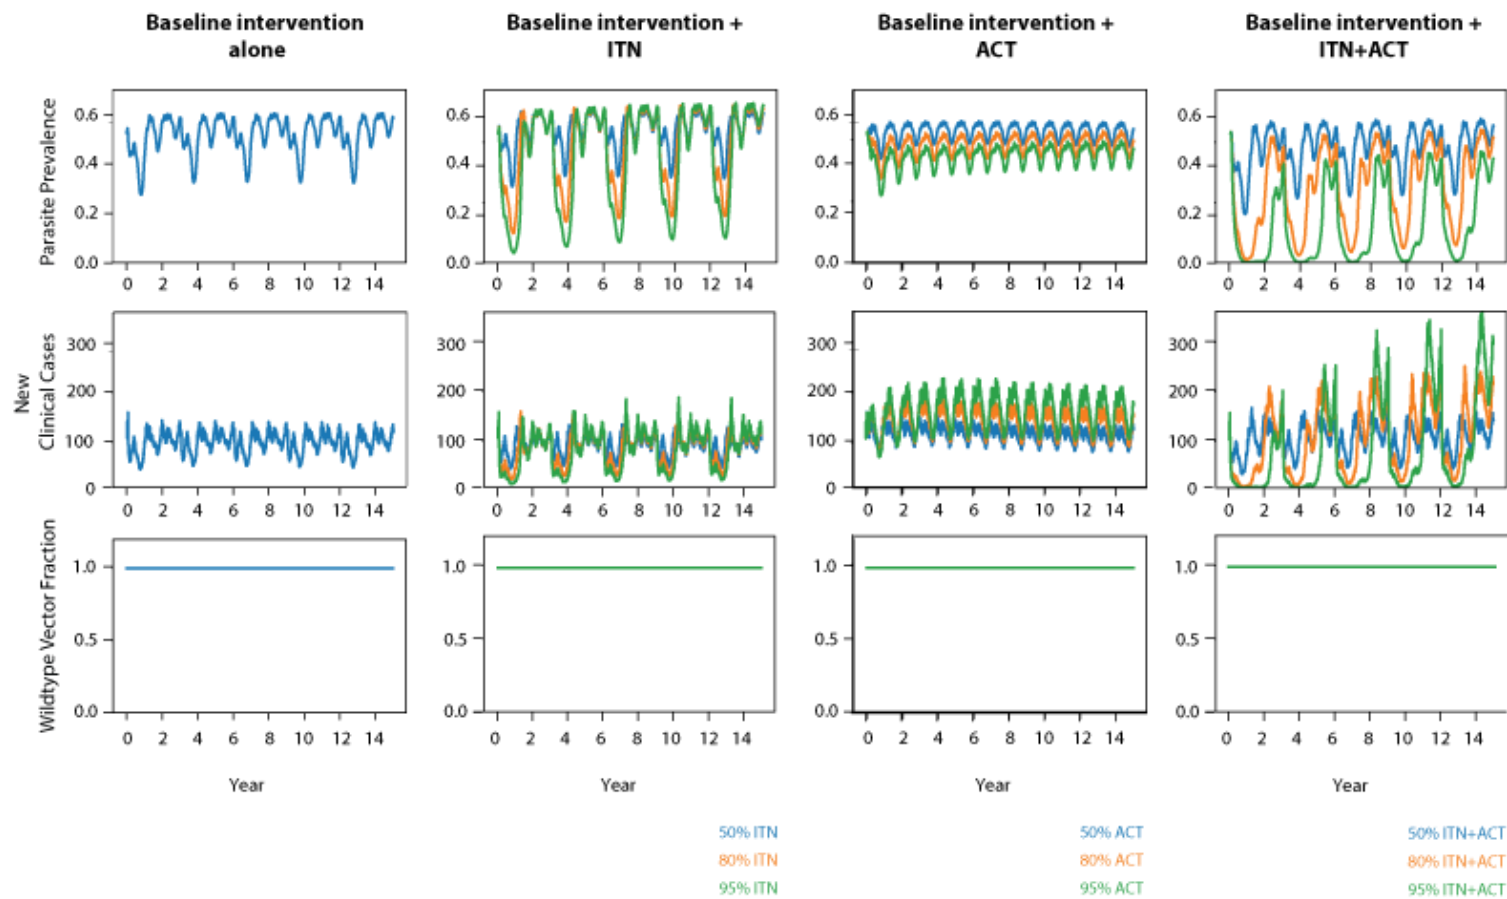

Kinshasa - scenarios with 300 gene drives released at year 0

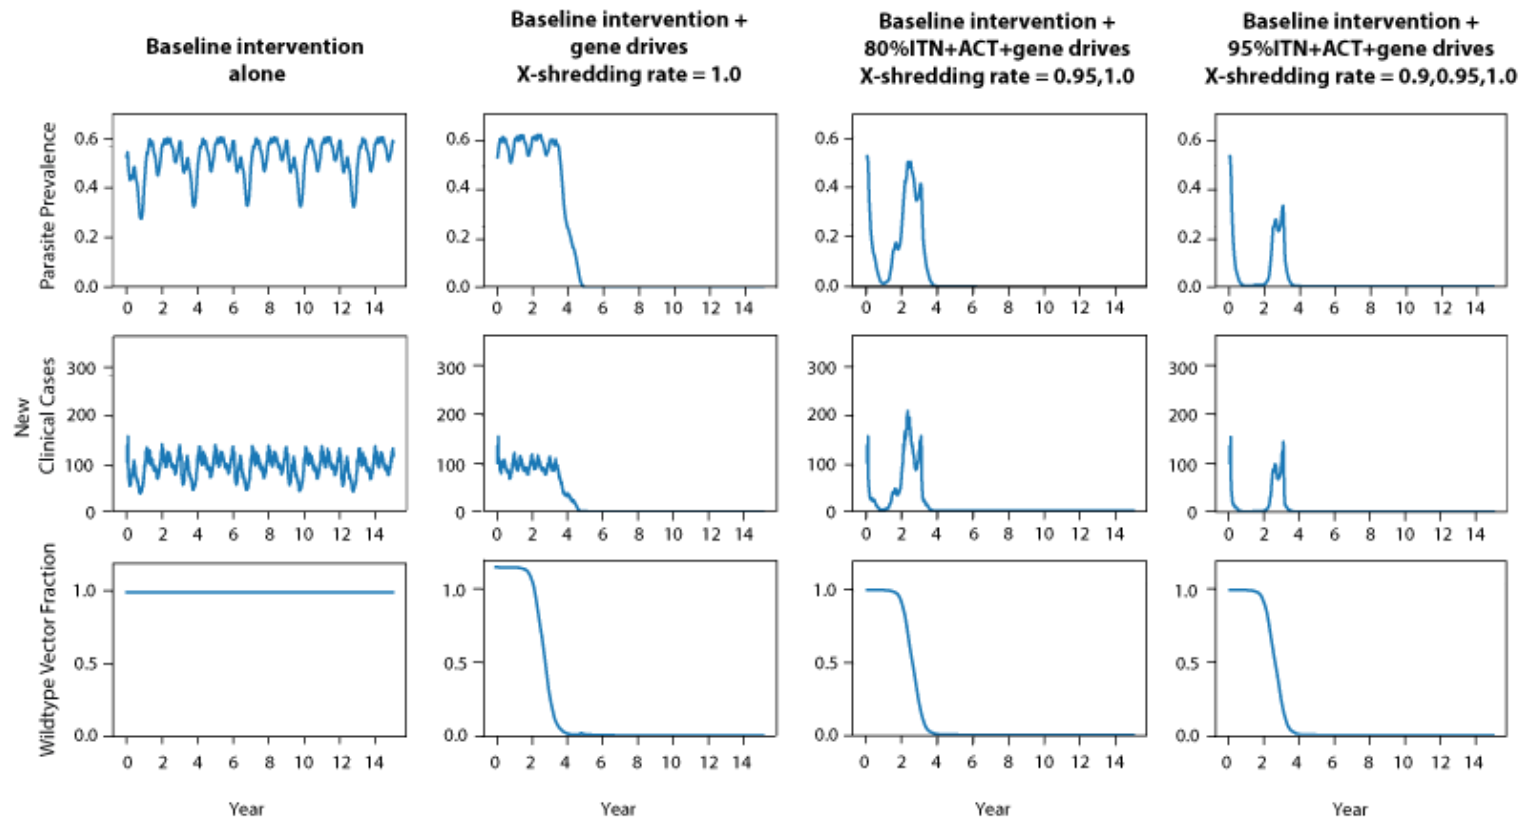

Supplementary: Modeling impact and cost-effectiveness of gene drives for malaria elimination in the Democratic Republic of the Congo

Kwango - scenarios without gene drives

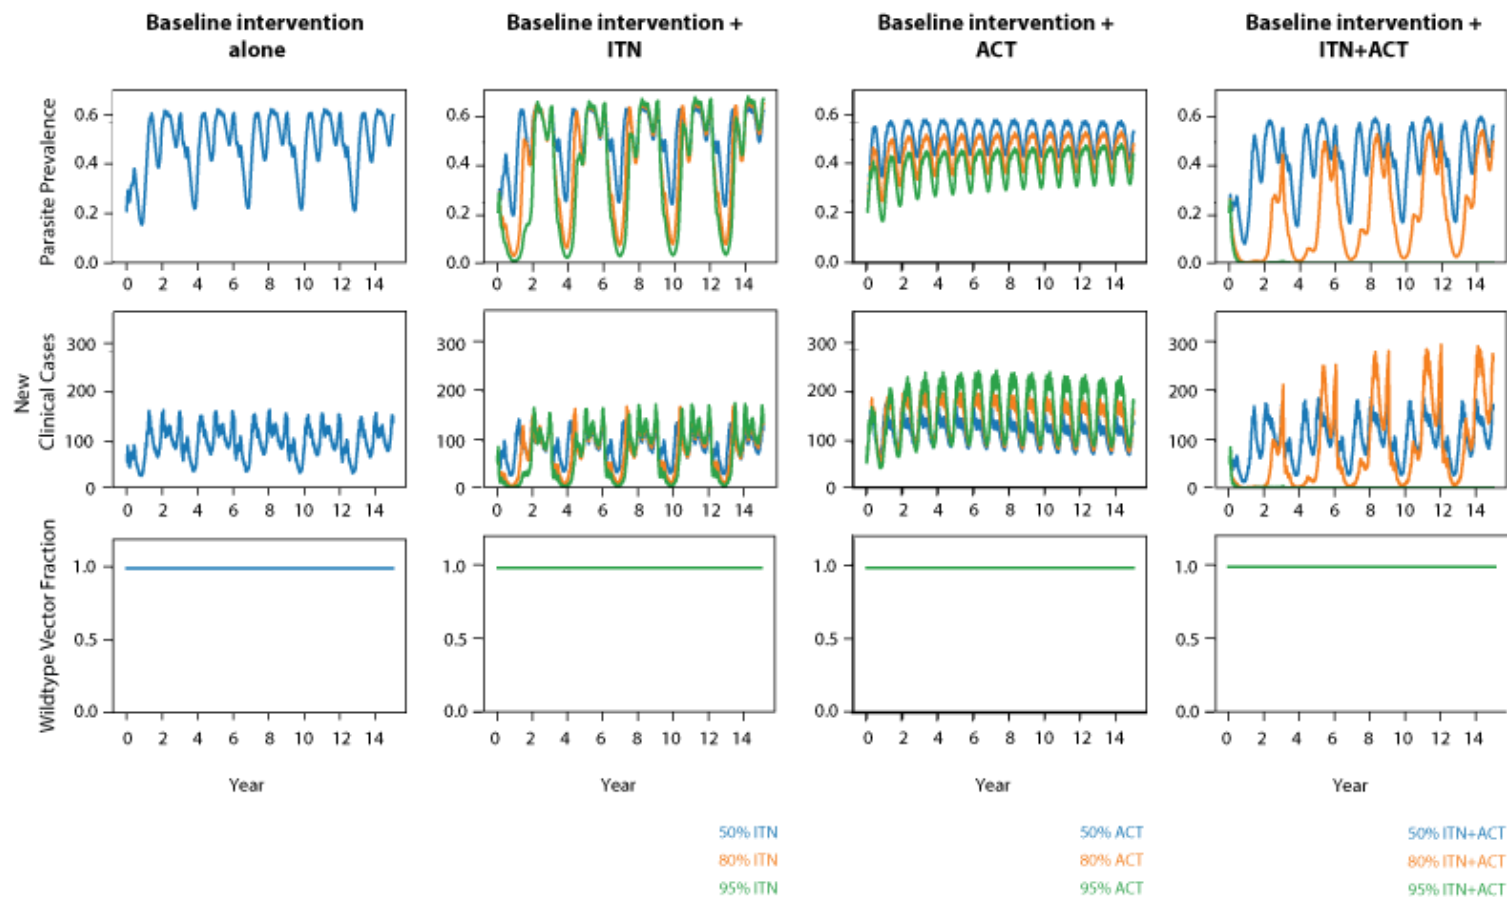

Supplementary: Modeling impact and cost-effectiveness of gene drives for malaria elimination in the Democratic Republic of the Congo

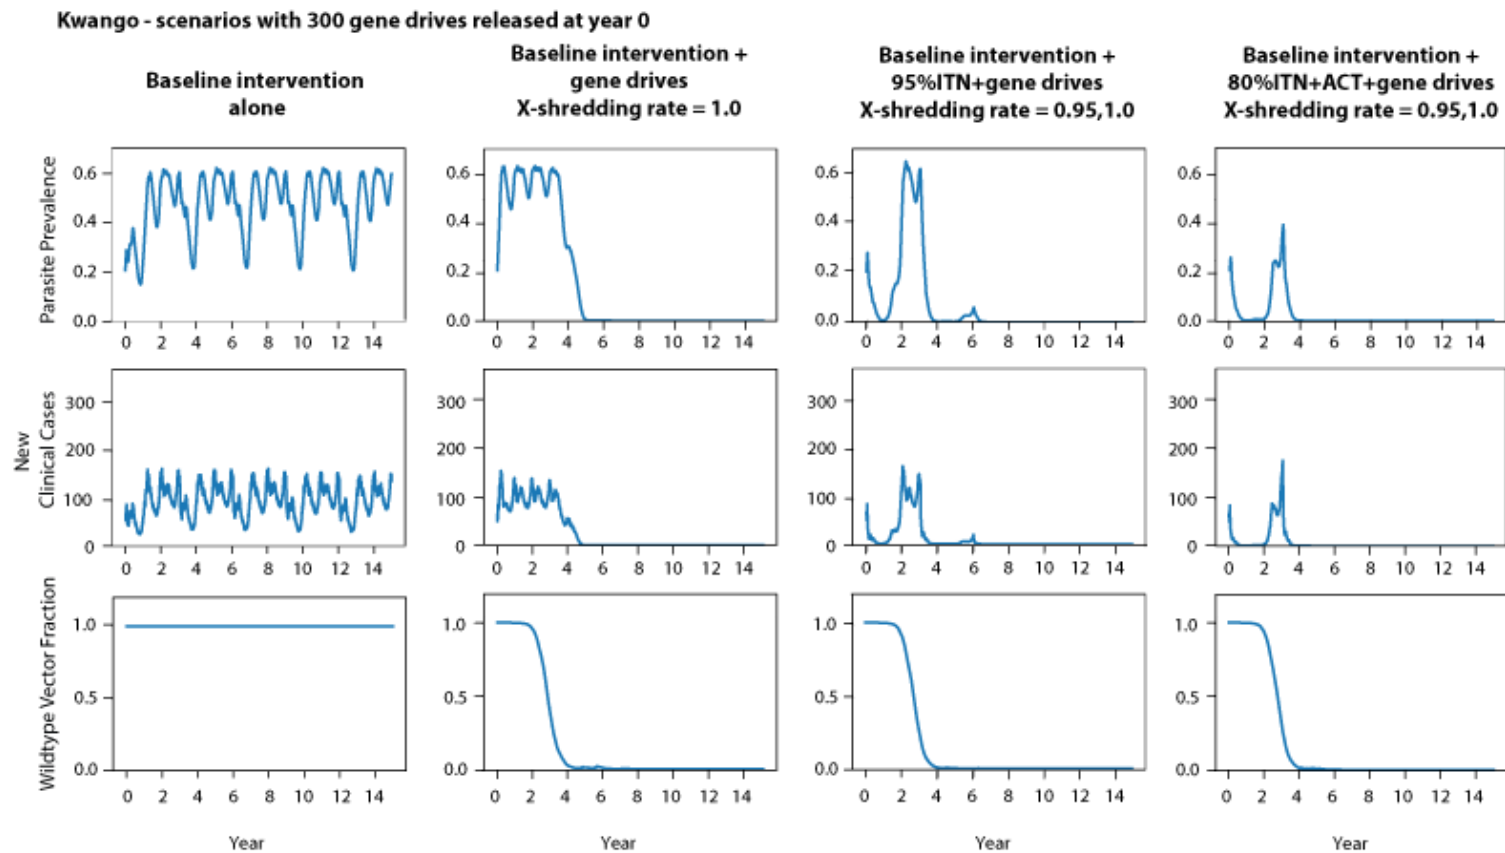

Nord Ubangui - scenarios without gene drives

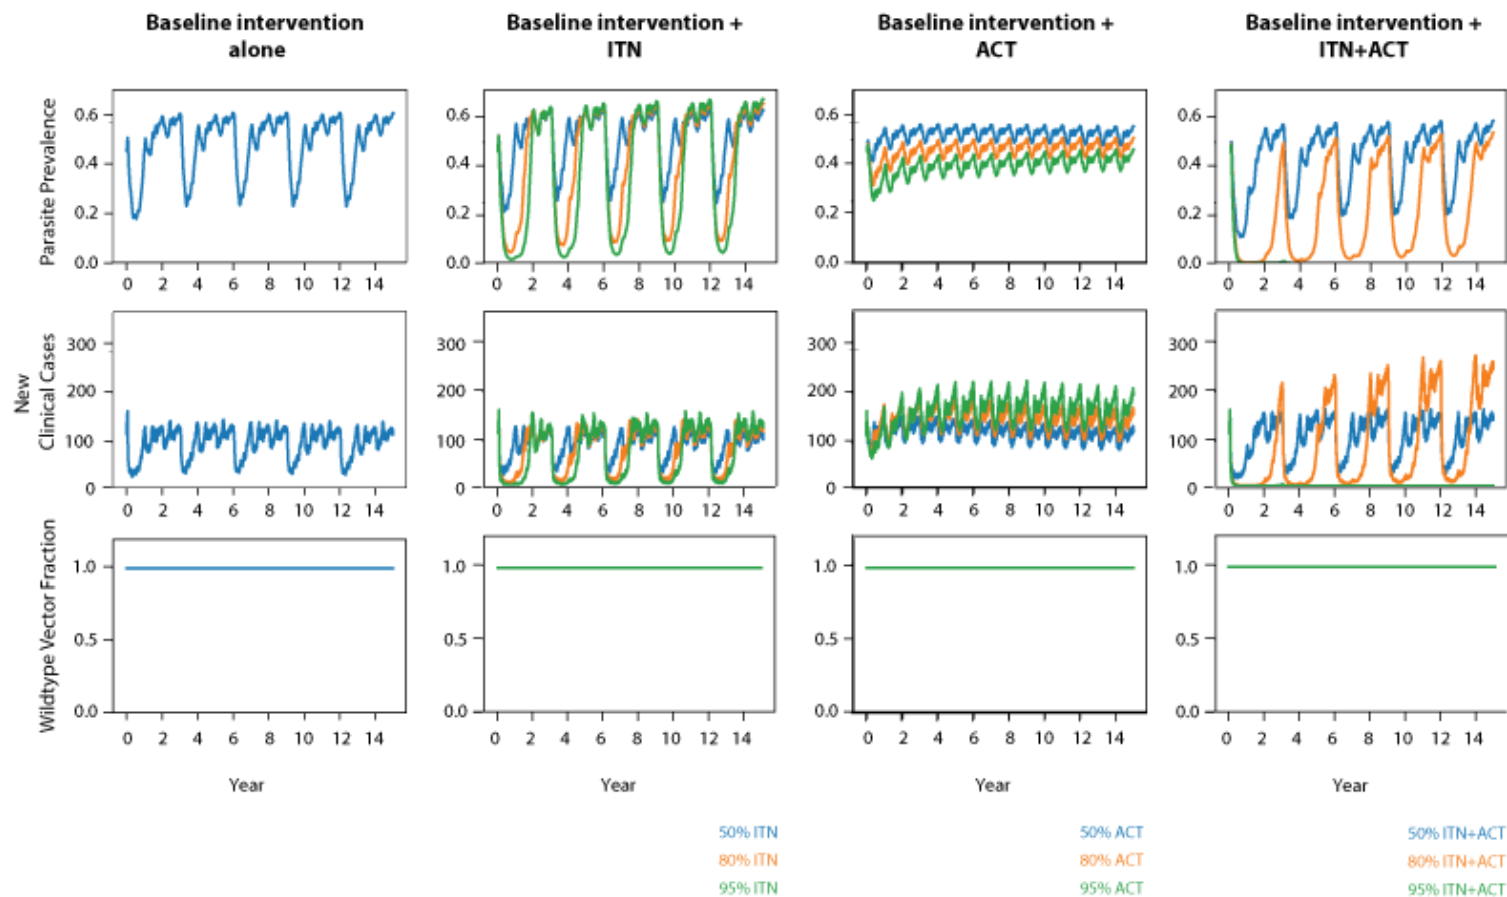

Supplementary: Modeling impact and cost-effectiveness of gene drives for malaria elimination in the Democratic Republic of the Congo

Nord Ubangui - scenarios with 300 gene drives released at year 0

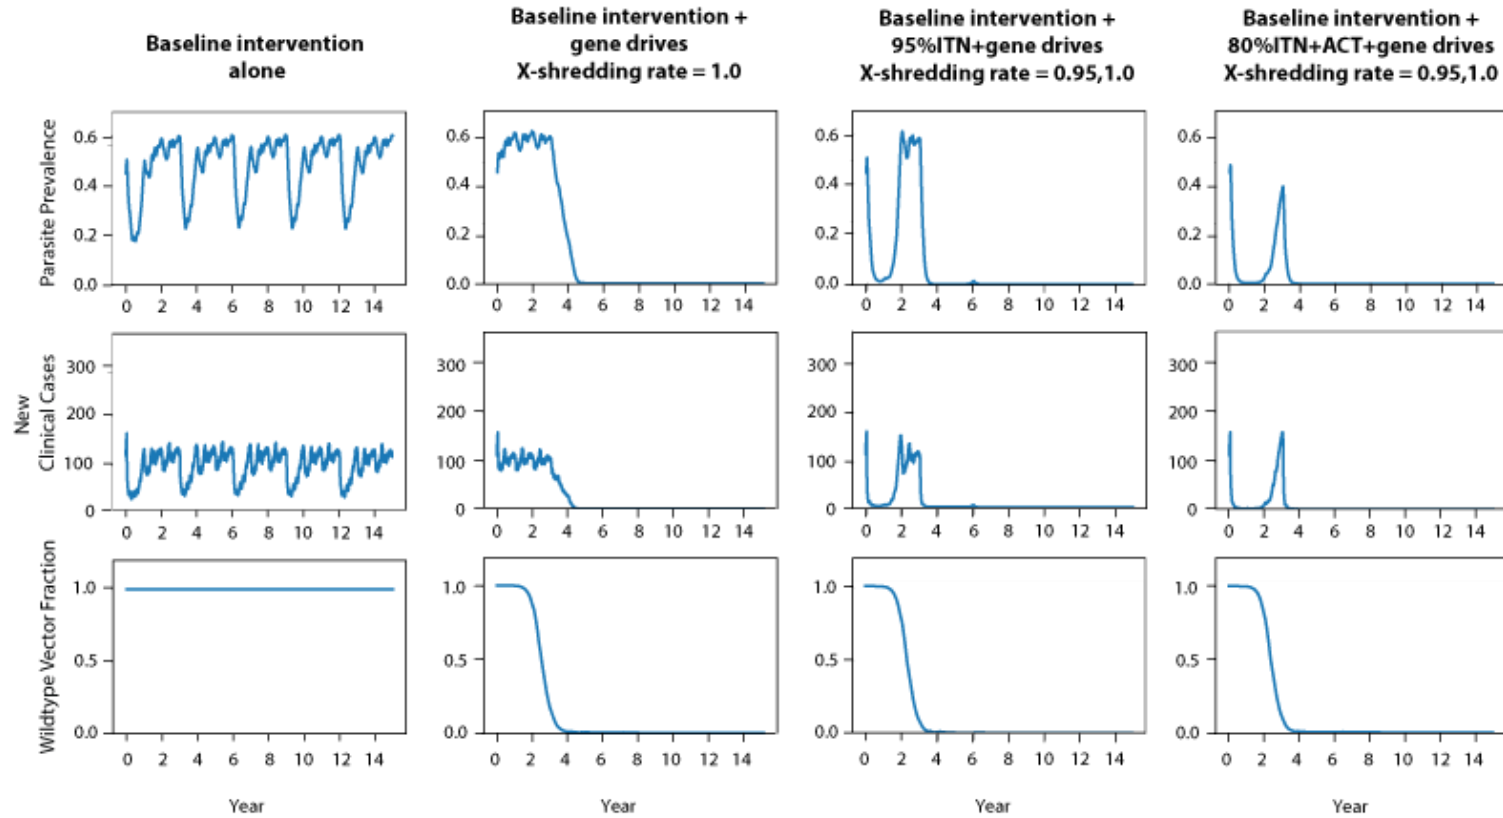



43 **Supplementary 5: Reduced migration testing**

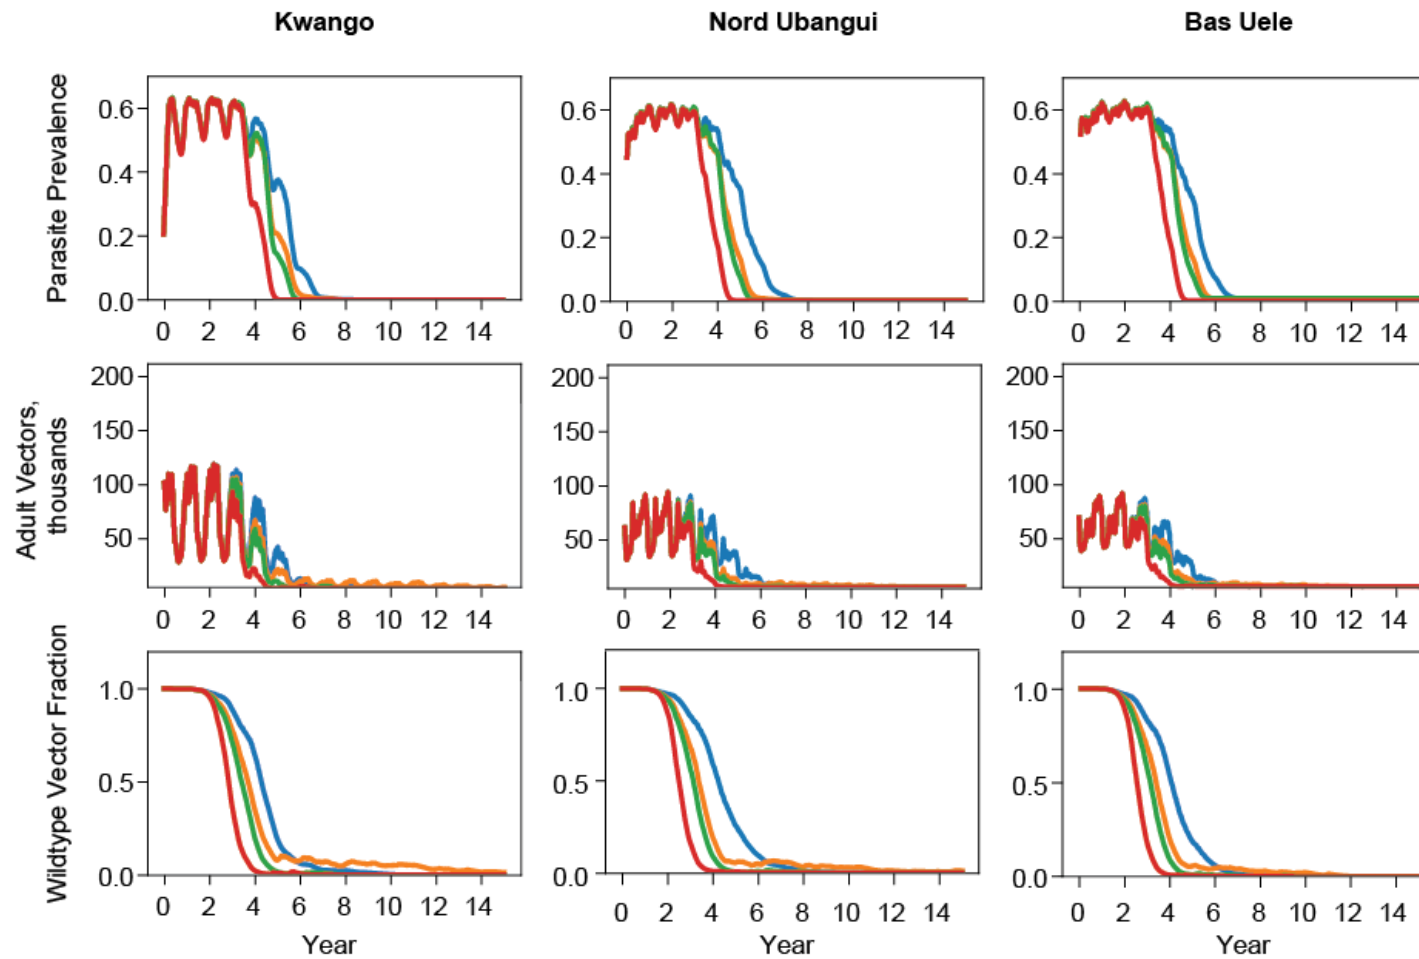

300 gene drives alone, X-shredding rate 1.0  
Vector migration multiplier = 0.01  
Vector migration multiplier = 0.001  
Vector migration multiplier = 0.0001

44

Supplementary: Modeling impact and cost-effectiveness of gene drives for malaria elimination in the Democratic Republic of the Congo

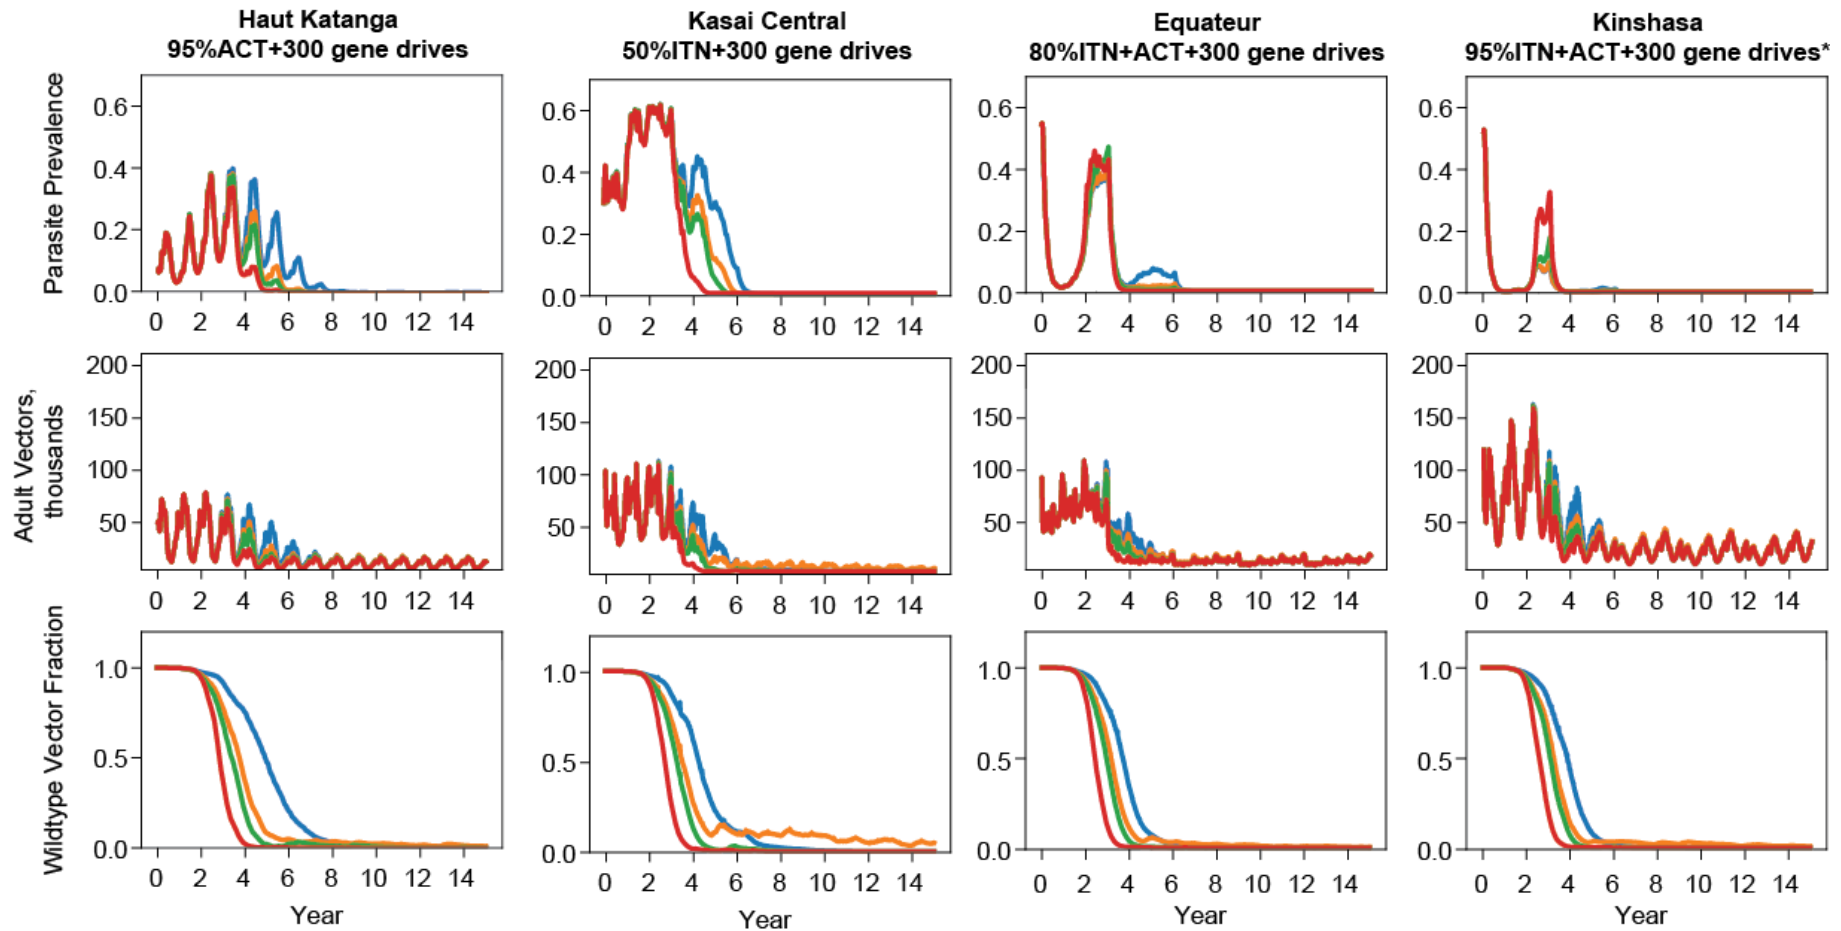

46 **Supplementary 6: Cost-effectiveness analysis**

47  
48 **Table S1** Average DALYs averted per year per one million population across all locations estimated from  
49 model's outputs in spatial simulation framework. Estimates of each scenario were compared with baseline  
50 scenario, which 50% ITNs and 19% ACT coverage were applied. For scenarios that included gene drives,  
51 only the estimates from scenarios that resulted in malaria elimination were included.

|                               |                                                                        | Average DALYs averted per year per one million population |                       |                              |                                |                               |
|-------------------------------|------------------------------------------------------------------------|-----------------------------------------------------------|-----------------------|------------------------------|--------------------------------|-------------------------------|
|                               |                                                                        | Model's estimates                                         |                       |                              |                                |                               |
|                               | Intervention                                                           | Coverage                                                  | Average over 15 years | The first interval: year 1-5 | The second interval: year 6-10 | The last interval: year 11-15 |
| Scenarios without gene drives | ITNs                                                                   | 50%                                                       | -3,696                | -6,818                       | -2,361                         | -1,910                        |
|                               |                                                                        | 80%                                                       | 1,482                 | 12,827                       | -1,990                         | -6,390                        |
|                               |                                                                        | 95%                                                       | 8,727                 | 27,165                       | 2,158                          | -3,143                        |
|                               | ACT                                                                    | 50%                                                       | 1,680                 | -7,733                       | 2,506                          | 10,266                        |
|                               |                                                                        | 80%                                                       | 12,962                | 10,390                       | 10,212                         | 18,283                        |
|                               |                                                                        | 95%                                                       | 21,437                | 25,261                       | 15,883                         | 23,169                        |
|                               | ITNs & ACT                                                             | 50%                                                       | 8,004                 | 14,973                       | 4,432                          | 4,606                         |
|                               |                                                                        | 80%                                                       | 33,477                | 60,693                       | 21,288                         | 18,451                        |
|                               |                                                                        | 95%                                                       | 72,706                | 81,875                       | 69,014                         | 67,230                        |
| Scenarios with gene drives    | 300 gene drive mosquitoes with X-shredding rates = 1.0 alone           | NA                                                        | 57,298                | 2,888                        | 82,542                         | 86,464                        |
|                               | ITNs plus gene drives with X-shredding rates = 0.95 and 1.0            | 80                                                        | 57,561                | 12,201                       | 81,580                         | 78,904                        |
|                               | ITNs plus gene drives with X-shredding rates = 0.95 and 1.0            | 95                                                        | 68,222                | 43,505                       | 75,420                         | 85,741                        |
|                               | ACT plus gene drives with X-shredding rates = 0.95 and 1.0             | 95                                                        | 68,006                | 40,162                       | 83,090                         | 80,766                        |
|                               | ITNs & ACT plus gene drives with X-shredding rates = 0.95 and 1.0      | 50                                                        | 67,740                | 39,311                       | 83,142                         | 80,766                        |
|                               | ITNs & ACT plus gene drives with X-shredding rates = 0.95 and 1.0      | 80                                                        | 81,029                | 73,234                       | 82,414                         | 87,441                        |
|                               | ITNs & ACT plus gene drives with X-shredding rates = 0.9, 0.95 and 1.0 | 95                                                        | 85,307                | 86,609                       | 81,819                         | 87,492                        |

- 52 **Notes for Table S1:**
- 53 1) NA: Not applicable
- 54 2) Green highlight: the scenario achieved malaria elimination
- 55 3) It is possible that the DALY averted results turned out to be negative figures in some
- 56 scenarios since the combination of ITNs at 50% coverage and ACT at 19% coverage was
- 57 applied in the baseline scenarios that were used as a comparator to reflect reality. For
- 58 example, a 50%ITNs scenario means only ITNs at 50% coverage was applied as a single
- 59 intervention in the scenario. Therefore, it is understandable that the lower efficacy of
- 60 50%ITNs alone could be observed once compared to the comparator in which the combination
- 61 of 50%ITNs and 19%ACT was applied.
- 62 Negative DALYs averted are in red texts.
- 4) WHO estimated the DALYs averted using null (do nothing) scenario as a comparator.

Supplementary: Modeling impact and cost-effectiveness of gene drives for malaria elimination in the Democratic Republic of the Congo

63 Table S2 Average cost per DALY averted of interventions and combinations applied estimated from model's outputs.

|                                                          |              |              | Scenarios without gene drives |             |        |     |     |     |                                 |     |    | Scenarios with gene drives                                   |    |    |                                                             |    |                                                             |    |                                                            |    |                                                                   |    |                                                                        |  |
|----------------------------------------------------------|--------------|--------------|-------------------------------|-------------|--------|-----|-----|-----|---------------------------------|-----|----|--------------------------------------------------------------|----|----|-------------------------------------------------------------|----|-------------------------------------------------------------|----|------------------------------------------------------------|----|-------------------------------------------------------------------|----|------------------------------------------------------------------------|--|
|                                                          |              |              | Intervention(s)               |             |        |     |     |     |                                 |     |    |                                                              |    |    | Coverage (%)                                                |    |                                                             |    |                                                            |    |                                                                   |    |                                                                        |  |
|                                                          |              |              | ITNs                          |             |        | ACT |     |     | The combination of ITNs and ACT |     |    | 300 gene-drive mosquitoes with X-shredding rates = 1.0 alone |    |    | ITNs plus gene drives with X-shredding rates = 0.95 and 1.0 |    | ITNs plus gene drives with X-shredding rates = 0.95 and 1.0 |    | ACT plus gene drives with X-shredding rates = 0.95 and 1.0 |    | ITNs & ACT plus gene drives with X-shredding rates = 0.95 and 1.0 |    | ITNs & ACT plus gene drives with X-shredding rates = 0.9, 0.95 and 1.0 |  |
| Parasite prevalence at the end of the 50-year run-in (%) | Coverage (%) | Interval     | 50                            | 80          | 95     | 50  | 80  | 95  | 50                              | 80  | 95 | Bound                                                        | NA | 80 | 95                                                          | 95 | 50                                                          | 80 | 95                                                         |    |                                                                   |    |                                                                        |  |
|                                                          |              |              | WHO's estimates for Afr E (4) |             |        | 49  | 42  | 41  | 21                              | 14  | 12 | 43                                                           | 35 | 28 | NA                                                          | NA | NA                                                          | NA | NA                                                         | NA | NA                                                                | NA |                                                                        |  |
| Estimates from model's outputs                           | 7.27         | Haut Katanga | Year 1-5                      | Lower bound | -36    | 111 | 37  | 23  | 36                              | NA  | NA | NA                                                           | NA | NA | NA                                                          | NA | NA                                                          | NA | NA                                                         |    |                                                                   |    |                                                                        |  |
|                                                          |              |              |                               | Upper bound | -355   | 641 | 205 | 184 | 200                             | NA  | NA | NA                                                           | NA | NA | NA                                                          | NA | NA                                                          | NA | NA                                                         | NA |                                                                   |    |                                                                        |  |
|                                                          |              |              | Year 6-10                     | Lower bound | 9      | 17  | 26  | 11  | 17                              | NA  | NA | NA                                                           | NA | NA | NA                                                          | NA | NA                                                          | NA | NA                                                         | NA | NA                                                                |    |                                                                        |  |
|                                                          |              |              |                               | Upper bound | 96     | 142 | 89  | 95  | 96                              | NA  | NA | NA                                                           | NA | NA | NA                                                          | NA | NA                                                          | NA | NA                                                         | NA | NA                                                                |    |                                                                        |  |
|                                                          |              |              | Year 11-15                    | Lower bound | 9      | 17  | 18  | 12  | 17                              | NA  | NA | NA                                                           | NA | NA | NA                                                          | NA | NA                                                          | NA | NA                                                         | NA | NA                                                                |    |                                                                        |  |
|                                                          |              |              |                               | Upper bound | 99     | 98  | 91  | 97  | 99                              | NA  | NA | NA                                                           | NA | NA | NA                                                          | NA | NA                                                          | NA | NA                                                         | NA | NA                                                                |    |                                                                        |  |
|                                                          | 20.81        | Kwango       | Year 1-5                      | Lower bound | -340   | NA  | 32  | NA  | NA                              | 20  | NA | NA                                                           | NA | NA | NA                                                          | NA | NA                                                          | NA | NA                                                         | NA |                                                                   |    |                                                                        |  |
|                                                          |              |              |                               | Upper bound | -3,382 | NA  | 175 | NA  | NA                              | 101 | NA | NA                                                           | NA | NA | NA                                                          | NA | NA                                                          | NA | NA                                                         | NA | NA                                                                |    |                                                                        |  |

Supplementary: Modeling impact and cost-effectiveness of gene drives for malaria elimination in the Democratic Republic of the Congo

|       |               |                   |          |      |      |     |    |    |     |     |    |                    |         |    |     |    |    |     |    |
|-------|---------------|-------------------|----------|------|------|-----|----|----|-----|-----|----|--------------------|---------|----|-----|----|----|-----|----|
|       |               | <b>Year 6-10</b>  | -<br>427 | -494 | -156 | 55  | 17 | 12 | 112 | 59  | 9  | <b>Lower bound</b> | 9       | NA | 17  | NA | NA | 18  | NA |
|       |               |                   |          |      |      |     |    |    |     |     |    | <b>Upper bound</b> | 85      | NA | 95  | NA | NA | 94  | NA |
|       |               | <b>Year 11-15</b> | -<br>275 | -117 | -106 | 18  | 11 | 9  | 120 | 89  | 8  | <b>Lower bound</b> | 8       | NA | 16  | NA | NA | 18  | NA |
|       |               |                   |          |      |      |     |    |    |     |     |    | <b>Upper bound</b> | 82      | NA | 90  | NA | NA | 91  | NA |
| 29.65 | Kasai Central | <b>Year 1-5</b>   | -69      | 51   | 26   | -29 | 11 | 8  | 46  | 11  | 8  | <b>Lower bound</b> | 11,661  | NA | 32  | NA | NA | 20  | NA |
|       |               |                   |          |      |      |     |    |    |     |     |    | <b>Upper bound</b> | 116,124 | NA | 176 | NA | NA | 103 | NA |
|       |               | <b>Year 6-10</b>  | -175     | -245 | -161 | 64  | 20 | 14 | 157 | 68  | 9  | <b>Lower bound</b> | 9       | NA | 18  | NA | NA | 19  | NA |
|       |               |                   |          |      |      |     |    |    |     |     |    | <b>Upper bound</b> | 87      | NA | 97  | NA | NA | 97  | NA |
|       |               | <b>Year 11-15</b> | -220     | -102 | -81  | 20  | 11 | 9  | 142 | 121 | 9  | <b>Lower bound</b> | 8       | NA | 16  | NA | NA | 18  | NA |
|       |               |                   |          |      |      |     |    |    |     |     |    | <b>Upper bound</b> | 83      | NA | 91  | NA | NA | 92  | NA |
| 45.03 | Nord Ubangui  | <b>Year 1-5</b>   | -64      | 53   | 30   | -27 | 20 | 8  | 48  | 11  | 8  | <b>Lower bound</b> | 82      | NA | 31  | NA | NA | 20  | NA |
|       |               |                   |          |      |      |     |    |    |     |     |    | <b>Upper bound</b> | 816     | NA | 172 | NA | NA | 102 | NA |
|       |               | <b>Year 6-10</b>  | -168     | -925 | -206 | 125 | 22 | 15 | 138 | 66  | 9  | <b>Lower bound</b> | 9       | NA | 17  | NA | NA | 19  | NA |
|       |               |                   |          |      |      |     |    |    |     |     |    | <b>Upper bound</b> | 88      | NA | 96  | NA | NA | 98  | NA |
|       |               | <b>Year 11-15</b> | -419     | -96  | -82  | 17  | 10 | 9  | 129 | 98  | 8  | <b>Lower bound</b> | 8       | NA | 16  | NA | NA | 17  | NA |
|       |               |                   |          |      |      |     |    |    |     |     |    | <b>Upper bound</b> | 82      | NA | 89  | NA | NA | 91  | NA |
| 51.64 | Bas Uele      | <b>Year 0-5</b>   | -81      | 61   | 29   | -36 | 19 | 8  | 48  | 12  | 10 | <b>Lower bound</b> | 65      | NA | NA  | NA | NA | 20  | 16 |
|       |               |                   |          |      |      |     |    |    |     |     |    | <b>Upper bound</b> | 645     | NA | NA  | NA | NA | 105 | 87 |
|       |               | <b>Year 6-10</b>  | -181     | -606 | -322 | 117 | 22 | 15 | 140 | 170 | 9  | <b>Lower bound</b> | 9       | NA | NA  | NA | NA | 19  | 18 |

Supplementary: Modeling impact and cost-effectiveness of gene drives for malaria elimination in the Democratic Republic of the Congo

|       |          |            |      |       |        |     |    |    |     |     |    |             |             |    |    |    |    |     |    |    |
|-------|----------|------------|------|-------|--------|-----|----|----|-----|-----|----|-------------|-------------|----|----|----|----|-----|----|----|
|       |          |            |      |       |        |     |    |    |     |     |    |             | Upper bound | 87 | NA | NA | NA | NA  | 97 | 96 |
|       |          | Year 11-15 | -204 | -81   | -73    | 19  | 11 | 9  | 180 | 111 | 9  | Lower bound | 8           | NA | NA | NA | NA | 18  | 17 |    |
|       |          |            |      |       |        |     |    |    |     |     |    | Upper bound | 82          | NA | NA | NA | NA | 91  | 90 |    |
| 52.33 | Kinshasa | Year 1-5   | -103 | 104   | 51     | -89 | 19 | 9  | 67  | 17  | 10 | Lower bound | 77          | NA | NA | NA | NA | 25  | 18 |    |
|       |          |            |      |       |        |     |    |    |     |     |    | Upper bound | 765         | NA | NA | NA | NA | 129 | 97 |    |
|       |          | Year 6-10  | -170 | -366  | -1,602 | 110 | 20 | 13 | 181 | 69  | 23 | Lower bound | 9           | NA | NA | NA | NA | 19  | 18 |    |
|       |          |            |      |       |        |     |    |    |     |     |    | Upper bound | 88          | NA | NA | NA | NA | 98  | 97 |    |
|       |          | Year 11-15 | -271 | -118  | -98    | 18  | 10 | 8  | 143 | 82  | 36 | Lower bound | 8           | NA | NA | NA | NA | 17  | 17 |    |
|       |          |            |      |       |        |     |    |    |     |     |    |             | Upper bound | 81 | NA | NA | NA | NA  | 91 | 90 |
| 54.33 | Equateur | Year 1-5   | -104 | 76    | 40     | -86 | 17 | 8  | 53  | 40  | 9  | Lower bound | 55          | NA | NA | NA | NA | 23  | 17 |    |
|       |          |            |      |       |        |     |    |    |     |     |    | Upper bound | 547         | NA | NA | NA | NA | 120 | 91 |    |
|       |          | Year 6-10  | -180 | 5,457 | -706   | 115 | 21 | 13 | 143 | 75  | 19 | Lower bound | 9           | NA | NA | NA | NA | 19  | 18 |    |
|       |          |            |      |       |        |     |    |    |     |     |    | Upper bound | 88          | NA | NA | NA | NA | 98  | 97 |    |
|       |          | Year 11-15 | -252 | -75   | -74    | 20  | 12 | 9  | 164 | 115 | 31 | Lower bound | 8           | NA | NA | NA | NA | 18  | 17 |    |
|       |          |            |      |       |        |     |    |    |     |     |    |             | Upper bound | 83 | NA | NA | NA | NA  | 92 | 91 |

64 Note for Table S2: 1) NA: Not applicable  
 65 2) The scenarios that could achieve malaria elimination when adding gene drives were highlighted in green.  
 66 3) \$int: International Dollars  
 67 4) upper bound: upper bound price, lower bound: lower bound price  
 68

Supplementary: Modeling impact and cost-effectiveness of gene drives for malaria elimination in the Democratic Republic of the Congo

69 Table S3 Incremental cost-effectiveness ratio in year 1-5 after applying intervention(s)

|                               |                                                                        |     |   | ICER<br>(\$int per DALY averted) |             |                                   |             |                                  |             |
|-------------------------------|------------------------------------------------------------------------|-----|---|----------------------------------|-------------|-----------------------------------|-------------|----------------------------------|-------------|
|                               |                                                                        |     |   | The first interval:<br>year 1-5  |             | The second interval:<br>year 6-10 |             | The last interval:<br>year 11-15 |             |
|                               |                                                                        |     |   | Lower bound                      | Upper bound | Lower bound                       | Upper bound | Lower bound                      | Upper bound |
|                               |                                                                        |     |   | Lower bound                      | Upper bound | Lower bound                       | Upper bound | Lower bound                      | Upper bound |
| Scenarios without gene drives | ITNs                                                                   | 50% | A | dominated                        | dominated   | negative                          | dominated   | negative                         | dominated   |
|                               |                                                                        | 80% | B | dominated                        | dominated   | negative                          | dominated   | negative                         | dominated   |
|                               |                                                                        | 95% | C | 6.52                             | 6.52        | negative                          | dominated   | negative                         | dominated   |
|                               | ACT                                                                    | 50% | D | negative                         | negative    | negative                          | negative    | negative                         | negative    |
|                               |                                                                        | 80% | E | negative                         | negative    | negative                          | negative    | negative                         | negative    |
|                               |                                                                        | 95% | F | First point                      | First point | negative                          | First point | negative                         | First point |
|                               | ITNs & ACT                                                             | 50% | G | dominated                        | dominated   | negative                          | dominated   | negative                         | dominated   |
|                               |                                                                        | 80% | H | 0.43                             | 0.43        | dominated                         | 2.82        | dominated                        | dominated   |
|                               |                                                                        | 95% | I | 0.23                             | 0.23        | dominated                         | 0.25        | dominated                        | 0.30        |
| Scenarios with gene drives    | 300 gene drive mosquitoes with X-shredding rates = 1.0 alone           | NA  | J | dominated                        | dominated   | First point                       | 2.62        | First point                      | 2.76        |
|                               | ITNs plus gene drives with X-shredding rates = 0.95 and 1.0            | 80  | K | dominated                        | dominated   | dominated                         | 2.90        | dominated                        | 3.42        |
|                               | ITNs plus gene drives with X-shredding rates = 0.95 and 1.0            | 95  | L | 1.67                             | 10.56       | dominated                         | 3.23        | dominated                        | 3.07        |
|                               | ACT plus gene drives with X-shredding rates = 0.95 and 1.0             | 95  | M | 1.22                             | 12.10       | 9.74                              | 2.68        | dominated                        | 3.12        |
|                               | ITNs & ACT plus gene drives with X-shredding rates = 0.95 and 1.0      | 50  | N | 2.12                             | 13.66       | 28.36                             | 2.85        | dominated                        | 3.33        |
|                               | ITNs & ACT plus gene drives with X-shredding rates = 0.95 and 1.0      | 80  | O | 0.69                             | 4.06        | dominated                         | 2.93        | 20.99                            | 3.03        |
|                               | ITNs & ACT plus gene drives with X-shredding rates = 0.9, 0.95 and 1.0 | 95  | P | 0.51                             | 3.14        | dominated                         | 2.92        | 17.93                            | 2.99        |

70 **Keys for Table S3:**

- 71 • ICER: Incremental cost-effectiveness ratio
- 72 • Negative: the incremental cost and the incremental effect are negative
- 73 • Dominated: the incremental cost is positive, and the incremental effect is negative
- 74 • Vector control strategies that could reach malaria elimination were highlighted in green.
- 75 • **Incremental cost-effectiveness ratio (ICER)** is defined as the incremental change in cost, divided by the incremental change in its effectiveness. The first,
- 76 second, and third points of each expansion path were highlighted in red, orange, and yellow accordingly.

77 **Supplementary 7: Costs of vector control approaches that involve the release of**  
78 **mosquitoes to modify vector population – A systematic scoping review.**

79 Background

80 Vector control approaches that involve the release of mosquitoes to modify the vector  
81 population range from *Wolbachia* related technique to sterile insect production using radiation  
82 technique (1,2). For *Wolbachia* related technique, the strategy proposed to infect mosquitoes  
83 with *Wolbachia* endosymbiotic that inhibits the viral replication and dissemination and  
84 eventually completely blocks vector-borne disease transmissions (3). The latter strategy, sterile  
85 insect technique (SIT) exposes male mosquitoes with low radiation in the laboratory production.  
86 This leads to sterilization of the male mosquitoes but maintain their copulation capacity (4).  
87 Once released to the environment, the sterile male mosquitoes mate wild female mosquitoes  
88 which would produce sterile eggs thereby eliminating the next generation progenies (5).  
89 Producing SIT insects at a large scale requires standardized mass-rearing procedures to produce  
90 good quality males that could compete with wild males to mate with females in the wild  
91 environment (6). Later development of these strategies includes the release of genetically  
92 engineered mosquitoes carrying dominant lethal allele that are capable of killing a subsequent  
93 generation (7). The produced OX513A mosquitoes are males that once mate with wild female  
94 mosquitoes will produce descendants that would not reach the adult stage due to lethal genes  
95 (8).

96 It is necessary for the decision to adapt these strategies specifically modifying mosquito  
97 vectors to be based on evidence of program effectiveness and cost-effectiveness of the  
98 interventions (9,10). However, evidence on costs and cost assessments of these strategies  
99 remain disparate. Data on costs could provide invaluable information for implementing vector  
100 control programs as malaria and other mosquito-borne infectious diseases continue to be a  
101 public health problem despite past and on-going control efforts (10). For sustenance of control  
102 efforts to achieve the disease elimination goal, it is important that the most cost-effective  
103 interventions are deployed (11). This supplementary is a systematic scoping review on costs and  
104 cost analysis of vector control approaches that involve the release of mosquitoes to modify the  
105 vector population focusing relevance on mosquito-borne diseases, especially malaria.

106 Methods

107 A systematic search of literatures in English language pertaining to costs of vector  
108 control methods to modify mosquito populations, published from 2010 to 2020, was performed  
109 (Diagram S1). Databases include National Center for Biotechnology Information (NCBI),  
110 Google Scholar, Crossref, and Scopus. Search terms include ‘Culicidae’ and ‘genetic  
111 engineering’ or ‘genetically modified’ and ‘costs’ or ‘cost analysis’ and ‘malaria’.

112 3,486 records of the initial search: 761 articles in PubMed Central, 13 articles in  
113 PubMed, 22 items in 13 books, 2480 articles in Google Scholar, 200 articles in Crossref, and 10  
114 articles in Scopus, were screened for relevance, and those that included some forms of  
115 information on costs of new vector control intended to modify mosquito populations were  
116 assessed further in full texts for eligibility. 8 articles from reference lists thought to be relevant  
117 based on their titles alone were included in the full-text assessment. We excluded 3,428 articles  
118 that were duplicated, or full texts not provided. In full-text assessment, 66 articles were included  
119 based on selection criteria suggested costs or cost analysis of vector control methods intended to  
120 modify mosquito populations were described in monetary terms. 58 publications did not  
121 mention costs or mentioned but did not provide estimates in terms of monetary numbers were  
122 excluded. Details of literature selection procedures are in Diagram S1.



**Supplementary: Modeling impact and cost-effectiveness of gene drives for malaria elimination in the Democratic Republic of the Congo**

123 After eligible articles passed to the full-text assessment, we extracted details on  
124 publication year, country/region, target development, target disease, costs, the category of costs.  
125 Monetary cost data were first adjusted to US\$ in the year of the initial study using historical  
126 exchange rates provided in the article if the adjustment was not supplied by the authors. If the  
127 currency year was not mentioned in the article, the publication date or date of article submission  
128 was used for the currency conversion. All monetary data were standardized to 2000 US\$ using  
129 the US government consumer price index (CPI) data to adjust for inflation (12). All costs were  
130 adjusted to US\$ value in year 2000 to allow comparison of the costs of interventions across data  
131 sources.

132 Diagram S1 Search strategy for costing studies

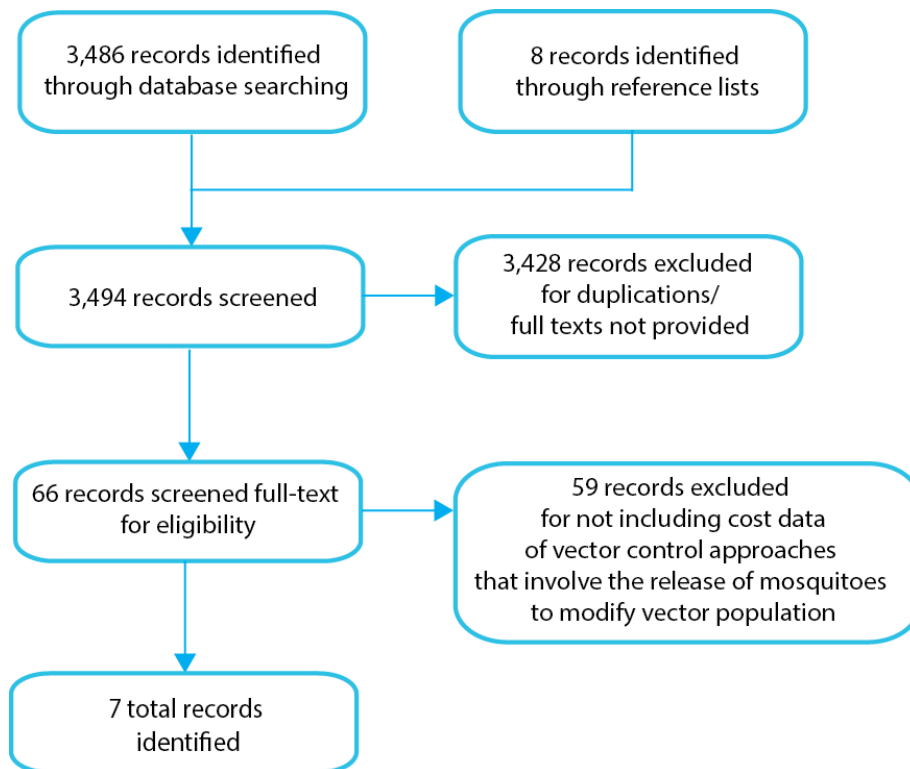

133  
134  
135

Results

136 Four out of seven eligible records focused on or used data from research conducted in  
137 low- and middle-income countries and were published between 2011 and 2018. Most studies  
138 focused on Dengue using various techniques including *Wolbachia* infected mosquitoes, sterile  
139 insect technique (SIT), Release of Insects carrying Dominant Lethals (RIDL), and Genetically  
140 engineered (GE) mosquitoes i.e., Oxitec. Only one study specifically identified cost of in  
141 malaria control. One study (13) developed a cost model to calculate costs of genetic RIDL  
142 technology for dengue and was referenced by another study (14). In terms of costs, costs of the  
143 release of SIT insects range from 29.42 to 800 US\$ (14) per million insects depending on cost  
144 categories. The costs of GM mosquitoes are varied and higher at the beginning of release with  
145 lower cost during later maintenance phase. *Wolbachia* infected mosquitoes gives low cost at  
146 0.72 US\$ per person. Table S4 summarized the study characteristics and details on costs  
147 described in each study.  
148

Supplementary: Modeling impact and cost-effectiveness of gene drives for malaria elimination in the Democratic Republic of the Congo

149 Table S4 Summary of study characteristics and details on costs of vector control approaches that involve the release of mosquitoes to modify the vector  
 150 population focusing relevance on mosquito-borne diseases.

| References                                                                                        | Publication year | Country                                        | Target development                        | Target disease                                        | Target species              | Cost originally indicated                                                                                                 | Converted cost to year 2000                                                            | Category of costs                                                                                          |
|---------------------------------------------------------------------------------------------------|------------------|------------------------------------------------|-------------------------------------------|-------------------------------------------------------|-----------------------------|---------------------------------------------------------------------------------------------------------------------------|----------------------------------------------------------------------------------------|------------------------------------------------------------------------------------------------------------|
| Khamis D, El Mouden C, Kura K, et al. (14)                                                        | 2018             | Not specified                                  | Sterile insect technique (SIT) mosquitoes | Malaria                                               | Not specified               | mean = 9.11 (min = 1.93, max = 25.36) US\$ per 10,000 insect per day                                                      | 6.25 (1.32, 17.39) US\$ per 10,000 insects per days                                    | Operational costs                                                                                          |
| O'Neill SL, Ryan PA, Turley AP, Wilson G, Retzki K, Iturbe-Ormaetxe I et al. (15)                 | 2018             | Australia                                      | <i>Wolbachia</i> infected mosquitoes      | Dengue and other <i>Aedes</i> transmitted arboviruses | <i>Aedes aegypti</i>        | <i>Wolbachia</i> infected mosquito: 1.07 US\$ per person                                                                  | 0.72 US\$ per person*                                                                  | Deployment cost                                                                                            |
| Meghani Z and Boëte C. (16)                                                                       | 2018             | Brazil                                         | Genetically engineered (GE) mosquitoes    | Dengue                                                | <i>Aedes aegypti</i>        | 1.9 million US\$ and 384,000 US\$ for subsequent years per 50,000 urban population                                        | 1.36 million US\$ and 275,511.96 US\$ for subsequent years per 50,000 urban population | Not specified but mentioned that the costs did not consider recurrent relicensing and subsidizing the cost |
|                                                                                                   |                  |                                                |                                           |                                                       |                             | Oxitec: 10 US\$ per person (in year 2016)                                                                                 | Oxitec: 7.17 US\$ per person**                                                         |                                                                                                            |
| Alfaro-Murillo JA, Parpia AS, Fitzpatrick MC, Tamagnan JA, Medlock J, Ndeffo-Mbah ML, et al. (17) | 2016             | Middle-income countries (main country: Brazil) | GE mosquitoes (Oxitec)                    | Zika                                                  | <i>Aedes aegypti</i> (male) | 1.9 million US\$ (in year 2015) in the first year and 384,000 US\$ each year thereafter for an urban population of 50,000 | 1.38 million US\$ (for 1 <sup>st</sup> year) and 278,987.58 US\$ per year afterward    | Not stated                                                                                                 |

Supplementary: Modeling impact and cost-effectiveness of gene drives for malaria elimination in the Democratic Republic of the Congo

| References                                                       | Publication year | Country                                           | Target development                                                                                                     | Target disease               | Target species                  | Cost originally indicated                                                                                                                                   | Converted cost to year 2000                                                                                                                   | Category of costs                  |
|------------------------------------------------------------------|------------------|---------------------------------------------------|------------------------------------------------------------------------------------------------------------------------|------------------------------|---------------------------------|-------------------------------------------------------------------------------------------------------------------------------------------------------------|-----------------------------------------------------------------------------------------------------------------------------------------------|------------------------------------|
| Undurraga EA, Halasa YA, Shepard DS. (18)                        | 2016             | Brazil, Mexico, Panama, Puerto Rico, and Thailand | Genetic modified (GM) mosquitoes                                                                                       | Dengue                       | <i>Aedes</i>                    | 25-75 US\$ per person per year in suppression phase and 10-20 US\$ per person per year in maintenance phase, based on preliminary estimates by Oxitec.      | 17.94-53.81 US\$ per person per year in suppression phase and 7.17**-14.35 US\$ per person per year in maintenance phase                      | Overall cost estimate              |
| Bellini R, Medici A, Puggioli A, Balestrino F, Carrieri AM. (19) | 2013             | India                                             | SIT                                                                                                                    | Arboviral diseases in humans | <i>Aedes albopictus</i> (Skuse) | 40 US\$ per million male mosquitoes per day                                                                                                                 | 29.42 US\$ per million male mosquitoes per day                                                                                                | Production cost                    |
| Alphey N, Alphey L, and Bonsall MB. (13)                         | 2011             | Not specified                                     | Genetic Release of Insects carrying Dominant Lethals (RIDL) technology (Release of Insects carrying a Dominant Lethal) | Dengue                       | <i>Aedes aegypti</i>            | 1 US\$ per 1000 insects (in year 2008)                                                                                                                      | 0.80 US\$ per 1,000 insects                                                                                                                   | Construction and operational costs |
|                                                                  |                  |                                                   |                                                                                                                        |                              |                                 | 2.30 US\$ per case averted (in year 2008)                                                                                                                   | 1.84 US\$ per case averted                                                                                                                    |                                    |
|                                                                  |                  |                                                   |                                                                                                                        |                              |                                 | Mean cost per person protected per year during the assessment period is 0.05–0.07 US\$ or 0.52–0.68 US\$ (release ratio 1 or 10, respectively in year 2008) | Mean cost per person protected per year during the assessment period is 0.04-0.07 US\$ or 0.42-0.54 US\$ (release ratio 1 or 10 respectively) |                                    |

151 \*lower bound cost applied in the main study.

152 \*\*upper bound cost applied in the main study.

153 **Discussion**

154 During the past 10 years, only handful costing evidence of vector control approaches  
155 that involve the release of mosquitoes to modify the vector population focusing relevance on  
156 mosquito-borne diseases, especially malaria, has been made available. When costs were  
157 mentioned, the studies were often not undertaken alongside an evaluation of the clinical and  
158 epidemiological effect of the methods of interest. This systematic scoping review is an early  
159 attempt to combine evidence on costs of the approaches.

160 **References**

- 161 1. Committee on Gene Drive Research in Non-Human Organisms: Recommendations for Responsible  
162 Conduct; Board on Life Sciences; Division on Earth and Life Studies; National Academies of Sciences  
163 Engineering and Medicine. Gene Drives on the Horizon: Advancing Science, Navigating Uncertainty, and  
164 Aligning Research with Public Values [Internet]. National Academies Press; 2016. Available from:  
165 <http://www.nap.edu/catalog/23405>
- 166 2. Flores HA, O'Neill SL. Controlling vector-borne diseases by releasing modified mosquitoes [Internet]. Vol.  
167 16, Nature Reviews Microbiology. Nature Publishing Group; 2018 [cited 2021 Jan 24]. p. 508–18. Available  
168 from: <https://www.nature.com/articles/s41579-018-0025-0>
- 169 3. Gomes FM, Barillas-Mury C. Infection of *Anopheles* mosquitoes with Wolbachia: Implications for malaria  
170 control [Internet]. Vol. 14, PLoS Pathogens. Public Library of Science; 2018 [cited 2021 Jan 24]. Available  
171 from: <https://www.ncbi.nlm.nih.gov/pmc/articles/PMC6237385/>
- 172 4. Reis NN, Silva AL da, Reis EPG, Silva FC e., Reis IGN. Viruses vector control proposal: genus *Aedes*  
173 emphasis. Vol. 21, Brazilian Journal of Infectious Diseases. Elsevier Editora Ltda; 2017. p. 457–63.
- 174 5. Reis NN, Silva AL da, Reis EPG, Silva FC e., Reis IGN. Viruses vector control proposal: genus *Aedes*  
175 emphasis. Brazilian Journal of Infectious Diseases [Internet]. 2017;21(4):457–63. Available from:  
176 <http://dx.doi.org/10.1016/j.bjid.2017.03.020>
- 177 6. Mamai W, Lobb LN, Bimbilé Somda NS, Maiga H, Yamada H, Lees RS, et al. Optimization of mass-rearing  
178 methods for *Anopheles arabiensis* larval stages: Effects of rearing water temperature and larval density on  
179 mosquito life-history traits. Journal of Economic Entomology. 2018;111(5):2383–90.
- 180 7. Hoang PN, Daniel Zucker J, Choisy M, Vinh HT. Causality analysis between climatic factors and dengue  
181 fever using the Granger causality. 2016 IEEE RIVF International Conference on Computing and  
182 Communication Technologies: Research, Innovation, and Vision for the Future, RIVF 2016 - Proceedings.  
183 2016;49–54.
- 184 8. Wentzel M. Brasil testa duas 'armas' contra o *Aedes aegypti*; saiba quando teremos resultado O mosquito  
185 inoculado. BBC News Brasil. 2015;1–9.
- 186 9. WHO. Guidelines for malaria vector control [Internet]. 2019 [cited 2021 Jan 24]. Available from:  
187 <https://apps.who.int/iris/bitstream/handle/10665/310862/9789241550499-eng.pdf?ua=1>
- 188 10. WHO. Global Vector Control Response 2017-2030 [Internet]. 2017 [cited 2021 Jan 24]. Available from:  
189 [https://apps.who.int/iris/bitstream/handle/10665/259205/9789241512978-](https://apps.who.int/iris/bitstream/handle/10665/259205/9789241512978-eng.pdf;jsessionid=BCA2E1473557FBC791074D7675EA2BE3?sequence=1)  
190 [eng.pdf;jsessionid=BCA2E1473557FBC791074D7675EA2BE3?sequence=1](https://apps.who.int/iris/bitstream/handle/10665/259205/9789241512978-eng.pdf;jsessionid=BCA2E1473557FBC791074D7675EA2BE3?sequence=1)
- 191 11. White MT, Conteh L, Cibulskis R, Ghani AC. Costs and cost-effectiveness of malaria control interventions--  
192 a systematic review. Malaria journal. 2011 Nov;10:337.
- 193 12. U.S. Bureau of Labor Statistics. 2000 Home : The Economics Daily : U.S. Bureau of Labor Statistics  
194 [Internet]. 2000 [cited 2021 Jan 24]. Available from: <https://www.bls.gov/opub/td/2000/home.htm>
- 195 13. Alphey N, Alphey L, Bonsall MB. A model framework to estimate impact and cost of genetics-based sterile  
196 insect methods for dengue vector control. PLoS ONE. 2011;6(10).
- 197 14. Khamis D, El Mouden C, Kura K, Bonsall MB. Optimal control of malaria: Combining vector interventions  
198 and drug therapies. Malaria Journal [Internet]. 2018;17(1):1–18. Available from:  
199 <https://doi.org/10.1186/s12936-018-2321-6>
- 200 15. O'Neill SL, Ryan PA, Turley AP, Wilson G, Retzki K, Iturbe-Ormaetxe I, et al. Scaled deployment of  
201 Wolbachia to protect the community from dengue and other aedes transmitted arboviruses. Gates Open  
202 Research. 2018 Aug 13;2:36.
- 203 16. Meghani Z, Boëte C. Genetically engineered mosquitoes, Zika and other arboviruses, community  
204 engagement, costs, and patents: Ethical issues. PLoS Neglected Tropical Diseases. 2018;12(7):1–7.
- 205 17. Alfaro-Murillo JA, Parpia AS, Fitzpatrick MC, Tamagnan JA, Medlock J, Ndeffo-Mbah ML, et al. A Cost-  
206 Effectiveness Tool for Informing Policies on Zika Virus Control. PLoS Neglected Tropical Diseases  
207 [Internet]. 2016;10(5):1–14. Available from: <http://dx.doi.org/10.1371/journal.pntd.0004743>
- 208 18. Undurraga EA, Halasa YA, Shepard DS. Economic Analysis of Genetically Modified Mosquito Strategies.  
209 In: Genetic Control of Malaria and Dengue. Elsevier Inc.; 2016. p. 375–408.
- 210 19. Bellini R, Medici A, Puggioli A, Balestrino F, Carrieri AM. Pilot Field Trials With *Aedes albopictus*  
211 Irradiated Sterile Males in Italian Urban Areas. J Med Entomol [Internet]. 2013 [cited 2021 Jan  
212 24];50(2):317–25. Available from: <http://dx.doi.org/10.1603/ME12048>
